# Supplementary material for: Clinical and health inequality risk factors for non-COVID-related sepsis during the global COVID-19 pandemic: a national case-control and cohort study
Source: PubMed Central journal article supplement (PMC10772239; doi:10.1016/j.eclinm.2023.102321), 2023-11-23
Supplement: mmc1.pdf [file mmc1.pdf]

## Supplementary materials

Table count: 19

Text count: 6

Figure count: 15

|                                                                                                                                                                             |    |
|-----------------------------------------------------------------------------------------------------------------------------------------------------------------------------|----|
| eTable 1. Code lists used for variable definition.....                                                                                                                      | 3  |
| eTable 2. Baseline characteristic for cases with non-COVID-19 sepsis and controls (continued from Table 1 in the main text).....                                            | 4  |
| eTable 3. Baseline demographics and comorbidities for cases in community-acquired/hospital-acquired sepsis.....                                                             | 5  |
| eTable 4. The total number of cases with new non-COVID-19 sepsis for each specified period.....                                                                             | 6  |
| eTable 5. Discrimination in fully adjusted (all comorbidities*) condition logistic models for differentiating cases with non-COVID-19 and controls.....                     | 6  |
| eTable 6. Percentage of cases with community-acquired non-COVID-19 sepsis dying within 30 days in different COVID-19 period.....                                            | 7  |
| eTable 7. Percentage of cases with hospital-acquired non-COVID-19 sepsis dying within 30 days in different COVID-19 period.....                                             | 8  |
| eTable 8. Adjusted ORs of community-acquired sepsis 30-day mortality stratified by COVID-19 period.....                                                                     | 9  |
| eTable 9. ORs of developing non-COVID-19 sepsis for factors stratified by sepsis type (Complete case analysis).....                                                         | 11 |
| eTable 10. Adjusted ORs of developing non-COVID-19 sepsis for clinical characteristics stratified by sepsis type (Complete case analysis).....                              | 12 |
| eTable 11. Association between index of multiple deprivations (IMD) quintile and risk of hospital admission for Sepsis (Complete case analysis).....                        | 13 |
| eTable 12. Adjusted ORs of community-acquired sepsis 30-day mortality stratified by COVID-19 period (Complete risk analysis).....                                           | 14 |
| eTable 13. Adjusted ORs of community-acquired sepsis 30-day mortality (COVID-19 period as a moderator).....                                                                 | 16 |
| eTable 14. The underlying number of Figure 2.....                                                                                                                           | 18 |
| eTable 15. ORs of developing non-COVID-19 sepsis for factors stratified by sepsis type (Multiple imputation).....                                                           | 23 |
| eTable 16. ORs of developing non-COVID-19 sepsis for factors stratified by sepsis type (Multiple imputation, 18+ years old study population).....                           | 24 |
| eTable 17. Adjusted ORs of developing non-COVID-19 sepsis for clinical characteristics stratified by sepsis type (Multiple imputation).....                                 | 25 |
| eTable 18. Adjusted ORs of developing non-COVID-19 sepsis for clinical characteristics stratified by sepsis type (Multiple imputation, 18+ years old study population)..... | 26 |
| eTable 19. Adjusted ORs of community-acquired sepsis 30-day mortality stratified by COVID-19 period (Multiple imputation).....                                              | 27 |
| eText 1. The selection criteria for potential controls.....                                                                                                                 | 29 |
| eText 2. The definition of Index of Multiple Deprivation (IMD) quintile.....                                                                                                | 29 |
| eText 3. The definition of predictors.....                                                                                                                                  | 29 |
| eText 4. Missing data.....                                                                                                                                                  | 29 |
| eText 5. Model adjustments for IMD.....                                                                                                                                     | 30 |
| eText 6. Comparing the different approaches to dealing with missing data.....                                                                                               | 30 |
| eFigure 1. Diagram of patient selection (index date) and prior antibiotic measurements.....                                                                                 | 31 |
| eFigure 2. Age-specific incidence rate of community-acquired sepsis.....                                                                                                    | 32 |
| eFigure 3. Age-specific incidence rate of hospital-acquired sepsis.....                                                                                                     | 33 |
| eFigure 4. Association between index of multiple deprivations (IMD) quintile and risk of hospital admission for Sepsis.....                                                 | 34 |
| eFigure 5. ORs for the number of antibiotics given within six weeks before the index date.....                                                                              | 35 |
| eFigure 6. Association between index of multiple deprivations (IMD) quintile and risk of hospital admission for Sepsis (18+ years old study population).....                | 36 |
| eFigure 7. Crude ORs of sepsis by region, ethnicity, BMI, smoking history and stratified by type of sepsis (18+ years old study population).....                            | 37 |
| eFigure 8. Crude ORs of developing sepsis for clinical characteristics stratified by sepsis type (18+ years old study population).....                                      | 39 |
| eFigure 9. Adjusted ORs of developing sepsis for clinical characteristics stratified by sepsis type (18+ years old study population).....                                   | 41 |
| eFigure 10. Adjusted ORs of all sepsis mortality stratified by COVID-19 period.....                                                                                         | 43 |
| eFigure 11. Adjusted ORs of hospital-acquired sepsis mortality stratified by COVID-19 period.....                                                                           | 45 |
| eFigure 12. Fully adjusted ORs of all sepsis mortality stratified by COVID-19 period.....                                                                                   | 47 |

|                                                                                                                                                     |    |
|-----------------------------------------------------------------------------------------------------------------------------------------------------|----|
| eFigure 13. Fully adjusted ORs of community-acquired sepsis mortality stratified by COVID-19 period .....                                           | 49 |
| eFigure 14. Fully adjusted ORs of hospital-acquired sepsis mortality stratified by COVID-19 period.....                                             | 51 |
| eFigure 15. Directed acyclic graph (DAG) of the association between IMD (socioeconomic status) and the risk of developing non-COVID-19 sepsis ..... | 52 |
| <br>                                                                                                                                                |    |
| Supplement: the OpenSAFELY collaborative .....                                                                                                      | 54 |

**eTable 1. Code lists used for variable definition**

1. Code lists are available at <https://www.opencodelists.org/>
2. Link: <https://www.opencodelists.org/codelist/add-code-list-version>

| variable                                                    | Codelist version                                                                                                                                                                                                                                                                                                                                                                                                                                                                                                                                                                                              |
|-------------------------------------------------------------|---------------------------------------------------------------------------------------------------------------------------------------------------------------------------------------------------------------------------------------------------------------------------------------------------------------------------------------------------------------------------------------------------------------------------------------------------------------------------------------------------------------------------------------------------------------------------------------------------------------|
| Ethnicity                                                   | <a href="https://codelists.opensafely.org/codelist/opensafely/ethnicity/2020-04-27/">https://codelists.opensafely.org/codelist/opensafely/ethnicity/2020-04-27/</a>                                                                                                                                                                                                                                                                                                                                                                                                                                           |
| Sepsis (hospital)                                           | <a href="https://codelists.opensafely.org/codelist/user/BillyZhongUOM/codes_for_sepsis/00ab8f66/">https://codelists.opensafely.org/codelist/user/BillyZhongUOM/codes_for_sepsis/00ab8f66/</a>                                                                                                                                                                                                                                                                                                                                                                                                                 |
| Sepsis (primary care)                                       | <a href="https://codelists.opensafely.org/codelist/user/rriefu/sepsis/7224264f/">https://codelists.opensafely.org/codelist/user/rriefu/sepsis/7224264f/</a>                                                                                                                                                                                                                                                                                                                                                                                                                                                   |
| <b>Covid diagnosis</b>                                      |                                                                                                                                                                                                                                                                                                                                                                                                                                                                                                                                                                                                               |
| Covid (Primary care)                                        | <a href="https://codelists.opensafely.org/codelist/opensafely/covid-identification-in-primary-care-probable-covid-clinical-code/24391856">https://codelists.opensafely.org/codelist/opensafely/covid-identification-in-primary-care-probable-covid-clinical-code/24391856</a>                                                                                                                                                                                                                                                                                                                                 |
| Covid positive test (Primary care)                          | <a href="https://codelists.opensafely.org/codelist/opensafely/covid-identification-in-primary-care-probable-covid-positive-test/3d488b8b/">https://codelists.opensafely.org/codelist/opensafely/covid-identification-in-primary-care-probable-covid-positive-test/3d488b8b/</a>                                                                                                                                                                                                                                                                                                                               |
| Covid (primary care sequelae)                               | <a href="https://codelists.opensafely.org/codelist/opensafely/covid-identification-in-primary-care-probable-covid-sequelae/0b29a521/">https://codelists.opensafely.org/codelist/opensafely/covid-identification-in-primary-care-probable-covid-sequelae/0b29a521/</a>                                                                                                                                                                                                                                                                                                                                         |
| covid_codelist                                              | <code>codelist(["U071", "U072"], system="icd10")</code>                                                                                                                                                                                                                                                                                                                                                                                                                                                                                                                                                       |
| confirmed_covid_codelist                                    | <code>codelist(["U071"], system="icd10")</code>                                                                                                                                                                                                                                                                                                                                                                                                                                                                                                                                                               |
| suspected_covid_codelist                                    | <code>codelist(["U072"], system="icd10")</code>                                                                                                                                                                                                                                                                                                                                                                                                                                                                                                                                                               |
| Smoking                                                     | <a href="https://codelists.opensafely.org/codelist/opensafely/smoking-clear/2020-04-29/">"https://codelists.opensafely.org/codelist/opensafely/smoking-clear/2020-04-29/"</a>                                                                                                                                                                                                                                                                                                                                                                                                                                 |
| Hazardous alcohol use                                       | <a href="https://codelists.opensafely.org/codelist/opensafely/hazardous-alcohol-drinking/6364474b/">"https://codelists.opensafely.org/codelist/opensafely/hazardous-alcohol-drinking/6364474b/"</a>                                                                                                                                                                                                                                                                                                                                                                                                           |
| <b>Comorbidities</b>                                        |                                                                                                                                                                                                                                                                                                                                                                                                                                                                                                                                                                                                               |
| Hypertension diagnosis                                      | <a href="https://codelists.opensafely.org/codelist/opensafely/hypertension/2020-04-28/">https://codelists.opensafely.org/codelist/opensafely/hypertension/2020-04-28/</a>                                                                                                                                                                                                                                                                                                                                                                                                                                     |
| Chronic respiratory disease diagnosis                       | <a href="https://codelists.opensafely.org/codelist/opensafely/chronic-respiratory-disease/2020-04-10/">https://codelists.opensafely.org/codelist/opensafely/chronic-respiratory-disease/2020-04-10/</a>                                                                                                                                                                                                                                                                                                                                                                                                       |
| Asthma diagnosis                                            | <a href="https://codelists.opensafely.org/codelist/opensafely/asthma-diagnosis/2020-04-15/">"https://codelists.opensafely.org/codelist/opensafely/asthma-diagnosis/2020-04-15/"</a><br><a href="https://codelists.opensafely.org/codelist/opensafely/asthma-oral-prednisolone-medication/2020-04-27/">https://codelists.opensafely.org/codelist/opensafely/asthma-oral-prednisolone-medication/2020-04-27/</a>                                                                                                                                                                                                |
| Blood pressure                                              | <code>Systolic ["2469."], system="ctv3",</code><br><code>Diastolic ["246A."],system="ctv3")</code>                                                                                                                                                                                                                                                                                                                                                                                                                                                                                                            |
| Chronic cardiac disease diagnosis                           | <a href="https://codelists.opensafely.org/codelist/opensafely/chronic-cardiac-disease/2020-04-08/">https://codelists.opensafely.org/codelist/opensafely/chronic-cardiac-disease/2020-04-08/</a>                                                                                                                                                                                                                                                                                                                                                                                                               |
| Diabetes diagnosis                                          | <a href="https://codelists.opensafely.org/codelist/opensafely/diabetes/2020-04-15/">https://codelists.opensafely.org/codelist/opensafely/diabetes/2020-04-15/</a>                                                                                                                                                                                                                                                                                                                                                                                                                                             |
| Measures of hba1c                                           | <a href="https://codelists.opensafely.org/codelist/opensafely/glycated-haemoglobin-hba1c-tests-ifcc/6d7287f8/">https://codelists.opensafely.org/codelist/opensafely/glycated-haemoglobin-hba1c-tests-ifcc/6d7287f8/</a>                                                                                                                                                                                                                                                                                                                                                                                       |
| Cancer diagnosis                                            | <a href="https://codelists.opensafely.org/codelist/opensafely/haematological-cancer/2020-04-15/">https://codelists.opensafely.org/codelist/opensafely/haematological-cancer/2020-04-15/</a><br><a href="https://codelists.opensafely.org/codelist/opensafely/lung-cancer/2020-04-15/">https://codelists.opensafely.org/codelist/opensafely/lung-cancer/2020-04-15/</a><br><a href="https://codelists.opensafely.org/codelist/opensafely/cancer-excluding-lung-and-haematological/2020-04-15/">"https://codelists.opensafely.org/codelist/opensafely/cancer-excluding-lung-and-haematological/2020-04-15/"</a> |
| Dialysis                                                    | <a href="https://codelists.opensafely.org/codelist/opensafely/dialysis/3ce108ac/">https://codelists.opensafely.org/codelist/opensafely/dialysis/3ce108ac/</a>                                                                                                                                                                                                                                                                                                                                                                                                                                                 |
| Kidney transplant                                           | <a href="https://codelists.opensafely.org/codelist/opensafely/kidney-transplant/2020-07-15/">https://codelists.opensafely.org/codelist/opensafely/kidney-transplant/2020-07-15/</a>                                                                                                                                                                                                                                                                                                                                                                                                                           |
| Creatinine codes                                            | <code>codelist(["XE2q5"], system="ctv3")</code>                                                                                                                                                                                                                                                                                                                                                                                                                                                                                                                                                               |
| Chronic liver disease diagnosis                             | <a href="https://codelists.opensafely.org/codelist/opensafely/chronic-liver-disease/2020-06-02/">https://codelists.opensafely.org/codelist/opensafely/chronic-liver-disease/2020-06-02/</a>                                                                                                                                                                                                                                                                                                                                                                                                                   |
| Stroke                                                      | <a href="https://codelists.opensafely.org/codelist/opensafely/stroke-updated/2020-06-02/">https://codelists.opensafely.org/codelist/opensafely/stroke-updated/2020-06-02/</a>                                                                                                                                                                                                                                                                                                                                                                                                                                 |
| Dementia diagnosis                                          | <a href="https://codelists.opensafely.org/codelist/opensafely/dementia/2020-04-22/">https://codelists.opensafely.org/codelist/opensafely/dementia/2020-04-22/</a>                                                                                                                                                                                                                                                                                                                                                                                                                                             |
| Other neurological conditions                               | <a href="https://codelists.opensafely.org/codelist/opensafely/other-neurological-conditions/2020-06-02/">https://codelists.opensafely.org/codelist/opensafely/other-neurological-conditions/2020-06-02/"</a>                                                                                                                                                                                                                                                                                                                                                                                                  |
| Presence of organ transplant (excluding kidney transplants) | <a href="https://codelists.opensafely.org/codelist/opensafely/other-organ-transplant/79caeeec/">https://codelists.opensafely.org/codelist/opensafely/other-organ-transplant/79caeeec/</a>                                                                                                                                                                                                                                                                                                                                                                                                                     |
| Asplenia or dysplenia (acquired or congenital) diagnosis    | <a href="https://codelists.opensafely.org/codelist/opensafely/asplenia/2020-06-02/">https://codelists.opensafely.org/codelist/opensafely/asplenia/2020-06-02/</a>                                                                                                                                                                                                                                                                                                                                                                                                                                             |
| Sickle cell disease diagnosis                               | <a href="https://codelists.opensafely.org/codelist/opensafely/sickle-cell-disease/2020-04-14/">https://codelists.opensafely.org/codelist/opensafely/sickle-cell-disease/2020-04-14/</a>                                                                                                                                                                                                                                                                                                                                                                                                                       |
| Rheumatoid/Lupus/Psoriasis diagnosis                        | <a href="https://codelists.opensafely.org/codelist/opensafely/ra-sle-psoriasis/2020-04-14/">https://codelists.opensafely.org/codelist/opensafely/ra-sle-psoriasis/2020-04-14/</a>                                                                                                                                                                                                                                                                                                                                                                                                                             |
| Immunosuppressive condition                                 | <a href="https://codelists.opensafely.org/codelist/primis-covid19-vacc-uptake/immidx_cov/v1/">https://codelists.opensafely.org/codelist/primis-covid19-vacc-uptake/immidx_cov/v1/</a><br><a href="https://codelists.opensafely.org/codelist/primis-covid19-vacc-uptake/immrx/v1/">https://codelists.opensafely.org/codelist/primis-covid19-vacc-uptake/immrx/v1/</a>                                                                                                                                                                                                                                          |
| Learning disabilities                                       | <a href="https://codelists.opensafely.org/codelist/nhsd-primary-care-domain-refsets/ld_cod/20210127/">https://codelists.opensafely.org/codelist/nhsd-primary-care-domain-refsets/ld_cod/20210127/</a>                                                                                                                                                                                                                                                                                                                                                                                                         |
| Severe mental illness                                       | <a href="https://codelists.opensafely.org/codelist/primis-covid19-vacc-uptake/sev_mental/v1/">https://codelists.opensafely.org/codelist/primis-covid19-vacc-uptake/sev_mental/v1/</a>                                                                                                                                                                                                                                                                                                                                                                                                                         |
| Antibacterial                                               | <a href="https://codelists.opensafely.org/codelist/user/BillyZhongUOM/brit_new_dmd/792101bd">https://codelists.opensafely.org/codelist/user/BillyZhongUOM/brit_new_dmd/792101bd</a>                                                                                                                                                                                                                                                                                                                                                                                                                           |

**eTable 2. Baseline characteristic for cases with non-COVID-19 sepsis and controls (continued from Table 1 in the main text)**

| Variables <sup>a,b</sup>                            |                              | Case                 |      | Control                 |      |
|-----------------------------------------------------|------------------------------|----------------------|------|-------------------------|------|
|                                                     |                              | Number of cases n(%) |      | Number of controls n(%) |      |
| Alcohol problems                                    | No                           | 198540               | 88.5 | 1245100                 | 92.5 |
|                                                     | Yes                          | 25820                | 11.5 | 101065                  | 7.5  |
| Carehome status                                     | No                           | 210170               | 94.0 | 1314195                 | 97.8 |
|                                                     | Yes                          | 13505                | 6.0  | 30020                   | 2.2  |
| Learning disability                                 | No                           | 221225               | 98.6 | 1342300                 | 99.7 |
|                                                     | Yes                          | 3135                 | 1.4  | 3865                    | 0.3  |
| Asthma                                              | No asthma                    | 188610               | 84.1 | 1166400                 | 86.6 |
|                                                     | With no oral steroid use     | 29125                | 13.0 | 156495                  | 11.6 |
|                                                     | With oral steroid use        | 6625                 | 3.0  | 23275                   | 1.7  |
| Diabetes                                            | No diabetes                  | 152555               | 68.0 | 1077195                 | 80.0 |
|                                                     | Controlled                   | 60035                | 26.8 | 230035                  | 17.1 |
|                                                     | Not controlled               | 3820                 | 1.7  | 8725                    | 0.6  |
|                                                     | Without recent Hb1ac measure | 7950                 | 3.5  | 30215                   | 2.2  |
| Organ transplant                                    | No transplant                | 221865               | 98.9 | 1344825                 | 99.9 |
|                                                     | Kidney transplant            | 1950                 | 0.9  | 950                     | 0.1  |
|                                                     | Other organ transplant       | 545                  | 0.2  | 390                     | 0.0  |
| Chronic kidney disease or renal replacement therapy | No CKD or RRT                | 152590               | 68.0 | 1062410                 | 78.9 |
|                                                     | CKD stage 3a                 | 32315                | 14.4 | 172860                  | 12.8 |
|                                                     | CKD stage 3b                 | 22825                | 10.2 | 84390                   | 6.3  |
|                                                     | CKD stage 4                  | 10185                | 4.5  | 21980                   | 1.6  |
|                                                     | CKD stage 5                  | 2140                 | 1.0  | 1920                    | 0.1  |
|                                                     | RRT (dialysis)               | 2800                 | 1.2  | 1805                    | 0.1  |
|                                                     | RRT (transplant)             | 1505                 | 0.7  | 800                     | 0.1  |
| High blood pressure or diagnosed hypertension       | No                           | 100255               | 44.7 | 708230                  | 52.6 |
|                                                     | Yes                          | 124110               | 55.3 | 637935                  | 47.4 |
| Chronic respiratory disease                         | No                           | 183900               | 82.0 | 1219635                 | 90.6 |
|                                                     | Yes                          | 40460                | 18.0 | 126530                  | 9.4  |
| Chronic cardiac disease                             | No                           | 157070               | 70.0 | 1088355                 | 80.8 |
|                                                     | Yes                          | 67290                | 30.0 | 257815                  | 19.2 |
| Cancer (non haematological)                         | No                           | 168480               | 75.1 | 1179105                 | 87.6 |
|                                                     | Yes                          | 55880                | 24.9 | 167060                  | 12.4 |
| Haematological malignancy                           | No                           | 210235               | 93.7 | 1329150                 | 98.7 |
|                                                     | Yes                          | 14125                | 6.3  | 17020                   | 1.3  |
| Chronic liver disease                               | No                           | 217025               | 96.7 | 1336550                 | 99.3 |
|                                                     | Yes                          | 7335                 | 3.3  | 9620                    | 0.7  |
| Stroke                                              | No                           | 197065               | 87.8 | 1256620                 | 93.3 |
|                                                     | Yes                          | 27295                | 12.2 | 89545                   | 6.7  |
| Dementia                                            | No                           | 218735               | 97.5 | 1331000                 | 98.9 |
|                                                     | Yes                          | 5625                 | 2.5  | 15165                   | 1.1  |
| Other neurological disease                          | No                           | 213100               | 95.0 | 1322375                 | 98.2 |
|                                                     | Yes                          | 11260                | 5.0  | 23795                   | 1.8  |
| Asplenia                                            | No                           | 222865               | 99.3 | 1343155                 | 99.8 |
|                                                     | Yes                          | 1495                 | 0.7  | 3010                    | 0.2  |
| Rheumatoid arthritis/lupus/psoriasis                | No                           | 203735               | 90.8 | 1258265                 | 93.5 |
|                                                     | Yes                          | 20625                | 9.2  | 87900                   | 6.5  |
| Immunosuppressive condition                         | No                           | 203895               | 90.9 | 1315285                 | 97.7 |
|                                                     | Yes                          | 20465                | 9.1  | 30880                   | 2.3  |
| Severe mental illness                               | No                           | 218210               | 97.3 | 1331465                 | 98.9 |
|                                                     | Yes                          | 6150                 | 2.7  | 14700                   | 1.1  |

To reduce the risk of secondary disclosure, all counted numbers in the baseline table were rounded to the nearest five

- The codelist of the variable definition was listed in eTable 1.
- The definition of the variables was described in eText 3

**eTable 3. Baseline demographics and comorbidities for cases in community-acquired/hospital-acquired sepsis**

|                                   |                                | Community-acquired cases |      | Hospital-acquired cases |      |
|-----------------------------------|--------------------------------|--------------------------|------|-------------------------|------|
| <b>Age</b>                        | Mean(SD)                       | 70.9                     | 19.0 | 64.4                    | 19.6 |
|                                   |                                | Number of cases n(%)     |      | Number of cases n(%)    |      |
| <b>Sex</b>                        | Female                         | 87400                    | 48.6 | 21536                   | 48.5 |
| <b>Region</b>                     | North East                     | 8195                     | 4.6  | 2080                    | 4.7  |
|                                   | North West                     | 16795                    | 9.3  | 4285                    | 9.7  |
|                                   | Yorkshire and the Humber       | 24905                    | 13.8 | 6025                    | 13.6 |
|                                   | East Midlands                  | 39660                    | 22.0 | 9445                    | 21.3 |
|                                   | West Midlands                  | 7380                     | 4.1  | 1665                    | 3.7  |
|                                   | East of England                | 41845                    | 23.2 | 10235                   | 23.1 |
|                                   | London                         | 8260                     | 4.6  | 2275                    | 5.1  |
|                                   | South East                     | 12955                    | 7.2  | 2695                    | 6.1  |
|                                   | South West                     | 20005                    | 11.1 | 5660                    | 12.8 |
| <b>IMD<sup>a</sup> quintile</b>   | 5 (least deprived)             | 29665                    | 16.5 | 8070                    | 18.2 |
|                                   | 4                              | 35200                    | 19.6 | 9120                    | 20.6 |
|                                   | 3                              | 39080                    | 21.7 | 9620                    | 21.7 |
|                                   | 2                              | 37230                    | 20.7 | 8805                    | 19.8 |
|                                   | 1 (most deprived)              | 38825                    | 21.6 | 8750                    | 19.7 |
| <b>Ethnicity<sup>b</sup></b>      | White                          | 165475                   | 91.9 | 40425                   | 91.1 |
|                                   | Mixed                          | 1095                     | 0.6  | 335                     | 0.8  |
|                                   | South Asian                    | 7540                     | 4.2  | 2180                    | 4.9  |
|                                   | Black                          | 2355                     | 1.3  | 620                     | 1.4  |
|                                   | Other                          | 1585                     | 0.9  | 515                     | 1.2  |
|                                   | Unknown                        | 1940                     | 1.1  | 295                     | 0.7  |
| <b>BMI<sup>c</sup></b>            | Healthy range (18.5-24.9kg/m2) | 51030                    | 28.4 | 12880                   | 29   |
|                                   | Underweight (<18.5 kg/m2)      | 9415                     | 5.2  | 1820                    | 4.1  |
|                                   | Overweight (25-29.9 kg/m2)     | 45035                    | 25   | 11985                   | 27   |
|                                   | Obese I (30-34.9 kg/m2)        | 26050                    | 14.5 | 6580                    | 14.8 |
|                                   | Obese II (35-39.9 kg/m2)       | 11705                    | 6.5  | 2860                    | 6.4  |
|                                   | Obese III (40+ kg/m2)          | 9665                     | 5.4  | 1740                    | 3.9  |
|                                   | Unknown                        | 27090                    | 15.1 | 6500                    | 14.6 |
| <b>Smoking status<sup>d</sup></b> | Never                          | 59215                    | 32.9 | 15150                   | 34.1 |
|                                   | Former                         | 91650                    | 50.9 | 21905                   | 49.4 |
|                                   | Current                        | 25055                    | 13.9 | 6020                    | 13.6 |
|                                   | unknown                        | 4075                     | 2.3  | 1295                    | 2.9  |

To reduce the risk of secondary disclosure, all counted numbers in the baseline table were rounded to the nearest five

a. IMD (Index of Multiple Deprivation) quintile measured from patient-level address

b. Ethnicity in line with 2001 Census categories

c. BMI, Body Mass Index groups based on the NICE definitions

d. Smoking status identified from the most recent clinical records

**eTable 4. The total number of cases with new non-COVID-19 sepsis for each specified period**

|                    |        | <b>Period 1</b> | <b>Period 2</b> | <b>Period 3</b> |
|--------------------|--------|-----------------|-----------------|-----------------|
| Community-acquired | Male   | 40120           | 19570           | 30500           |
|                    | Female | 42525           | 18555           | 28720           |
| Hospital-acquired  | Male   | 10915           | 4580            | 7335            |
|                    | Female | 10430           | 4215            | 6890            |

To reduce the risk of secondary disclosure, all counted numbers in the baseline table were rounded to the nearest five  
 Period 1: 2019-01-01 to 2020-03-25; Period 2: 2020-03-26 to 2021-03-08; Period 3: 2021-03-09 to 2022-06-30

**eTable 5. Discrimination in fully adjusted (all comorbidities\*) condition logistic models for differentiating cases with non-COVID-19 and controls**

|                               | <b>C-statistic</b> |
|-------------------------------|--------------------|
| All                           | 0.769              |
| Community-acquired            | 0.753              |
| Hospital-acquired             | 0.857              |
| All (18+ only)                | 0.769              |
| Community-acquired (18+ only) | 0.754              |
| Hospital-acquired (18+ only)  | 0.855              |

All comorbidities\* Hypertension, chronic cardiac disease, diabetes, stroke, chronic kidney disease or renal replacement therapy) and asthma, cancer (non-haematological and haematological), chronic liver disease, dementia, other neurological disease (including motor neuron disease, myasthenia gravis, multiple sclerosis, Parkinson's disease, cerebral palsy, quadriplegia or hemiplegia, and progressive cerebellar disease), organ kidney transplant, asplenia (due to splenectomy or spleen dysfunction, including sickle cell disease), rheumatoid arthritis/lupus/psoriasis, other immunosuppressive conditions, learning disability, several mental ill, the number of prior antibiotic prescription from one year and six week to six week before the index time (indicating the infection history)

**eTable 6. Percentage of cases with community-acquired non-COVID-19 sepsis dying within 30 days in different COVID-19 period**

| Variables        |                          | Period 1 | Period 2 | Period 3 |
|------------------|--------------------------|----------|----------|----------|
| Number of deaths | N                        | 16560    | 9365     | 14470    |
| Age              | <18                      | 2.1%     | 2.2%     | 1.8%     |
|                  | 18-39                    | 2.9%     | 3.9%     | 3.3%     |
|                  | 40-49                    | 8.4%     | 12.9%    | 12.7%    |
|                  | 50-59                    | 11.8%    | 17.3%    | 16.8%    |
|                  | 60-69                    | 15.4%    | 20.5%    | 19.6%    |
|                  | 70-79                    | 19.6%    | 24.1%    | 24.2%    |
|                  | 80+                      | 28.8%    | 33.7%    | 33.8%    |
| Sex              | Female                   | 20.3%    | 24.7%    | 24.7%    |
|                  | Male                     | 19.8%    | 24.5%    | 24.2%    |
| Region           | East of England          | 20.6%    | 23.4%    | 24.9%    |
|                  | East Midlands            | 19.6%    | 25.4%    | 24.4%    |
|                  | London                   | 16.0%    | 20.9%    | 19.8%    |
|                  | North East               | 20.0%    | 24.2%    | 24.5%    |
|                  | North West               | 22.2%    | 26.7%    | 25.0%    |
|                  | South East               | 16.8%    | 21.5%    | 21.2%    |
|                  | South West               | 19.9%    | 24.0%    | 24.0%    |
|                  | West Midlands            | 20.4%    | 26.5%    | 24.9%    |
|                  | Yorkshire and The Humber | 21.3%    | 26.6%    | 26.7%    |
| IMD              | 1 (Most deprived)        | 19.7%    | 24.2%    | 24.1%    |
|                  | 2                        | 20.7%    | 24.9%    | 24.0%    |
|                  | 3                        | 20.0%    | 24.6%    | 24.4%    |
|                  | 4                        | 20.1%    | 24.6%    | 24.8%    |
|                  | 5 (Least deprived)       | 19.6%    | 24.5%    | 24.9%    |
| Ethnicity        | Black                    | 11.8%    | 16.7%    | 13.4%    |
|                  | Mixed                    | 8.6%     | 15.9%    | 12.2%    |
|                  | Other                    | 13.7%    | 20.3%    | 18.4%    |
|                  | South Asian              | 12.9%    | 17.7%    | 16.4%    |
|                  | Unknown                  | 32.8%    | 31.8%    | 35.0%    |
|                  | White                    | 20.5%    | 24.9%    | 25.0%    |

To reduce the risk of secondary disclosure, all counted numbers in the baseline table were rounded to the nearest five

Period 1: 2019-01-01 to 2020-03-25; Period 2: 2020-03-26 to 2021-03-08; Period 3: 2021-03-09 to 2022-06-30

IMD (Index of Multiple Deprivation) quintile measured from patient-level address

BMI, Body Mass Index groups based on the NICE definitions

**eTable 7. Percentage of cases with hospital-acquired non-COVID-19 sepsis dying within 30 days in different COVID-19 period**

| <b>Variables</b> |                          | <b>Period 1</b> | <b>Period 2</b> | <b>Period 3</b> |
|------------------|--------------------------|-----------------|-----------------|-----------------|
| Number of deaths | N                        | 3480            | 1685            | 2750            |
| <b>Age</b>       | <18                      | 2.6%            | 2.0%            | 2.6%            |
|                  | 18-39                    | 2.1%            | 2.1%            | 2.3%            |
|                  | 40-49                    | 7.1%            | 9.3%            | 11.8%           |
|                  | 50-59                    | 10.8%           | 12.8%           | 13.2%           |
|                  | 60-69                    | 14.5%           | 18.3%           | 18.2%           |
|                  | 70-79                    | 18.6%           | 23.0%           | 22.7%           |
|                  | 80+                      | 28.9%           | 33.1%           | 32.2%           |
| <b>Sex</b>       | Female                   | 14.4%           | 17.3%           | 18.1%           |
|                  | Male                     | 18.1%           | 20.9%           | 20.5%           |
| <b>Region</b>    | East of England          | 16.2%           | 18.7%           | 20.3%           |
|                  | East Midlands            | 15.5%           | 20.0%           | 17.5%           |
|                  | London                   | 14.7%           | 10.1%           | 16.1%           |
|                  | North East               | 17.4%           | 16.5%           | 20.6%           |
|                  | North West               | 16.3%           | 22.0%           | 21.8%           |
|                  | South East               | 17.1%           | 21.1%           | 17.0%           |
|                  | South West               | 15.5%           | 18.8%           | 19.5%           |
|                  | West Midlands            | 18.9%           | 22.4%           | 21.6%           |
|                  | Yorkshire and The Humber | 17.4%           | 19.8%           | 20.2%           |
| <b>IMD</b>       | 1 (Most deprived)        | 15.3%           | 18.1%           | 19.0%           |
|                  | 2                        | 16.5%           | 19.1%           | 19.5%           |
|                  | 3                        | 16.4%           | 20.1%           | 19.7%           |
|                  | 4                        | 16.7%           | 18.6%           | 19.6%           |
|                  | 5 (Least deprived)       | 16.7%           | 19.6%           | 18.9%           |
| <b>Ethnicity</b> | Black                    | 14.5%           | 12.5%           | 11.1%           |
|                  | Mixed                    | 12.9%           | 0.0%            | 8.7%            |
|                  | Other                    | 8.3%            | 4.8%            | 14.7%           |
|                  | South Asian              | 8.6%            | 9.8%            | 10.3%           |
|                  | Unknown                  | 25.8%           | 27.3%           | 29.4%           |
|                  | White                    | 16.8%           | 19.9%           | 20.1%           |

To reduce the risk of secondary disclosure, all counted numbers in the baseline table were rounded to the nearest five

Period 1: 2019-01-01 to 2020-03-25; Period 2: 2020-03-26 to 2021-03-08; Period 3: 2021-03-09 to 2022-06-30

IMD (Index of Multiple Deprivation) quintile measured from patient-level address

BMI, Body Mass Index groups based on the NICE definitions



**eTable 8. Adjusted ORs of community-acquired sepsis 30-day mortality stratified by COVID-19 period**

| Group            | Category                                | OR (Community + Hospital) | OR2 (Community) | OR3 (Hospital)   |
|------------------|-----------------------------------------|---------------------------|-----------------|------------------|
| Age              | 18-39                                   | 0.19(0.16,0.23)           | 0.19(0.15,0.23) | 0.17(0.14,0.20)  |
| Age              | 40-49                                   | 0.59(0.51,0.68)           | 0.71(0.60,0.83) | 0.71(0.62,0.82)  |
| Age              | 60-69                                   | 1.36(1.24,1.48)           | 1.23(1.10,1.37) | 1.21(1.10,1.33)  |
| Age              | 70-79                                   | 1.81(1.67,1.96)           | 1.52(1.37,1.68) | 1.59(1.46,1.72)  |
| Age              | 80+                                     | 3.01(2.79,3.25)           | 2.44(2.22,2.69) | 2.53(2.34,2.74)  |
| Age              | <18                                     | 0.15(0.11,0.22)           | 0.10(0.05,0.16) | 0.09(0.05,0.13)  |
| Antibiotic count | Antibiotic count: 1                     | 0.97(0.92,1.02)           | 0.95(0.89,1.02) | 0.98(0.93,1.04)  |
| Antibiotic count | Antibiotic count: 2-3                   | 1.00(0.95,1.05)           | 1.07(1.00,1.14) | 1.02(0.97,1.08)  |
| Antibiotic count | Antibiotic count: 3+                    | 1.01(0.97,1.06)           | 1.05(0.98,1.12) | 1.05(0.99,1.10)  |
| Asthma           | With no oral steroid use                | 0.84(0.79,0.89)           | 0.88(0.81,0.95) | 0.87(0.82,0.92)  |
| Asthma           | With oral steroid use                   | 0.85(0.77,0.95)           | 1.09(0.94,1.25) | 0.97(0.86,1.09)  |
| BMI              | Obese I (30-34.9 kg/m <sup>2</sup> )    | 0.83(0.78,0.88)           | 0.83(0.76,0.90) | 0.83(0.78,0.89)  |
| BMI              | Obese II (35-39.9 kg/m <sup>2</sup> )   | 0.85(0.78,0.92)           | 0.81(0.72,0.90) | 0.89(0.81,0.97)  |
| BMI              | Obese III (40+ kg/m <sup>2</sup> )      | 0.92(0.83,1.01)           | 1.04(0.92,1.17) | 0.99(0.90,1.09)  |
| BMI              | Overweight (25-29.9 kg/m <sup>2</sup> ) | 0.92(0.87,0.96)           | 0.89(0.84,0.96) | 0.83(0.79,0.88)  |
| BMI              | Underweight (<18.5 kg/m <sup>2</sup> )  | 1.10(1.02,1.19)           | 1.12(1.00,1.25) | 1.16(1.06,1.27)  |
| CKD/RRT          | CKD stage 3a                            | 0.95(0.91,1.00)           | 1.02(0.95,1.09) | 0.90(0.86,0.96)  |
| CKD/RRT          | CKD stage 3b                            | 1.13(1.07,1.19)           | 1.25(1.16,1.35) | 1.12(1.06,1.19)  |
| CKD/RRT          | CKD stage 4                             | 1.54(1.43,1.65)           | 1.59(1.44,1.75) | 1.41(1.30,1.53)  |
| CKD/RRT          | CKD stage 5                             | 1.67(1.42,1.96)           | 1.79(1.44,2.22) | 1.37(1.15,1.63)  |
| CKD/RRT          | RRT (dialysis)                          | 1.24(1.05,1.46)           | 1.02(0.80,1.30) | 0.82(0.65,1.01)  |
| CKD/RRT          | RRT (transplant)                        | 0.54(0.39,0.73)           | 0.58(0.37,0.86) | 0.65(0.46,0.89)  |
| Diabetes         | Controlled                              | 0.93(0.90,0.97)           | 0.93(0.88,0.98) | 0.93(0.89,0.98)  |
| Diabetes         | Not controlled                          | 0.86(0.75,0.98)           | 0.84(0.69,1.02) | 0.81(0.69,0.94)  |
| Diabetes         | Without recent Hb1ac measure            | 0.99(0.89,1.1)            | 0.99(0.88,1.12) | 1.04(0.953,1.14) |
| Ethnicity        | Black                                   | 0.73(0.60,0.89)           | 0.89(0.69,1.13) | 0.64(0.51,0.79)  |
| Ethnicity        | Mixed                                   | 0.61(0.43,0.84)           | 1.05(0.71,1.52) | 0.73(0.53,1.00)  |
| Ethnicity        | Other                                   | 0.88(0.70,1.09)           | 1.11(0.83,1.47) | 1.06(0.83,1.34)  |
| Ethnicity        | South Asian                             | 0.81(0.73,0.90)           | 0.94(0.80,1.09) | 0.86(0.77,0.96)  |
| IMD              | IMD1(most deprived)                     | 1.25(1.18,1.32)           | 1.21(1.12,1.32) | 1.21(1.14,1.29)  |
| IMD              | IMD2                                    | 1.21(1.14,1.29)           | 1.16(1.07,1.25) | 1.08(1.01,1.15)  |
| IMD              | IMD3                                    | 1.09(1.03,1.16)           | 1.07(0.99,1.16) | 1.04(0.98,1.11)  |
| IMD              | IMD4                                    | 1.06(1.00,1.13)           | 1.03(0.95,1.12) | 1.02(0.96,1.09)  |
| Others           | Alcohol problems                        | 1.35(1.27,1.43)           | 1.46(1.35,1.57) | 1.35(1.27,1.43)  |
| Others           | Asplenia                                | 1.36(1.08,1.70)           | 1.27(0.94,1.70) | 0.83(0.62,1.08)  |
| Others           | Cancer (non haematological)             | 1.29(1.24,1.35)           | 1.26(1.2,1.34)  | 1.26(1.20,1.31)  |
| Others           | Chronic cardiac disease                 | 1.13(1.09,1.18)           | 1.14(1.08,1.20) | 1.14(1.09,1.18)  |
| Others           | Chronic liver disease                   | 1.84(1.67,2.02)           | 2.05(1.81,2.32) | 2.04(1.84,2.25)  |
| Others           | Chronic respiratory disease             | 1.19(1.14,1.24)           | 1.29(1.21,1.37) | 1.33(1.27,1.40)  |
| Others           | Dementia                                | 1.08(0.99,1.18)           | 1.14(1.00,1.31) | 1.15(1.03,1.29)  |
| Others           | Haematological malignancy               | 0.97(0.88,1.06)           | 0.94(0.83,1.06) | 0.88(0.80,0.98)  |
| Others           | Hypertension                            | 0.97(0.93,1.01)           | 0.98(0.93,1.04) | 0.94(0.90,0.98)  |

|         |                                        |                 |                 |                 |
|---------|----------------------------------------|-----------------|-----------------|-----------------|
| Others  | Immunosuppressive condition            | 1.03(0.96,1.11) | 0.99(0.90,1.10) | 0.98(0.90,1.06) |
| Others  | Learning disability                    | 1.38(1.17,1.61) | 1.35(1.07,1.68) | 0.98(0.80,1.18) |
| Others  | Other neurological disease             | 0.99(0.92,1.07) | 1.00(0.90,1.11) | 1.01(0.93,1.11) |
| Others  | Potential Care Home                    | 0.80(0.76,0.85) | 1.21(1.08,1.36) | 1.28(1.15,1.41) |
| Others  | Rheumatoid arthritis/ lupus/ psoriasis | 1.00(0.94,1.06) | 1.02(0.94,1.11) | 1.04(0.98,1.11) |
| Others  | Severe mental illness                  | 0.90(0.81,1.01) | 1.00(0.86,1.16) | 0.92(0.81,1.04) |
| Others  | Stroke                                 | 1.03(0.98,1.09) | 0.99(0.93,1.06) | 0.97(0.92,1.03) |
| Region  | East Midlands                          | 0.95(0.91,1.01) | 1.14(1.06,1.22) | 1.00(0.94,1.05) |
| Region  | London                                 | 0.80(0.72,0.88) | 0.98(0.86,1.11) | 0.84(0.76,0.94) |
| Region  | North East                             | 1.04(0.95,1.14) | 1.15(1.01,1.30) | 1.06(0.96,1.17) |
| Region  | North West                             | 1.18(1.10,1.26) | 1.27(1.16,1.39) | 1.09(1.01,1.17) |
| Region  | South East                             | 0.76(0.70,0.82) | 0.86(0.78,0.96) | 0.79(0.72,0.86) |
| Region  | South West                             | 0.98(0.92,1.05) | 1.04(0.95,1.13) | 0.96(0.90,1.03) |
| Region  | West Midlands                          | 1.10(0.99,1.21) | 1.37(1.19,1.57) | 1.15(1.04,1.26) |
| Region  | Yorkshire and the Humber               | 1.08(1.02,1.15) | 1.23(1.13,1.33) | 1.17(1.10,1.25) |
| Sex     | Male                                   | 0.97(0.94,1.01) | 0.97(0.92,1.02) | 0.96(0.92,1.00) |
| Smoking | Current                                | 1.58(1.49,1.68) | 1.61(1.49,1.75) | 1.68(1.57,1.79) |
| Smoking | Former                                 | 1.07(1.03,1.11) | 1.1(1.04,1.16)  | 1.15(1.10,1.20) |
| Tx      | Kidney transplant                      | 0.62(0.47,0.79) | 0.54(0.37,0.77) | 0.59(0.43,0.79) |
| Tx      | Other organ transplant                 | 0.95(0.61,1.43) | 0.46(0.19,0.95) | 0.84(0.49,1.37) |

Models were adjusted for age using a 4-knot cubic spline, except for estimation of age group relative odds of 30-day mortality; and adjusted for sex, except for estimation of sex group relative odds of 30-day mortality; and stratified by region, except for IMD group relative odds of 30-day mortality.

Abbreviations: IMD, index of multiple deprivation; BMI, body mass index;

Tx, transplant; CKD, chronic kidney disease; RRT, renal replacement therapy.

The number of prior antibiotic prescriptions (one year plus six weeks to six weeks before the index date)

Reference sub-group:

age: 50-59 years

sex: female

region: East of England

IMD: the least deprived quintile

ethnicity: white

BMI: healthy range (18.5 – 24.9 kg/m<sup>2</sup>)

smoking: never

prior antibiotic count: 0

Patients without the disease were used as the reference for other clinical conditions.

**eTable 9. ORs of developing non-COVID-19 sepsis for factors stratified by sepsis type (Complete case analysis)**

|                                         | <b>OR (Community + Hospital)</b> | <b>OR2 (Community)</b> | <b>OR3 (Hospital)</b> |
|-----------------------------------------|----------------------------------|------------------------|-----------------------|
| IMD                                     |                                  |                        |                       |
| IMD 1 (Most deprived)                   | 1.79 (1.76-1.82)                 | 1.88 (1.85-1.92)       | 1.45 (1.39-1.50)      |
| IMD 2                                   | 1.48 (1.45-1.50)                 | 1.53 (1.50-1.56)       | 1.29 (1.24-1.34)      |
| IMD 3                                   | 1.24 (1.22-1.26)                 | 1.27 (1.25-1.29)       | 1.14 (1.10-1.18)      |
| IMD 4                                   | 1.14 (1.12-1.16)                 | 1.15 (1.13-1.17)       | 1.12 (1.08-1.16)      |
| Ethnicity                               |                                  |                        |                       |
| Mixed                                   | 0.95 (0.90-1.01)                 | 0.96 (0.90-1.02)       | 0.97 (0.86-1.09)      |
| South Asian                             | 1.08 (1.05-1.11)                 | 1.08 (1.05-1.11)       | 1.07 (1.02-1.12)      |
| Black                                   | 0.96 (0.92-1.00)                 | 0.96 (0.92-1.01)       | 0.89 (0.82-0.98)      |
| Other                                   | 0.80 (0.76-0.85)                 | 0.78 (0.74-0.83)       | 0.86 (0.77-0.94)      |
| BMI                                     |                                  |                        |                       |
| Underweight (<18.5 kg/m <sup>2</sup> )  | 1.72 (1.67-1.75)                 | 1.73 (1.68-1.79)       | 1.67 (1.58-1.77)      |
| Overweight (25-29.9 kg/m <sup>2</sup> ) | 0.86 (0.85-0.87)                 | 0.86 (0.85-0.87)       | 0.84 (0.81-0.86)      |
| Obese I (30-34.9 kg/m <sup>2</sup> )    | 1.04 (1.02-1.05)                 | 1.07 (1.05-1.10)       | 0.92 (0.89-0.95)      |
| Obese II (35-39.9 kg/m <sup>2</sup> )   | 1.39 (1.36-1.41)                 | 1.46 (1.43-1.50)       | 1.12 (1.07-1.17)      |
| Obese III (40+ kg/m <sup>2</sup> )      | 2.23 (2.17-2.28)                 | 2.54 (2.48-2.61)       | 1.29 (1.22-1.37)      |
| Smoking                                 |                                  |                        |                       |
| Former                                  | 1.34 (1.33-1.36)                 | 1.34 (1.34-1.36)       | 1.35 (1.32-1.38)      |
| Current                                 | 1.80 (1.78-1.84)                 | 1.92 (1.89-1.96)       | 1.46 (1.42-1.51)      |

Crude ORs of sepsis by IMD quintile, ethnicity, BMI, smoking history and stratified by type of sepsis

Reference groups:

IMD quintile: the least deprived quintile (IMD 5)

Ethnicity: white

BMI: healthy range (18.5 – 24.9 kg/m<sup>2</sup>)

Smoking: never (Smoking status identified from the most recent clinical records)

Abbreviations:

IMD (Index of Multiple Deprivation) quintile measured from patient-level address

BMI, Body Mass Index (from the most recent clinical records)

**eTable 10. Adjusted ORs of developing non-COVID-19 sepsis for clinical characteristics stratified by sepsis type (Complete case analysis)**

| type                                   | OR (Community + Hospital) | OR2 (Community)  | OR3 (Hospital)      |
|----------------------------------------|---------------------------|------------------|---------------------|
| Potential Care Home                    | 2.95 (2.86-3.05)          | 2.94 (2.85-3.04) | 2.87 (2.6-3.17)     |
| CKD stage 3a                           | 1.23 (1.2-1.26)           | 1.23 (1.2-1.27)  | 1.19 (1.12-1.27)    |
| CKD stage 3b                           | 1.67 (1.62-1.71)          | 1.66 (1.61-1.71) | 1.76 (1.63-1.9)     |
| CKD stage 4                            | 2.53 (2.43-2.64)          | 2.45 (2.34-2.56) | 3.22 (2.86-3.63)    |
| CKD stage 5                            | 6.01 (5.41-6.67)          | 5.45 (4.86-6.1)  | 12.3 (9.38-16.15)   |
| RRT (dialysis)                         | 7.52 (6.79-8.34)          | 6.43 (5.73-7.22) | 18.66 (14.56-23.92) |
| RRT (transplant)                       | 6.72 (4.78-9.44)          | 6.1 (4.15-8.99)  | 12.59 (5.92-26.74)  |
| With no oral steroid use               | 1.01 (0.99-1.03)          | 1.02 (0.99-1.04) | 1.02 (0.97-1.08)    |
| With oral steroid use                  | 0.86 (0.83-0.9)           | 0.87 (0.83-0.91) | 0.86 (0.77-0.96)    |
| Controlled                             | 1.46 (1.44-1.49)          | 1.5 (1.47-1.53)  | 1.31 (1.25-1.38)    |
| Not controlled                         | 2.54 (2.38-2.7)           | 2.69 (2.51-2.88) | 1.92 (1.61-2.28)    |
| Without recent Hb1ac measure           | 1.67 (1.59-1.75)          | 1.72 (1.63-1.81) | 1.41 (1.24-1.6)     |
| Kidney transplant                      | 1.43 (1.05-1.96)          | 1.61 (1.13-2.3)  | 0.84 (0.43-1.65)    |
| Other organ transplant                 | 2.06 (1.65-2.56)          | 2.03 (1.58-2.6)  | 2.53 (1.53-4.17)    |
| Hypertension                           | 1.1 (1.08-1.12)           | 1.11 (1.09-1.13) | 1.07 (1.02-1.11)    |
| Chronic respiratory disease            | 1.49 (1.46-1.52)          | 1.5 (1.47-1.54)  | 1.46 (1.38-1.54)    |
| Chronic cardiac disease                | 1.39 (1.36-1.41)          | 1.37 (1.34-1.4)  | 1.55 (1.48-1.62)    |
| Cancer (non haematological)            | 2.38 (2.34-2.42)          | 1.72 (1.69-1.76) | 7.71 (7.4-8.04)     |
| Haematological malignancy              | 2.57 (2.42-2.73)          | 1.83 (1.7-1.96)  | 4.72 (4.15-5.36)    |
| Chronic liver disease                  | 2.98 (2.82-3.14)          | 2.97 (2.8-3.15)  | 3.35 (2.93-3.84)    |
| Stroke                                 | 1.48 (1.45-1.52)          | 1.49 (1.45-1.53) | 1.44 (1.34-1.55)    |
| Dementia                               | 1.34 (1.28-1.41)          | 1.35 (1.28-1.43) | 1.24 (1.05-1.46)    |
| Other neurological disease             | 2.30 (2.22-2.39)          | 2.41 (2.31-2.51) | 1.94 (1.75-2.16)    |
| Asplenia                               | 1.05 (0.94-1.16)          | 1.05 (0.93-1.19) | 1.33 (1.04-1.71)    |
| Rheumatoid arthritis/ lupus/ psoriasis | 1.28 (1.24-1.31)          | 1.3 (1.27-1.34)  | 1.2 (1.12-1.28)     |
| Immunosuppressive condition            | 2.16 (2.06-2.27)          | 1.67 (1.57-1.77) | 5.27 (4.73-5.86)    |
| Learning disability                    | 3.66 (3.38-3.95)          | 4 (3.67-4.37)    | 2.7 (2.21-3.31)     |
| Severe mental illness                  | 1.92 (1.83-2.02)          | 2.06 (1.95-2.17) | 1.4 (1.22-1.6)      |
| Alcohol problems                       | 1.39 (1.35-1.42)          | 1.42 (1.38-1.46) | 1.26 (1.18-1.34)    |
| Antibiotic count: 1                    | 1.68 (1.65-1.71)          | 1.65 (1.62-1.69) | 1.76 (1.68-1.84)    |
| Antibiotic count: 2-3                  | 2.26 (2.22-2.31)          | 2.24 (2.19-2.29) | 2.34 (2.22-2.47)    |
| Antibiotic count: 3+                   | 3.45 (3.37-3.52)          | 3.43 (3.35-3.52) | 3.57 (3.37-3.79)    |

Reference groups:

Clinical characteristics: the patients without the clinical disease.

The number of prior antibiotic prescriptions: antibiotic count: 0.

Models were adjusted for all comorbidities\*

All comorbidities\* (Hypertension, chronic cardiac disease, diabetes, stroke, chronic kidney disease or renal replacement therapy) and asthma, cancer (non-haematological and haematological), chronic liver disease, dementia, other neurological disease (including motor neuron disease, myasthenia gravis, multiple sclerosis, Parkinson's disease, cerebral palsy, quadriplegia or hemiplegia, and progressive cerebellar disease), organ kidney transplant, asplenia (due to splenectomy or spleen dysfunction, including sickle cell disease), rheumatoid arthritis/lupus/psoriasis, other immunosuppressive conditions, learning disability, severe mental ill, the number of prior antibiotic prescription from one year and six week to six week before the index time (indicating the infection history)

Abbreviations:

CKD, chronic kidney disease; RRT, renal replacement therapy.

The number of prior antibiotic prescriptions (one year plus six weeks to six weeks before the index date), The ORs for the number of antibiotics given within six weeks before the index date can be found in Supplementary eFigure 5.

**eTable 11. Association between index of multiple deprivations (IMD) quintile and risk of hospital admission for Sepsis (Complete case analysis)**

|                              | <b>OR (Community + Hospital)</b> | <b>OR2 (Community)</b> | <b>OR3 (Hospital)</b> |
|------------------------------|----------------------------------|------------------------|-----------------------|
| <b>IMD 1 (Most deprived)</b> |                                  |                        |                       |
| Unadjusted                   | 1.79 (1.76-1.82)                 | 1.88 (1.85-1.92)       | 1.45 (1.39-1.50)      |
| Model 1                      | 1.75 (1.71-1.80)                 | 1.83 (1.79-1.88)       | 1.48 (1.41-1.56)      |
| Model 2                      | 1.59 (1.56-1.62)                 | 1.67 (1.64-1.71)       | 1.31 (1.26-1.36)      |
| Model 3 (fully adjusted)     | 1.38 (1.36-1.40)                 | 1.42 (1.40-1.44)       | 1.25 (1.21-1.30)      |
| <b>IMD 2</b>                 |                                  |                        |                       |
| Unadjusted                   | 1.48 (1.45-1.50)                 | 1.53 (1.50-1.56)       | 1.29 (1.24-1.34)      |
| Model 1                      | 1.46 (1.42-1.49)                 | 1.50 (1.46-1.54)       | 1.30 (1.24-1.37)      |
| Model 2                      | 1.36 (1.34-1.39)                 | 1.41 (1.38-1.44)       | 1.20 (1.16-1.25)      |
| Model 3 (fully adjusted)     | 1.26 (1.23-1.28)                 | 1.28 (1.25-1.30)       | 1.16 (1.12-1.21)      |
| <b>IMD 3</b>                 |                                  |                        |                       |
| Unadjusted                   | 1.24 (1.22-1.26)                 | 1.27 (1.25-1.29)       | 1.14 (1.10-1.18)      |
| Model 1                      | 1.22 (1.19-1.25)                 | 1.24 (1.21-1.28)       | 1.15 (1.09-1.21)      |
| Model 2                      | 1.18 (1.16-1.20)                 | 1.21 (1.19-1.23)       | 1.09 (1.05-1.13)      |
| Model 3 (fully adjusted)     | 1.12 (1.11-1.14)                 | 1.14 (1.12-1.16)       | 1.09 (1.05-1.13)      |
| <b>IMD 4</b>                 |                                  |                        |                       |
| Unadjusted                   | 1.14 (1.12-1.16)                 | 1.15 (1.13-1.17)       | 1.12 (1.08-1.16)      |
| Model 1                      | 1.13 (1.10-1.16)                 | 1.13 (1.10-1.17)       | 1.12 (1.06-1.18)      |
| Model 2                      | 1.11 (1.10-1.13)                 | 1.12 (1.10-1.14)       | 1.09 (1.05-1.14)      |
| Model 3 (fully adjusted)     | 1.09 (1.07-1.10)                 | 1.09 (1.07-1.11)       | 1.08 (1.04-1.11)      |

IMD (Index of Multiple Deprivation) quintile measured from patient-level address.

Odds ratios are compared to the least deprived quintile (IMD 5)

Model 1 – adjusted for interaction term between IMD and time (Period 1: 2019-01-01 to 2020-03-25; Period 2: 2020-03-26 to 2021-03-08; Period 3: 2021-03-09 to 2022-06-30)

Model 2 – adjusted for cardiometabolic comorbidities\*

Model 3 (fully adjusted model) – adjust for all comorbidities\*\*

Cardiometabolic comorbidities\* Hypertension, chronic cardiac disease, diabetes, stroke, chronic kidney disease or renal replacement therapy)

All comorbidities\*\* Cardiometabolic comorbidities and asthma, cancer (non-haematological and haematological), chronic liver disease, dementia, other neurological disease (including motor neuron disease, myasthenia gravis, multiple sclerosis, Parkinson's disease, cerebral palsy, quadriplegia or hemiplegia, and progressive cerebellar disease), organ kidney transplant, asplenia (due to splenectomy or spleen dysfunction, including sickle cell disease), rheumatoid arthritis/lupus/psoriasis, other immunosuppressive conditions, learning disability, several mental ill, the number of prior antibiotic prescription from one year and six week to six week before the index time (indicating the infection history)

**eTable 12. Adjusted ORs of community-acquired sepsis 30-day mortality stratified by COVID-19 period (Complete risk analysis)**

| Group            | Category                                | OR (Community + Hospital) | OR2 (Community) | OR3 (Hospital)  |
|------------------|-----------------------------------------|---------------------------|-----------------|-----------------|
| Age              | 18-39                                   | 0.20(0.16,0.24)           | 0.16(0.11,0.28) | 0.17(0.14,0.26) |
| Age              | 40-49                                   | 0.65(0.58,0.73)           | 0.71(0.62,0.89) | 0.75(0.62,0.83) |
| Age              | 60-69                                   | 1.38(1.25,1.43)           | 1.23(1.13,1.39) | 1.24(1.19,1.33) |
| Age              | 70-79                                   | 1.85(1.67,1.96)           | 1.54(1.38,1.67) | 1.59(1.45,1.78) |
| Age              | 80+                                     | 3.02(2.74,3.25)           | 2.48(2.26,2.67) | 2.58(2.38,2.76) |
| Age              | <18                                     | 0.19(0.11,0.22)           | 0.11(0.06,0.15) | 0.09(0.05,0.17) |
| Antibiotic count | Antibiotic count: 1                     | 0.99(0.91,1.07)           | 0.99(0.85,1.06) | 0.97(0.94,1.02) |
| Antibiotic count | Antibiotic count: 2-3                   | 1.04(0.96,1.04)           | 1.03(0.99,1.06) | 1.04(0.97,1.02) |
| Antibiotic count | Antibiotic count: 3+                    | 1.02(0.97,1.06)           | 1.03(0.98,1.13) | 1.02(0.97,1.19) |
| Asthma           | With no oral steroid use                | 0.85(0.78,0.84)           | 0.82(0.87,0.91) | 0.85(0.84,0.99) |
| Asthma           | With oral steroid use                   | 0.89(0.72,0.94)           | 1.02(0.96,1.26) | 0.97(0.86,1.09) |
| BMI              | Obese I (30-34.9 kg/m <sup>2</sup> )    | 0.87(0.79,0.88)           | 0.82(0.78,0.92) | 0.86(0.74,0.91) |
| BMI              | Obese II (35-39.9 kg/m <sup>2</sup> )   | 0.82(0.73,0.96)           | 0.82(0.76,0.97) | 0.89(0.86,0.91) |
| BMI              | Obese III (40+ kg/m <sup>2</sup> )      | 0.91(0.88,1.01)           | 1.03(0.95,1.14) | 0.98(0.95,1.09) |
| BMI              | Overweight (25-29.9 kg/m <sup>2</sup> ) | 0.92(0.89,0.98)           | 0.88(0.81,0.96) | 0.85(0.72,0.81) |
| BMI              | Underweight (<18.5 kg/m <sup>2</sup> )  | 1.18(1.07,1.20)           | 1.15(1.06,1.28) | 1.16(1.06,1.27) |
| CKD/RRT          | CKD stage 3a                            | 0.97(0.91,1.06)           | 1.03(0.95,1.05) | 0.94(0.86,1.01) |
| CKD/RRT          | CKD stage 3b                            | 1.11(1.01,1.23)           | 1.29(1.18,1.37) | 1.12(1.06,1.17) |
| CKD/RRT          | CKD stage 4                             | 1.51(1.43,1.67)           | 1.52(1.41,1.79) | 1.43(1.32,1.53) |
| CKD/RRT          | CKD stage 5                             | 1.65(1.48,1.96)           | 1.75(1.44,2.24) | 1.36(1.15,1.65) |
| CKD/RRT          | RRT (dialysis)                          | 1.23(1.02,1.41)           | 1.08(0.81,1.35) | 0.82(0.66,1.05) |
| CKD/RRT          | RRT (transplant)                        | 0.58(0.39,0.74)           | 0.53(0.37,0.84) | 0.66(0.46,0.89) |
| Diabetes         | Controlled                              | 0.96(0.91,0.98)           | 0.92(0.83,0.94) | 0.94(0.89,0.98) |
| Diabetes         | Not controlled                          | 0.86(0.76,0.98)           | 0.84(0.61,1.04) | 0.83(0.63,0.99) |
| Diabetes         | Without recent Hb1ac measure            | 0.92(0.84,1.10)           | 0.99(0.84,1.17) | 1.06(0.93,1.17) |
| Ethnicity        | Black                                   | 0.79(0.66,0.84)           | 0.89(0.63,1.13) | 0.64(0.52,0.71) |
| Ethnicity        | Mixed                                   | 0.66(0.46,0.87)           | 1.09(0.79,1.52) | 0.78(0.52,1.04) |
| Ethnicity        | Other                                   | 0.81(0.73,1.02)           | 1.17(0.89,1.47) | 1.04(0.88,1.34) |
| Ethnicity        | South Asian                             | 0.85(0.73,0.93)           | 0.92(0.88,1.05) | 0.85(0.71,0.98) |
| IMD              | IMD1(most deprived)                     | 1.25(1.18,1.32)           | 1.21(1.12,1.32) | 1.21(1.14,1.29) |
| IMD              | IMD2                                    | 1.21(1.14,1.29)           | 1.16(1.07,1.25) | 1.08(1.01,1.15) |
| IMD              | IMD3                                    | 1.08(1.02,1.15)           | 1.06(0.99,1.16) | 1.03(0.97,1.11) |
| IMD              | IMD4                                    | 1.05(0.99,1.13)           | 1.02(0.95,1.12) | 1.01(0.95,1.09) |
| Others           | Alcohol problems                        | 1.35(1.24,1.43)           | 1.41(1.36,1.53) | 1.31(1.24,1.42) |
| Others           | Asplenia                                | 1.35(1.04,1.73)           | 1.28(0.93,1.79) | 0.81(0.67,1.08) |
| Others           | Cancer (non haematological)             | 1.28(1.26,1.32)           | 1.29(1.20,1.32) | 1.26(1.24,1.37) |
| Others           | Chronic cardiac disease                 | 1.12(1.07,1.19)           | 1.13(1.06,1.23) | 1.11(1.05,1.19) |
| Others           | Chronic liver disease                   | 1.82(1.67,2.24)           | 2.04(1.85,2.31) | 2.01(1.88,2.23) |
| Others           | Chronic respiratory disease             | 1.18(1.13,1.24)           | 1.22(1.27,1.31) | 1.37(1.25,1.42) |
| Others           | Dementia                                | 1.09(0.97,1.19)           | 1.16(1.00,1.32) | 1.17(1.05,1.21) |
| Others           | Haematological malignancy               | 0.92(0.88,1.03)           | 0.94(0.84,1.06) | 0.88(0.78,0.93) |

|         |                                        |                 |                 |                 |
|---------|----------------------------------------|-----------------|-----------------|-----------------|
| Others  | Hypertension                           | 0.96(0.93,1.01) | 0.99(0.97,1.03) | 0.91(0.89,0.98) |
| Others  | Immunosuppressive condition            | 1.08(0.96,1.14) | 0.99(0.96,1.11) | 0.92(0.87,1.03) |
| Others  | Learning disability                    | 1.34(1.18,1.69) | 1.31(1.06,1.62) | 0.98(0.85,1.15) |
| Others  | Other neurological disease             | 0.96(0.93,1.05) | 1.05(0.94,1.16) | 1.06(0.93,1.11) |
| Others  | Potential Care Home                    | 0.88(0.74,0.83) | 1.28(1.09,1.32) | 1.28(1.19,1.42) |
| Others  | Rheumatoid arthritis/ lupus/ psoriasis | 1.06(0.98,1.07) | 1.05(0.95,1.11) | 1.06(0.98,1.16) |
| Others  | Severe mental illness                  | 0.96(0.81,1.01) | 1.06(0.86,1.13) | 0.97(0.89,1.06) |
| Others  | Stroke                                 | 1.08(0.99,1.09) | 0.97(0.91,1.07) | 0.96(0.93,1.01) |
| Region  | East Midlands                          | 0.99(0.91,1.01) | 1.11(1.06,1.27) | 1.01(0.96,1.09) |
| Region  | London                                 | 0.84(0.79,0.86) | 0.91(0.82,1.14) | 0.88(0.73,0.94) |
| Region  | North East                             | 1.03(0.93,1.14) | 1.12(1.04,1.36) | 1.02(0.93,1.17) |
| Region  | North West                             | 1.12(1.17,1.21) | 1.25(1.14,1.36) | 1.01(1.02,1.17) |
| Region  | South East                             | 0.76(0.73,0.82) | 0.89(0.74,0.93) | 0.80(0.75,0.87) |
| Region  | South West                             | 0.96(0.95,1.01) | 1.05(0.98,1.18) | 0.98(0.91,1.09) |
| Region  | West Midlands                          | 1.10(0.98,1.21) | 1.34(1.17,1.54) | 1.13(1.08,1.27) |
| Region  | Yorkshire and the Humber               | 1.08(1.06,1.13) | 1.23(1.19,1.35) | 1.13(1.10,1.21) |
| Sex     | Male                                   | 0.96(0.82,1.01) | 0.96(0.92,1.02) | 0.95(0.92,1.02) |
| Smoking | Current                                | 1.55(1.43,1.62) | 1.69(1.44,1.74) | 1.63(1.57,1.76) |
| Smoking | Former                                 | 1.04(1.01,1.18) | 1.10(1.04,1.12) | 1.17(1.06,1.29) |
| Tx      | Kidney transplant                      | 0.61(0.47,0.76) | 0.56(0.32,0.75) | 0.56(0.46,0.78) |
| Tx      | Other organ transplant                 | 0.99(0.66,1.45) | 0.45(0.13,0.96) | 0.85(0.41,1.33) |

Models were adjusted for age using a 4-knot cubic spline, except for estimation of age group relative odds of 30-day mortality; and adjusted for sex, except for estimation of sex group relative odds of 30-day mortality; and stratified by region, except for IMD group relative odds of 30-day mortality.

Abbreviations: IMD, index of multiple deprivation; BMI, body mass index;

Tx, transplant; CKD, chronic kidney disease; RRT, renal replacement therapy.

The number of prior antibiotic prescriptions (one year plus six weeks to six weeks before the index date)

Reference sub-group:

age: 50-59 years

sex: female

region: East of England

IMD: the least deprived quintile

ethnicity: white

BMI: healthy range (18.5 – 24.9 kg/m<sup>2</sup>)

smoking: never

prior antibiotic count: 0

Patients without the disease were used as the reference for other clinical conditions.

**eTable 13. Adjusted ORs of community-acquired sepsis 30-day mortality (COVID-19 period as a moderator)**

| Group            | Category                                | OR (95% CI)     |
|------------------|-----------------------------------------|-----------------|
| Age              | < 18                                    | 0.13(0.12,0.14) |
| Age              | 18-39                                   | 0.17(0.12,0.22) |
| Age              | 40-49                                   | 0.21(0.18,0.24) |
| Age              | 60-69                                   | 1.37(1.27,1.47) |
| Age              | 70-79                                   | 1.84(1.72,1.97) |
| Age              | > 80                                    | 3.10(2.90,3.31) |
| Antibiotic count | Antibiotic count: 1                     | 1.00(0.95,1.04) |
| Antibiotic count | Antibiotic count: 2-3                   | 1.02(0.97,1.06) |
| Antibiotic count | Antibiotic count: 3+                    | 1.04(0.99,1.08) |
| Asthma           | With no oral steroid use                | 0.85(0.81,0.90) |
| Asthma           | With oral steroid use                   | 0.89(0.81,0.98) |
| BMI              | Obese I (30-34.9 kg/m <sup>2</sup> )    | 0.84(0.80,0.88) |
| BMI              | Obese II (35-39.9 kg/m <sup>2</sup> )   | 0.85(0.79,0.92) |
| BMI              | Obese III (40+ kg/m <sup>2</sup> )      | 0.94(0.86,1.02) |
| BMI              | Overweight (25-29.9 kg/m <sup>2</sup> ) | 0.92(0.88,0.96) |
| BMI              | Underweight (<18.5 kg/m <sup>2</sup> )  | 1.10(1.02,1.18) |
| CKD/RRT          | CKD stage 3a                            | 0.98(0.94,1.03) |
| CKD/RRT          | CKD stage 3b                            | 1.17(1.12,1.23) |
| CKD/RRT          | CKD stage 4                             | 1.57(1.47,1.68) |
| CKD/RRT          | CKD stage 5                             | 1.69(1.46,1.93) |
| CKD/RRT          | RRT (dialysis)                          | 1.27(1.10,1.46) |
| CKD/RRT          | RRT (transplant)                        | 0.61(0.47,0.79) |
| Diabetes         | Controlled                              | 0.96(0.93,0.99) |
| Diabetes         | Not controlled                          | 0.89(0.78,1.00) |
| Diabetes         | Without recent Hb1ac measure            | 1.02(0.93,1.12) |
| Ethnicity        | Black                                   | 0.82(0.69,0.97) |
| Ethnicity        | Mixed                                   | 0.74(0.55,0.97) |
| Ethnicity        | Other                                   | 0.83(0.67,1.00) |
| Ethnicity        | South Asian                             | 0.79(0.72,0.87) |
| IMD              | IMD1(most deprived)                     | 1.18(1.12,1.24) |
| IMD              | IMD2                                    | 1.20(1.14,1.26) |
| IMD              | IMD3                                    | 1.09(1.04,1.15) |
| IMD              | IMD4                                    | 1.06(1.01,1.12) |
| Others           | Alcohol problems                        | 1.33(1.26,1.39) |
| Others           | Asplenia                                | 1.30(1.06,1.58) |
| Others           | Cancer (non haematological)             | 1.21(1.17,1.26) |
| Others           | Chronic cardiac disease                 | 1.16(1.13,1.20) |
| Others           | Chronic liver disease                   | 1.82(1.67,1.98) |
| Others           | Chronic respiratory disease             | 1.21(1.17,1.26) |
| Others           | Dementia                                | 1.10(1.01,1.19) |
| Others           | Haematological malignancy               | 0.90(0.84,0.96) |
| Others           | Hypertension                            | 1.01(0.97,1.04) |
| Others           | Immunosuppressive condition             | 0.98(0.92,1.03) |
| Others           | Learning disability                     | 1.36(1.17,1.58) |
| Others           | Other neurological disease              | 1.00(0.93,1.07) |
| Others           | Potential Care Home                     | 0.81(0.77,0.86) |



|         |                                        |                 |
|---------|----------------------------------------|-----------------|
| Others  | Rheumatoid arthritis/ lupus/ psoriasis | 1.03(0.98,1.09) |
| Others  | Severe mental illness                  | 0.93(0.84,1.03) |
| Others  | Stroke                                 | 1.07(1.02,1.11) |
| Region  | East Midlands                          | 0.96(0.92,1.01) |
| Region  | London                                 | 0.84(0.77,0.91) |
| Region  | North East                             | 1.06(0.98,1.15) |
| Region  | North West                             | 1.15(1.08,1.22) |
| Region  | South East                             | 0.80(0.75,0.86) |
| Region  | South West                             | 0.98(0.93,1.04) |
| Region  | West Midlands                          | 1.13(1.03,1.23) |
| Region  | Yorkshire and the Humber               | 1.10(1.04,1.16) |
| Sex     | Male                                   | 1.00(0.97,1.03) |
| Smoking | Current                                | 1.60(1.51,1.68) |
| Smoking | Former                                 | 1.10(1.06,1.14) |
| Tx      | Kidney transplant                      | 0.70(0.56,0.86) |
| Tx      | Other organ transplant                 | 0.96(0.66,1.37) |

Models were adjusted for age using a 4-knot cubic spline, except for estimation of age group relative odds of 30-day mortality; and adjusted for sex, except for estimation of sex group relative odds of 30-day mortality; and stratified by region, except for IMD group relative odds of 30-day mortality. Abbreviations: IMD, index of multiple deprivation; BMI, body mass index; Tx, transplant; CKD, chronic kidney disease; RRT, renal replacement therapy.

The relative odds of 30-day mortality presented in this figure can be found in table S6 of the Supplementary material.

The number of prior antibiotic prescriptions (one year plus six weeks to six weeks before the index date)

Reference sub-group:

age: 50-59 years

sex: female

region: East of England

IMD: the least deprived quintile

ethnicity: white

BMI: healthy range (18.5 – 24.9 kg/m<sup>2</sup>)

smoking: never

prior antibiotic count: 0

Patients without the disease were used as the reference for other clinical conditions.

**eTable 14. The underlying number of Figure 2**

| Calendar month | IMD               | Community + hospital |                | community |                | hospital |                | population |
|----------------|-------------------|----------------------|----------------|-----------|----------------|----------|----------------|------------|
|                |                   | count                | incidence rate | count     | incidence rate | count    | incidence rate |            |
| 01/01/2019     | 1(most deprived)  | 1965                 | 0.448          | 1595      | 0.364          | 365      | 0.083          | 4386440    |
| 01/01/2019     | 2                 | 1915                 | 0.445          | 1555      | 0.361          | 360      | 0.084          | 4303400    |
| 01/01/2019     | 3                 | 1885                 | 0.407          | 1495      | 0.323          | 390      | 0.084          | 4630650    |
| 01/01/2019     | 4                 | 1680                 | 0.384          | 1315      | 0.3            | 360      | 0.082          | 4378515    |
| 01/01/2019     | 5(least deprived) | 1510                 | 0.368          | 1170      | 0.285          | 340      | 0.083          | 4104170    |
| 01/02/2019     | 1(most deprived)  | 1660                 | 0.378          | 1340      | 0.305          | 320      | 0.073          | 4392915    |
| 01/02/2019     | 2                 | 1505                 | 0.349          | 1195      | 0.277          | 310      | 0.072          | 4309910    |
| 01/02/2019     | 3                 | 1625                 | 0.35           | 1270      | 0.274          | 350      | 0.075          | 4637510    |
| 01/02/2019     | 4                 | 1490                 | 0.34           | 1220      | 0.278          | 270      | 0.062          | 4384475    |
| 01/02/2019     | 5(least deprived) | 1255                 | 0.306          | 970       | 0.236          | 280      | 0.068          | 4107515    |
| 01/03/2019     | 1(most deprived)  | 1670                 | 0.38           | 1345      | 0.306          | 325      | 0.074          | 4397065    |
| 01/03/2019     | 2                 | 1580                 | 0.366          | 1275      | 0.295          | 305      | 0.071          | 4316175    |
| 01/03/2019     | 3                 | 1630                 | 0.351          | 1280      | 0.276          | 350      | 0.075          | 4641915    |
| 01/03/2019     | 4                 | 1525                 | 0.348          | 1190      | 0.271          | 330      | 0.075          | 4387325    |
| 01/03/2019     | 5(least deprived) | 1290                 | 0.314          | 1010      | 0.246          | 280      | 0.068          | 4108040    |
| 01/04/2019     | 1(most deprived)  | 1635                 | 0.372          | 1325      | 0.301          | 310      | 0.07           | 4398475    |
| 01/04/2019     | 2                 | 1480                 | 0.343          | 1185      | 0.274          | 295      | 0.068          | 4318495    |
| 01/04/2019     | 3                 | 1665                 | 0.359          | 1300      | 0.28           | 365      | 0.079          | 4641910    |
| 01/04/2019     | 4                 | 1550                 | 0.353          | 1220      | 0.278          | 330      | 0.075          | 4387120    |
| 01/04/2019     | 5(least deprived) | 1270                 | 0.309          | 995       | 0.242          | 275      | 0.067          | 4107460    |
| 01/05/2019     | 1(most deprived)  | 1650                 | 0.374          | 1315      | 0.298          | 340      | 0.077          | 4408515    |
| 01/05/2019     | 2                 | 1465                 | 0.338          | 1180      | 0.273          | 285      | 0.066          | 4328265    |
| 01/05/2019     | 3                 | 1590                 | 0.342          | 1270      | 0.273          | 320      | 0.069          | 4649560    |
| 01/05/2019     | 4                 | 1495                 | 0.34           | 1150      | 0.262          | 345      | 0.079          | 4394270    |
| 01/05/2019     | 5(least deprived) | 1215                 | 0.295          | 945       | 0.23           | 270      | 0.066          | 4112875    |
| 01/06/2019     | 1(most deprived)  | 1455                 | 0.33           | 1195      | 0.271          | 260      | 0.059          | 4414400    |
| 01/06/2019     | 2                 | 1425                 | 0.329          | 1140      | 0.263          | 285      | 0.066          | 4334510    |
| 01/06/2019     | 3                 | 1520                 | 0.326          | 1190      | 0.256          | 335      | 0.072          | 4655555    |
| 01/06/2019     | 4                 | 1430                 | 0.325          | 1120      | 0.255          | 310      | 0.07           | 4399275    |
| 01/06/2019     | 5(least deprived) | 1115                 | 0.271          | 845       | 0.205          | 265      | 0.064          | 4116645    |
| 01/07/2019     | 1(most deprived)  | 1625                 | 0.368          | 1290      | 0.292          | 340      | 0.077          | 4416270    |
| 01/07/2019     | 2                 | 1545                 | 0.356          | 1240      | 0.286          | 305      | 0.07           | 4336400    |
| 01/07/2019     | 3                 | 1595                 | 0.342          | 1290      | 0.277          | 305      | 0.065          | 4657600    |
| 01/07/2019     | 4                 | 1430                 | 0.325          | 1140      | 0.259          | 290      | 0.066          | 4400790    |
| 01/07/2019     | 5(least deprived) | 1300                 | 0.316          | 1010      | 0.245          | 290      | 0.07           | 4117830    |
| 01/08/2019     | 1(most deprived)  | 1520                 | 0.344          | 1205      | 0.272          | 315      | 0.071          | 4423065    |
| 01/08/2019     | 2                 | 1445                 | 0.333          | 1150      | 0.265          | 300      | 0.069          | 4341670    |
| 01/08/2019     | 3                 | 1585                 | 0.34           | 1240      | 0.266          | 345      | 0.074          | 4662925    |
| 01/08/2019     | 4                 | 1440                 | 0.327          | 1115      | 0.253          | 320      | 0.073          | 4405960    |
| 01/08/2019     | 5(least deprived) | 1300                 | 0.315          | 1005      | 0.244          | 295      | 0.072          | 4121995    |
| 01/09/2019     | 1(most deprived)  | 1455                 | 0.328          | 1170      | 0.264          | 285      | 0.064          | 4430425    |
| 01/09/2019     | 2                 | 1385                 | 0.319          | 1105      | 0.254          | 280      | 0.064          | 4347850    |

|            |                   |      |       |      |       |     |       |         |
|------------|-------------------|------|-------|------|-------|-----|-------|---------|
| 01/09/2019 | 3                 | 1460 | 0.313 | 1185 | 0.254 | 275 | 0.059 | 4669755 |
| 01/09/2019 | 4                 | 1360 | 0.308 | 1075 | 0.244 | 285 | 0.065 | 4412485 |
| 01/09/2019 | 5(least deprived) | 1235 | 0.299 | 980  | 0.237 | 255 | 0.062 | 4128345 |
| 01/10/2019 | 1(most deprived)  | 1515 | 0.342 | 1220 | 0.275 | 295 | 0.067 | 4431635 |
| 01/10/2019 | 2                 | 1385 | 0.318 | 1110 | 0.255 | 270 | 0.062 | 4352525 |
| 01/10/2019 | 3                 | 1480 | 0.317 | 1180 | 0.253 | 305 | 0.065 | 4670350 |
| 01/10/2019 | 4                 | 1345 | 0.305 | 1040 | 0.236 | 305 | 0.069 | 4413530 |
| 01/10/2019 | 5(least deprived) | 1180 | 0.286 | 900  | 0.218 | 280 | 0.068 | 4126135 |
| 01/11/2019 | 1(most deprived)  | 1370 | 0.309 | 1115 | 0.251 | 255 | 0.057 | 4440560 |
| 01/11/2019 | 2                 | 1390 | 0.319 | 1125 | 0.258 | 265 | 0.061 | 4362020 |
| 01/11/2019 | 3                 | 1400 | 0.299 | 1125 | 0.24  | 275 | 0.059 | 4681260 |
| 01/11/2019 | 4                 | 1305 | 0.295 | 1025 | 0.232 | 280 | 0.063 | 4421960 |
| 01/11/2019 | 5(least deprived) | 1160 | 0.281 | 920  | 0.223 | 235 | 0.057 | 4132870 |
| 01/12/2019 | 1(most deprived)  | 1455 | 0.327 | 1190 | 0.268 | 265 | 0.06  | 4445405 |
| 01/12/2019 | 2                 | 1510 | 0.346 | 1220 | 0.279 | 290 | 0.066 | 4368410 |
| 01/12/2019 | 3                 | 1595 | 0.34  | 1285 | 0.274 | 305 | 0.065 | 4686565 |
| 01/12/2019 | 4                 | 1365 | 0.308 | 1070 | 0.242 | 295 | 0.067 | 4427140 |
| 01/12/2019 | 5(least deprived) | 1150 | 0.278 | 920  | 0.222 | 230 | 0.056 | 4136235 |
| 01/01/2020 | 1(most deprived)  | 1360 | 0.306 | 1130 | 0.254 | 230 | 0.052 | 4445480 |
| 01/01/2020 | 2                 | 1360 | 0.311 | 1080 | 0.247 | 280 | 0.064 | 4368335 |
| 01/01/2020 | 3                 | 1430 | 0.305 | 1145 | 0.244 | 290 | 0.062 | 4686390 |
| 01/01/2020 | 4                 | 1365 | 0.308 | 1100 | 0.248 | 265 | 0.06  | 4427860 |
| 01/01/2020 | 5(least deprived) | 1115 | 0.27  | 880  | 0.213 | 240 | 0.058 | 4135515 |
| 01/02/2020 | 1(most deprived)  | 1170 | 0.263 | 930  | 0.209 | 235 | 0.053 | 4454015 |
| 01/02/2020 | 2                 | 1230 | 0.281 | 970  | 0.222 | 260 | 0.059 | 4377410 |
| 01/02/2020 | 3                 | 1185 | 0.252 | 950  | 0.202 | 235 | 0.05  | 4694790 |
| 01/02/2020 | 4                 | 1035 | 0.233 | 825  | 0.186 | 210 | 0.047 | 4434515 |
| 01/02/2020 | 5(least deprived) | 960  | 0.232 | 735  | 0.178 | 225 | 0.054 | 4140550 |
| 01/03/2020 | 1(most deprived)  | 800  | 0.179 | 640  | 0.144 | 155 | 0.035 | 4458125 |
| 01/03/2020 | 2                 | 765  | 0.175 | 610  | 0.139 | 155 | 0.035 | 4381935 |
| 01/03/2020 | 3                 | 830  | 0.177 | 645  | 0.137 | 185 | 0.039 | 4699120 |
| 01/03/2020 | 4                 | 810  | 0.183 | 630  | 0.142 | 175 | 0.039 | 4437775 |
| 01/03/2020 | 5(least deprived) | 625  | 0.151 | 500  | 0.121 | 125 | 0.03  | 4142225 |
| 01/04/2020 | 1(most deprived)  | 540  | 0.121 | 460  | 0.103 | 80  | 0.018 | 4465285 |
| 01/04/2020 | 2                 | 565  | 0.129 | 500  | 0.114 | 70  | 0.016 | 4389060 |
| 01/04/2020 | 3                 | 550  | 0.117 | 450  | 0.096 | 100 | 0.021 | 4704765 |
| 01/04/2020 | 4                 | 520  | 0.117 | 435  | 0.098 | 85  | 0.019 | 4442745 |
| 01/04/2020 | 5(least deprived) | 440  | 0.106 | 360  | 0.087 | 80  | 0.019 | 4146210 |
| 01/05/2020 | 1(most deprived)  | 815  | 0.182 | 685  | 0.153 | 130 | 0.029 | 4477995 |
| 01/05/2020 | 2                 | 715  | 0.162 | 600  | 0.136 | 115 | 0.026 | 4401530 |
| 01/05/2020 | 3                 | 775  | 0.164 | 645  | 0.137 | 130 | 0.028 | 4716780 |
| 01/05/2020 | 4                 | 705  | 0.158 | 595  | 0.134 | 110 | 0.025 | 4453025 |
| 01/05/2020 | 5(least deprived) | 635  | 0.153 | 520  | 0.125 | 115 | 0.028 | 4154645 |
| 01/06/2020 | 1(most deprived)  | 890  | 0.198 | 730  | 0.163 | 160 | 0.036 | 4490650 |
| 01/06/2020 | 2                 | 940  | 0.213 | 790  | 0.179 | 145 | 0.033 | 4413775 |
| 01/06/2020 | 3                 | 955  | 0.202 | 800  | 0.169 | 155 | 0.033 | 4729205 |

|            |                   |      |       |      |       |     |       |         |
|------------|-------------------|------|-------|------|-------|-----|-------|---------|
| 01/06/2020 | 4                 | 805  | 0.18  | 640  | 0.143 | 160 | 0.036 | 4463340 |
| 01/06/2020 | 5(least deprived) | 730  | 0.175 | 595  | 0.143 | 135 | 0.032 | 4163160 |
| 01/07/2020 | 1(most deprived)  | 1040 | 0.231 | 870  | 0.193 | 170 | 0.038 | 4506290 |
| 01/07/2020 | 2                 | 1040 | 0.235 | 835  | 0.189 | 205 | 0.046 | 4426450 |
| 01/07/2020 | 3                 | 1175 | 0.248 | 940  | 0.198 | 235 | 0.05  | 4740830 |
| 01/07/2020 | 4                 | 1005 | 0.225 | 785  | 0.175 | 220 | 0.049 | 4473985 |
| 01/07/2020 | 5(least deprived) | 825  | 0.198 | 660  | 0.158 | 165 | 0.04  | 4172040 |
| 01/08/2020 | 1(most deprived)  | 1135 | 0.251 | 935  | 0.207 | 200 | 0.044 | 4520120 |
| 01/08/2020 | 2                 | 1170 | 0.264 | 960  | 0.216 | 205 | 0.046 | 4439075 |
| 01/08/2020 | 3                 | 1260 | 0.265 | 1020 | 0.215 | 240 | 0.05  | 4752795 |
| 01/08/2020 | 4                 | 1135 | 0.253 | 920  | 0.205 | 215 | 0.048 | 4484735 |
| 01/08/2020 | 5(least deprived) | 940  | 0.225 | 730  | 0.175 | 210 | 0.05  | 4181465 |
| 01/09/2020 | 1(most deprived)  | 1045 | 0.231 | 860  | 0.19  | 185 | 0.041 | 4526170 |
| 01/09/2020 | 2                 | 1100 | 0.247 | 900  | 0.202 | 200 | 0.045 | 4444825 |
| 01/09/2020 | 3                 | 1090 | 0.229 | 880  | 0.185 | 210 | 0.044 | 4757860 |
| 01/09/2020 | 4                 | 990  | 0.22  | 805  | 0.179 | 185 | 0.041 | 4490400 |
| 01/09/2020 | 5(least deprived) | 895  | 0.214 | 665  | 0.159 | 230 | 0.055 | 4186700 |
| 01/10/2020 | 1(most deprived)  | 970  | 0.214 | 795  | 0.175 | 175 | 0.039 | 4536530 |
| 01/10/2020 | 2                 | 895  | 0.201 | 715  | 0.16  | 185 | 0.042 | 4456980 |
| 01/10/2020 | 3                 | 1045 | 0.219 | 835  | 0.175 | 210 | 0.044 | 4768475 |
| 01/10/2020 | 4                 | 915  | 0.203 | 710  | 0.158 | 205 | 0.046 | 4496980 |
| 01/10/2020 | 5(least deprived) | 780  | 0.186 | 620  | 0.148 | 160 | 0.038 | 4191605 |
| 01/11/2020 | 1(most deprived)  | 735  | 0.162 | 590  | 0.13  | 150 | 0.033 | 4548750 |
| 01/11/2020 | 2                 | 780  | 0.174 | 630  | 0.141 | 150 | 0.034 | 4470945 |
| 01/11/2020 | 3                 | 790  | 0.165 | 645  | 0.135 | 145 | 0.03  | 4781010 |
| 01/11/2020 | 4                 | 755  | 0.167 | 600  | 0.133 | 150 | 0.033 | 4507555 |
| 01/11/2020 | 5(least deprived) | 610  | 0.145 | 470  | 0.112 | 140 | 0.033 | 4200485 |
| 01/12/2020 | 1(most deprived)  | 705  | 0.155 | 580  | 0.127 | 130 | 0.029 | 4553855 |
| 01/12/2020 | 2                 | 710  | 0.159 | 555  | 0.124 | 150 | 0.034 | 4475285 |
| 01/12/2020 | 3                 | 775  | 0.162 | 625  | 0.131 | 150 | 0.031 | 4784395 |
| 01/12/2020 | 4                 | 720  | 0.16  | 580  | 0.129 | 140 | 0.031 | 4510095 |
| 01/12/2020 | 5(least deprived) | 560  | 0.133 | 440  | 0.105 | 120 | 0.029 | 4201745 |
| 01/01/2021 | 1(most deprived)  | 695  | 0.152 | 575  | 0.126 | 120 | 0.026 | 4559760 |
| 01/01/2021 | 2                 | 710  | 0.159 | 595  | 0.133 | 115 | 0.026 | 4478800 |
| 01/01/2021 | 3                 | 730  | 0.153 | 615  | 0.128 | 120 | 0.025 | 4786370 |
| 01/01/2021 | 4                 | 660  | 0.146 | 545  | 0.121 | 115 | 0.025 | 4510635 |
| 01/01/2021 | 5(least deprived) | 550  | 0.131 | 455  | 0.108 | 95  | 0.023 | 4201845 |
| 01/02/2021 | 1(most deprived)  | 825  | 0.181 | 685  | 0.15  | 140 | 0.031 | 4563670 |
| 01/02/2021 | 2                 | 740  | 0.165 | 605  | 0.135 | 135 | 0.03  | 4479870 |
| 01/02/2021 | 3                 | 870  | 0.182 | 710  | 0.148 | 160 | 0.033 | 4784095 |
| 01/02/2021 | 4                 | 785  | 0.174 | 635  | 0.141 | 155 | 0.034 | 4506620 |
| 01/02/2021 | 5(least deprived) | 640  | 0.153 | 510  | 0.122 | 135 | 0.032 | 4196310 |
| 01/03/2021 | 1(most deprived)  | 1050 | 0.23  | 850  | 0.186 | 200 | 0.044 | 4565725 |
| 01/03/2021 | 2                 | 985  | 0.22  | 800  | 0.179 | 185 | 0.041 | 4479245 |
| 01/03/2021 | 3                 | 1095 | 0.229 | 865  | 0.181 | 225 | 0.047 | 4780435 |
| 01/03/2021 | 4                 | 950  | 0.211 | 750  | 0.167 | 200 | 0.044 | 4502970 |

|            |                   |      |       |     |       |     |       |         |
|------------|-------------------|------|-------|-----|-------|-----|-------|---------|
| 01/03/2021 | 5(least deprived) | 795  | 0.19  | 635 | 0.151 | 160 | 0.038 | 4191510 |
| 01/04/2021 | 1(most deprived)  | 1150 | 0.252 | 945 | 0.207 | 205 | 0.045 | 4555625 |
| 01/04/2021 | 2                 | 1035 | 0.232 | 830 | 0.186 | 205 | 0.046 | 4465770 |
| 01/04/2021 | 3                 | 1095 | 0.23  | 865 | 0.182 | 230 | 0.048 | 4765615 |
| 01/04/2021 | 4                 | 990  | 0.22  | 775 | 0.173 | 215 | 0.048 | 4490420 |
| 01/04/2021 | 5(least deprived) | 865  | 0.207 | 675 | 0.161 | 190 | 0.045 | 4181850 |
| 01/05/2021 | 1(most deprived)  | 1170 | 0.258 | 955 | 0.21  | 215 | 0.047 | 4541775 |
| 01/05/2021 | 2                 | 1190 | 0.267 | 955 | 0.215 | 235 | 0.053 | 4451305 |
| 01/05/2021 | 3                 | 1155 | 0.243 | 930 | 0.196 | 225 | 0.047 | 4750140 |
| 01/05/2021 | 4                 | 1055 | 0.236 | 850 | 0.19  | 200 | 0.045 | 4476915 |
| 01/05/2021 | 5(least deprived) | 930  | 0.223 | 720 | 0.173 | 210 | 0.05  | 4170325 |
| 01/06/2021 | 1(most deprived)  | 1135 | 0.251 | 940 | 0.208 | 190 | 0.042 | 4524915 |
| 01/06/2021 | 2                 | 1145 | 0.258 | 910 | 0.205 | 235 | 0.053 | 4433555 |
| 01/06/2021 | 3                 | 1180 | 0.249 | 940 | 0.199 | 240 | 0.051 | 4732030 |
| 01/06/2021 | 4                 | 1060 | 0.238 | 820 | 0.184 | 240 | 0.054 | 4459145 |
| 01/06/2021 | 5(least deprived) | 865  | 0.208 | 675 | 0.162 | 190 | 0.046 | 4154755 |
| 01/07/2021 | 1(most deprived)  | 1150 | 0.255 | 925 | 0.205 | 225 | 0.05  | 4508825 |
| 01/07/2021 | 2                 | 1115 | 0.252 | 875 | 0.198 | 240 | 0.054 | 4416830 |
| 01/07/2021 | 3                 | 1095 | 0.232 | 890 | 0.189 | 205 | 0.043 | 4715560 |
| 01/07/2021 | 4                 | 1035 | 0.233 | 815 | 0.183 | 220 | 0.049 | 4444790 |
| 01/07/2021 | 5(least deprived) | 890  | 0.215 | 700 | 0.169 | 190 | 0.046 | 4142580 |
| 01/08/2021 | 1(most deprived)  | 995  | 0.221 | 780 | 0.173 | 215 | 0.048 | 4503720 |
| 01/08/2021 | 2                 | 1065 | 0.242 | 870 | 0.197 | 195 | 0.044 | 4409405 |
| 01/08/2021 | 3                 | 1130 | 0.24  | 895 | 0.19  | 235 | 0.05  | 4711070 |
| 01/08/2021 | 4                 | 995  | 0.224 | 780 | 0.176 | 215 | 0.048 | 4441220 |
| 01/08/2021 | 5(least deprived) | 855  | 0.207 | 675 | 0.163 | 175 | 0.042 | 4139510 |
| 01/09/2021 | 1(most deprived)  | 1055 | 0.235 | 840 | 0.187 | 215 | 0.048 | 4496075 |
| 01/09/2021 | 2                 | 990  | 0.225 | 810 | 0.184 | 180 | 0.041 | 4399840 |
| 01/09/2021 | 3                 | 1040 | 0.221 | 805 | 0.171 | 235 | 0.05  | 4703900 |
| 01/09/2021 | 4                 | 910  | 0.205 | 730 | 0.165 | 180 | 0.041 | 4435805 |
| 01/09/2021 | 5(least deprived) | 800  | 0.193 | 640 | 0.155 | 160 | 0.039 | 4135535 |
| 01/10/2021 | 1(most deprived)  | 970  | 0.216 | 830 | 0.185 | 135 | 0.03  | 4492800 |
| 01/10/2021 | 2                 | 955  | 0.217 | 790 | 0.18  | 165 | 0.038 | 4397485 |
| 01/10/2021 | 3                 | 1080 | 0.23  | 875 | 0.186 | 205 | 0.044 | 4701710 |
| 01/10/2021 | 4                 | 930  | 0.21  | 730 | 0.165 | 200 | 0.045 | 4433150 |
| 01/10/2021 | 5(least deprived) | 805  | 0.195 | 640 | 0.155 | 170 | 0.041 | 4130170 |
| 01/11/2021 | 1(most deprived)  | 945  | 0.21  | 775 | 0.173 | 165 | 0.037 | 4492060 |
| 01/11/2021 | 2                 | 920  | 0.209 | 745 | 0.169 | 175 | 0.04  | 4398120 |
| 01/11/2021 | 3                 | 990  | 0.211 | 810 | 0.172 | 180 | 0.038 | 4702975 |
| 01/11/2021 | 4                 | 945  | 0.213 | 780 | 0.176 | 165 | 0.037 | 4432875 |
| 01/11/2021 | 5(least deprived) | 725  | 0.176 | 575 | 0.139 | 150 | 0.036 | 4129350 |
| 01/12/2021 | 1(most deprived)  | 920  | 0.205 | 765 | 0.171 | 155 | 0.035 | 4483130 |
| 01/12/2021 | 2                 | 845  | 0.192 | 690 | 0.157 | 155 | 0.035 | 4396715 |
| 01/12/2021 | 3                 | 1005 | 0.214 | 825 | 0.175 | 180 | 0.038 | 4701180 |
| 01/12/2021 | 4                 | 860  | 0.194 | 690 | 0.156 | 170 | 0.038 | 4429035 |
| 01/12/2021 | 5(least deprived) | 725  | 0.176 | 585 | 0.142 | 140 | 0.034 | 4127320 |

|            |                   |     |       |     |       |     |       |         |
|------------|-------------------|-----|-------|-----|-------|-----|-------|---------|
| 01/01/2022 | 1(most deprived)  | 860 | 0.192 | 715 | 0.159 | 145 | 0.032 | 4483010 |
| 01/01/2022 | 2                 | 860 | 0.196 | 720 | 0.164 | 140 | 0.032 | 4397300 |
| 01/01/2022 | 3                 | 910 | 0.194 | 760 | 0.162 | 150 | 0.032 | 4702040 |
| 01/01/2022 | 4                 | 830 | 0.187 | 680 | 0.153 | 150 | 0.034 | 4430320 |
| 01/01/2022 | 5(least deprived) | 675 | 0.164 | 555 | 0.134 | 120 | 0.029 | 4127915 |
| 01/02/2022 | 1(most deprived)  | 805 | 0.179 | 675 | 0.151 | 125 | 0.028 | 4484865 |
| 01/02/2022 | 2                 | 765 | 0.174 | 630 | 0.143 | 130 | 0.03  | 4402690 |
| 01/02/2022 | 3                 | 815 | 0.173 | 655 | 0.139 | 160 | 0.034 | 4708190 |
| 01/02/2022 | 4                 | 790 | 0.178 | 625 | 0.141 | 165 | 0.037 | 4437200 |
| 01/02/2022 | 5(least deprived) | 655 | 0.158 | 530 | 0.128 | 130 | 0.031 | 4133115 |
| 01/03/2022 | 1(most deprived)  | 865 | 0.194 | 720 | 0.161 | 145 | 0.032 | 4463290 |
| 01/03/2022 | 2                 | 800 | 0.182 | 655 | 0.149 | 145 | 0.033 | 4403500 |
| 01/03/2022 | 3                 | 840 | 0.178 | 675 | 0.143 | 165 | 0.035 | 4711140 |
| 01/03/2022 | 4                 | 790 | 0.178 | 645 | 0.145 | 150 | 0.034 | 4442520 |
| 01/03/2022 | 5(least deprived) | 695 | 0.168 | 545 | 0.132 | 155 | 0.037 | 4139760 |
| 01/04/2022 | 1(most deprived)  | 925 | 0.207 | 770 | 0.172 | 155 | 0.035 | 4473470 |
| 01/04/2022 | 2                 | 815 | 0.184 | 655 | 0.148 | 165 | 0.037 | 4418810 |
| 01/04/2022 | 3                 | 885 | 0.187 | 730 | 0.154 | 155 | 0.033 | 4727410 |
| 01/04/2022 | 4                 | 820 | 0.184 | 635 | 0.142 | 185 | 0.041 | 4459075 |
| 01/04/2022 | 5(least deprived) | 660 | 0.159 | 525 | 0.126 | 135 | 0.033 | 4152850 |
| 01/05/2022 | 1(most deprived)  | 965 | 0.215 | 800 | 0.178 | 165 | 0.037 | 4481920 |
| 01/05/2022 | 2                 | 940 | 0.212 | 770 | 0.174 | 170 | 0.038 | 4429340 |
| 01/05/2022 | 3                 | 965 | 0.204 | 780 | 0.165 | 185 | 0.039 | 4738415 |
| 01/05/2022 | 4                 | 895 | 0.2   | 715 | 0.16  | 175 | 0.039 | 4469625 |
| 01/05/2022 | 5(least deprived) | 795 | 0.191 | 625 | 0.15  | 165 | 0.04  | 4161795 |
| 01/06/2022 | 1(most deprived)  | 920 | 0.205 | 775 | 0.173 | 150 | 0.033 | 4484315 |
| 01/06/2022 | 2                 | 865 | 0.195 | 695 | 0.157 | 170 | 0.038 | 4435285 |
| 01/06/2022 | 3                 | 925 | 0.195 | 775 | 0.163 | 155 | 0.033 | 4744825 |
| 01/06/2022 | 4                 | 845 | 0.189 | 685 | 0.153 | 165 | 0.037 | 4476915 |
| 01/06/2022 | 5(least deprived) | 710 | 0.17  | 550 | 0.132 | 160 | 0.038 | 4167785 |

To reduce the risk of secondary disclosure, all counted numbers in the baseline table were rounded to the nearest five

**eTable 15. ORs of developing non-COVID-19 sepsis for factors stratified by sepsis type (Multiple imputation)**

|                                         | <b>OR (Community + Hospital)</b> | <b>OR2 (Community)</b> | <b>OR3 (Hospital)</b> |
|-----------------------------------------|----------------------------------|------------------------|-----------------------|
| IMD                                     |                                  |                        |                       |
| IMD 1 (Most deprived)                   | 1.80 (1.77-1.83)                 | 1.90 (1.87-1.93)       | 1.44 (1.39-1.49)      |
| IMD 2                                   | 1.48 (1.46-1.50)                 | 1.54 (1.51-1.56)       | 1.27 (1.23-1.31)      |
| IMD 3                                   | 1.25 (1.23-1.27)                 | 1.28 (1.26-1.30)       | 1.14 (1.11-1.18)      |
| IMD 4                                   | 1.14 (1.12-1.16)                 | 1.15 (1.13-1.17)       | 1.10 (1.06-1.13)      |
| Ethnicity                               |                                  |                        |                       |
| Mixed                                   | 0.98 (0.92-1.04)                 | 0.97 (0.91-1.04)       | 0.99 (0.88-1.11)      |
| South Asian                             | 1.09 (1.06-1.11)                 | 1.10 (1.07-1.13)       | 1.08 (1.03-1.13)      |
| Black                                   | 0.97 (0.93-1.01)                 | 0.99 (0.94-1.03)       | 0.91 (0.84-0.99)      |
| Other                                   | 0.81 (0.77-0.85)                 | 0.80 (0.75-0.84)       | 0.85 (0.77-0.94)      |
| BMI                                     |                                  |                        |                       |
| Underweight (<18.5 kg/m <sup>2</sup> )  | 1.79 (1.75-1.83)                 | 1.68 (1.64-1.73)       | 1.69 (1.59-1.80)      |
| Overweight (25-29.9 kg/m <sup>2</sup> ) | 0.88 (0.87-0.89)                 | 0.87 (0.86-0.88)       | 0.86 (0.83-0.88)      |
| Obese I (30-34.9 kg/m <sup>2</sup> )    | 1.06 (1.05-1.08)                 | 1.06 (1.04-1.08)       | 0.94 (0.91-0.98)      |
| Obese II (35-39.9 kg/m <sup>2</sup> )   | 1.38 (1.35-1.41)                 | 1.44 (1.40-1.47)       | 1.16 (1.11-1.21)      |
| Obese III (40+ kg/m <sup>2</sup> )      | 2.23 (2.17-2.28)                 | 2.44 (2.38-2.51)       | 1.30 (1.23-1.37)      |
| Smoking                                 |                                  |                        |                       |
| Former                                  | 1.34 (1.33-1.35)                 | 1.34 (1.33-1.36)       | 1.34 (1.31-1.37)      |
| Current                                 | 1.79 (1.76-1.81)                 | 1.89 (1.86-1.93)       | 1.44 (1.39-1.48)      |

Crude ORs of sepsis by IMD quintile, ethnicity, BMI, smoking history and stratified by type of sepsis

Reference groups:

IMD quintile: the least deprived quintile (IMD 5)

Ethnicity: white

BMI: healthy range (18.5 – 24.9 kg/m<sup>2</sup>)

Smoking: never (Smoking status identified from the most recent clinical records)

Abbreviations:

IMD (Index of Multiple Deprivation) quintile measured from patient-level address

BMI, Body Mass Index (from the most recent clinical records)

**eTable 16. ORs of developing non-COVID-19 sepsis for factors stratified by sepsis type (Multiple imputation, 18+ years old study population)**

|                                         | <b>OR (Community + Hospital)</b> | <b>OR2 (Community)</b> | <b>OR3 (Hospital)</b> |
|-----------------------------------------|----------------------------------|------------------------|-----------------------|
| IMD                                     |                                  |                        |                       |
| IMD 1 (Most deprived)                   | 1.81 (1.78-1.84)                 | 1.91 (1.88-1.95)       | 1.45 (1.40-1.50)      |
| IMD 2                                   | 1.48 (1.46-1.51)                 | 1.54 (1.52-1.57)       | 1.28 (1.23-1.32)      |
| IMD 3                                   | 1.25 (1.23-1.27)                 | 1.28 (1.26-1.30)       | 1.14 (1.11-1.18)      |
| IMD 4                                   | 1.14 (1.12-1.16)                 | 1.15 (1.13-1.17)       | 1.10 (1.06-1.13)      |
| Ethnicity                               |                                  |                        |                       |
| Mixed                                   | 0.98 (0.92-1.06)                 | 0.98 (0.91-1.05)       | 1.00 (0.88-1.13)      |
| South Asian                             | 1.08 (1.05-1.10)                 | 1.09 (1.06-1.12)       | 1.06 (1.01-1.11)      |
| Black                                   | 0.97 (0.93-1.01)                 | 0.99 (0.94-1.03)       | 0.92 (0.84-1.01)      |
| Other                                   | 0.80 (0.76-0.84)                 | 0.79 (0.75-0.84)       | 0.84 (0.76-0.93)      |
| BMI                                     |                                  |                        |                       |
| Underweight (<18.5 kg/m <sup>2</sup> )  | 1.79 (1.75-1.83)                 | 1.71 (1.66-1.75)       | 1.65 (1.55-1.75)      |
| Overweight (25-29.9 kg/m <sup>2</sup> ) | 0.87 (0.86-0.88)                 | 0.84 (0.83-0.85)       | 0.85 (0.83-0.88)      |
| Obese I (30-34.9 kg/m <sup>2</sup> )    | 1.06 (1.05-1.08)                 | 1.07 (1.05-1.08)       | 0.94 (0.91-0.97)      |
| Obese II (35-39.9 kg/m <sup>2</sup> )   | 1.36 (1.33-1.39)                 | 1.43 (1.40-1.46)       | 1.15 (1.10-1.20)      |
| Obese III (40+ kg/m <sup>2</sup> )      | 2.25 (2.19-2.30)                 | 2.38 (2.32-2.44)       | 1.30 (1.23-1.38)      |
| Smoking                                 |                                  |                        |                       |
| Former                                  | 1.35 (1.34-1.36)                 | 1.35 (1.33-1.37)       | 1.35 (1.32-1.38)      |
| Current                                 | 1.80 (1.77-1.83)                 | 1.91 (1.88-1.94)       | 1.45 (1.40-1.50)      |

Crude ORs of sepsis by IMD quintile, ethnicity, BMI, smoking history and stratified by type of sepsis

Reference groups:

IMD quintile: the least deprived quintile (IMD 5)

Ethnicity: white

BMI: healthy range (18.5 – 24.9 kg/m<sup>2</sup>)

Smoking: never (Smoking status identified from the most recent clinical records)

Abbreviations:

IMD (Index of Multiple Deprivation) quintile measured from patient-level address

BMI, Body Mass Index (from the most recent clinical records)



**eTable 17. Adjusted ORs of developing non-COVID-19 sepsis for clinical characteristics stratified by sepsis type (Multiple imputation)**

| type                                   | OR (Community + Hospital) | OR2 (Community)  | OR3 (Hospital)      |
|----------------------------------------|---------------------------|------------------|---------------------|
| Potential Care Home                    | 2.34 (2.28-2.40)          | 2.32 (2.26-2.38) | 2.30 (2.11-2.50)    |
| CKD stage 3a                           | 1.24 (1.23-1.26)          | 1.24 (1.22-1.26) | 1.27 (1.22-1.33)    |
| CKD stage 3b                           | 1.70 (1.66-1.73)          | 1.68 (1.65-1.72) | 1.82 (1.72-1.92)    |
| CKD stage 4                            | 2.62 (2.55-2.70)          | 2.58 (2.51-2.66) | 3.11 (2.86-3.39)    |
| CKD stage 5                            | 6.23 (5.81-6.69)          | 5.79 (5.37-6.24) | 11.29 (9.34-13.65)  |
| RRT (dialysis)                         | 7.29 (6.79-7.83)          | 6.17 (5.70-6.68) | 18.15 (15.34-21.48) |
| RRT (transplant)                       | 5.45 (4.32-6.88)          | 4.82 (3.69-6.28) | 10.80 (6.46-18.08)  |
| With no oral steroid use               | 0.99 (0.98-1.01)          | 1.00 (0.98-1.02) | 1.00 (0.97-1.04)    |
| With oral steroid use                  | 0.92 (0.89-0.95)          | 0.93 (0.89-0.96) | 0.88 (0.81-0.95)    |
| Controlled                             | 1.45 (1.43-1.47)          | 1.47 (1.46-1.49) | 1.35 (1.30-1.39)    |
| Not controlled                         | 2.39 (2.29-2.50)          | 2.47 (2.36-2.59) | 2.07 (1.84-2.34)    |
| Without recent Hb1ac measure           | 1.58 (1.54-1.63)          | 1.62 (1.57-1.67) | 1.38 (1.28-1.49)    |
| Kidney transplant                      | 1.50 (1.21-1.85)          | 1.75 (1.37-2.23) | 0.79 (0.50-1.25)    |
| Other organ transplant                 | 1.67 (1.43-1.94)          | 1.71 (1.44-2.02) | 1.66 (1.18-2.33)    |
| Hypertension                           | 1.13 (1.11-1.14)          | 1.14 (1.13-1.16) | 1.06 (1.03-1.09)    |
| Chronic respiratory disease            | 1.44 (1.42-1.46)          | 1.45 (1.43-1.47) | 1.41 (1.36-1.47)    |
| Chronic cardiac disease                | 1.39 (1.37-1.41)          | 1.37 (1.35-1.39) | 1.56 (1.51-1.61)    |
| Cancer (non haematological)            | 2.37 (2.34-2.40)          | 1.74 (1.71-1.76) | 7.94 (7.71-8.17)    |
| Haematological malignancy              | 2.53 (2.43-2.63)          | 1.80 (1.72-1.89) | 4.72 (4.32-5.15)    |
| Chronic liver disease                  | 3.08 (2.97-3.19)          | 3.08 (2.96-3.20) | 3.43 (3.13-3.76)    |
| Stroke                                 | 1.48 (1.45-1.50)          | 1.48 (1.46-1.51) | 1.43 (1.37-1.51)    |
| Dementia                               | 1.42 (1.37-1.47)          | 1.44 (1.39-1.49) | 1.11 (0.98-1.25)    |
| Other neurological disease             | 2.33 (2.28-2.39)          | 2.43 (2.37-2.50) | 1.92 (1.78-2.07)    |
| Asplenia                               | 1.13 (1.05-1.21)          | 1.13 (1.04-1.23) | 1.31 (1.10-1.55)    |
| Rheumatoid arthritis/ lupus/ psoriasis | 1.25 (1.23-1.27)          | 1.26 (1.23-1.28) | 1.23 (1.17-1.28)    |
| Immunosuppressive condition            | 2.09 (2.02-2.16)          | 1.64 (1.58-1.70) | 5.15 (4.79-5.54)    |
| Learning disability                    | 3.53 (3.35-3.73)          | 3.90 (3.68-4.14) | 2.45 (2.12-2.83)    |
| Severe mental illness                  | 1.96 (1.89-2.03)          | 2.06 (1.99-2.14) | 1.52 (1.38-1.67)    |
| Alcohol problems                       | 1.37 (1.35-1.39)          | 1.41 (1.38-1.43) | 1.25 (1.20-1.30)    |
| Antibiotic count: 1                    | 1.73 (1.70-1.75)          | 1.69 (1.67-1.72) | 1.86 (1.80-1.93)    |
| Antibiotic count: 2-3                  | 2.30 (2.27-2.34)          | 2.28 (2.24-2.32) | 2.41 (2.32-2.50)    |
| Antibiotic count: 3+                   | 3.38 (3.33-3.43)          | 3.39 (3.33-3.45) | 3.41 (3.37-3.55)    |

Reference groups:

Clinical characteristics: the patients without the clinical disease.

The number of prior antibiotic prescriptions: antibiotic count: 0.

Models were adjusted for all comorbidities\*

All comorbidities\* (Hypertension, chronic cardiac disease, diabetes, stroke, chronic kidney disease or renal replacement therapy) and asthma, cancer (non-haematological and haematological), chronic liver disease, dementia, other neurological disease (including motor neuron disease, myasthenia gravis, multiple sclerosis, Parkinson's disease, cerebral palsy, quadriplegia or hemiplegia, and progressive cerebellar disease), organ kidney transplant, asplenia (due to splenectomy or spleen dysfunction, including sickle cell disease), rheumatoid arthritis/lupus/psoriasis, other immunosuppressive conditions, learning disability, severe mental ill, the number of prior antibiotic prescription from one year and six week to six week before the index time (indicating the infection history)

Abbreviations:

CKD, chronic kidney disease; RRT, renal replacement therapy.

The number of prior antibiotic prescriptions (one year plus six weeks to six weeks before the index date)

**eTable 18. Adjusted ORs of developing non-COVID-19 sepsis for clinical characteristics stratified by sepsis type (Multiple imputation, 18+ years old study population)**

| type                                   | OR (Community + Hospital) | OR2 (Community)  | OR3 (Hospital)      |
|----------------------------------------|---------------------------|------------------|---------------------|
| Potential Care Home                    | 2.34 (2.28-2.40)          | 2.32 (2.26-2.38) | 2.30 (2.11-2.50)    |
| CKD stage 3a                           | 1.24 (1.23-1.26)          | 1.24 (1.22-1.26) | 1.27 (1.22-1.33)    |
| CKD stage 3b                           | 1.70 (1.67-1.73)          | 1.68 (1.65-1.72) | 1.82 (1.72-1.92)    |
| CKD stage 4                            | 2.62 (2.55-2.70)          | 2.58 (2.51-2.66) | 3.10 (2.85-3.38)    |
| CKD stage 5                            | 6.23 (5.81-6.68)          | 5.79 (5.37-6.24) | 11.15 (9.23-13.47)  |
| RRT (dialysis)                         | 7.22 (6.73-7.75)          | 6.13 (5.66-6.64) | 17.71 (14.97-20.94) |
| RRT (transplant)                       | 5.39 (4.27-6.80)          | 4.80 (3.68-6.25) | 10.29 (6.15-17.21)  |
| With no oral steroid use               | 0.99 (0.98-1.01)          | 1.00 (0.98-1.01) | 1.00 (0.96-1.04)    |
| With oral steroid use                  | 0.91 (0.89-0.94)          | 0.92 (0.89-0.96) | 0.88 (0.81-0.95)    |
| Controlled                             | 1.45 (1.43-1.47)          | 1.47 (1.45-1.49) | 1.35 (1.30-1.39)    |
| Not controlled                         | 2.39 (2.28-2.49)          | 2.47 (2.36-2.59) | 2.07 (1.84-2.33)    |
| Without recent Hb1ac measure           | 1.58 (1.53-1.62)          | 1.61 (1.56-1.66) | 1.38 (1.28-1.49)    |
| Kidney transplant                      | 1.49 (1.21-1.85)          | 1.74 (1.37-2.22) | 0.79 (0.50-1.25)    |
| Other organ transplant                 | 1.55 (1.33-1.81)          | 1.62 (1.36-1.92) | 1.44 (1.02-2.04)    |
| Hypertension                           | 1.12 (1.11-1.14)          | 1.14 (1.13-1.16) | 1.06 (1.02-1.09)    |
| Chronic respiratory disease            | 1.44 (1.41-1.46)          | 1.45 (1.43-1.47) | 1.41 (1.36-1.47)    |
| Chronic cardiac disease                | 1.38 (1.37-1.40)          | 1.37 (1.35-1.38) | 1.55 (1.50-1.60)    |
| Cancer (non haematological)            | 2.35 (2.32-2.38)          | 1.73 (1.71-1.76) | 7.73 (7.51-7.96)    |
| Haematological malignancy              | 2.47 (2.37-2.57)          | 1.79 (1.70-1.88) | 4.58 (4.19-5.00)    |
| Chronic liver disease                  | 3.06 (2.95-3.17)          | 3.07 (2.95-3.19) | 3.38 (3.08-3.71)    |
| Stroke                                 | 1.47 (1.45-1.50)          | 1.48 (1.46-1.51) | 1.43 (1.36-1.50)    |
| Dementia                               | 1.41 (1.36-1.47)          | 1.44 (1.39-1.49) | 1.10 (0.97-1.25)    |
| Other neurological disease             | 2.30 (2.24-2.36)          | 2.41 (2.35-2.48) | 1.86 (1.72-2.01)    |
| Asplenia                               | 1.11 (1.03-1.19)          | 1.12 (1.03-1.21) | 1.27 (1.07-1.51)    |
| Rheumatoid arthritis/ lupus/ psoriasis | 1.25 (1.23-1.27)          | 1.26 (1.24-1.28) | 1.22 (1.17-1.28)    |
| Immunosuppressive condition            | 2.05 (1.98-2.12)          | 1.61 (1.55-1.67) | 5.01 (4.66-5.39)    |
| Learning disability                    | 3.39 (3.21-3.58)          | 3.76 (3.54-3.99) | 2.25 (1.93-2.61)    |
| Severe mental illness                  | 1.96 (1.89-2.03)          | 2.06 (1.99-2.14) | 1.52 (1.39-1.67)    |
| Alcohol problems                       | 1.37 (1.35-1.39)          | 1.41 (1.38-1.43) | 1.25 (1.20-1.30)    |
| Antibiotic count: 1                    | 1.73 (1.71-1.76)          | 1.70 (1.68-1.73) | 1.86 (1.80-1.93)    |
| Antibiotic count: 2-3                  | 2.31 (2.27-2.34)          | 2.28 (2.25-2.32) | 2.40 (2.31-2.49)    |
| Antibiotic count: 3+                   | 3.36 (3.31-3.42)          | 3.38 (3.32-3.44) | 3.35 (3.21-3.50)    |

Reference groups:

Clinical characteristics: the patients without the clinical disease.

The number of prior antibiotic prescriptions: antibiotic count: 0.

Models were adjusted for all comorbidities\*

All comorbidities\* (Hypertension, chronic cardiac disease, diabetes, stroke, chronic kidney disease or renal replacement therapy) and asthma, cancer (non-haematological and haematological), chronic liver disease, dementia, other neurological disease (including motor neuron disease, myasthenia gravis, multiple sclerosis, Parkinson's disease, cerebral palsy, quadriplegia or hemiplegia, and progressive cerebellar disease), organ kidney transplant, asplenia (due to splenectomy or spleen dysfunction, including sickle cell disease), rheumatoid arthritis/lupus/psoriasis, other immunosuppressive conditions, learning disability, severe mental illness, the number of prior antibiotic prescription from one year and six weeks to six weeks before the index time (indicating the infection history)

Abbreviations:

CKD, chronic kidney disease; RRT, renal replacement therapy.

The number of prior antibiotic prescriptions (one year plus six weeks to six weeks before the index date)

**eTable 19. Adjusted ORs of community-acquired sepsis 30-day mortality stratified by COVID-19 period (Multiple imputation)**

| Group            | Category                                | OR (Community + Hospital) | OR2 (Community) | OR3 (Hospital)   |
|------------------|-----------------------------------------|---------------------------|-----------------|------------------|
| Age              | 18-39                                   | 0.18(0.15,0.22)           | 0.19(0.15,0.23) | 0.17(0.14,0.20)  |
| Age              | 40-49                                   | 0.59(0.51,0.68)           | 0.70(0.59,0.81) | 0.71(0.62,0.82)  |
| Age              | 60-69                                   | 1.36(1.24,1.48)           | 1.23(1.10,1.37) | 1.21(1.10,1.33)  |
| Age              | 70-79                                   | 1.80(1.66,1.95)           | 1.52(1.37,1.68) | 1.59(1.46,1.72)  |
| Age              | 80+                                     | 3.01(2.79,3.25)           | 2.44(2.22,2.69) | 2.53(2.34,2.74)  |
| Age              | <18                                     | 0.15(0.11,0.22)           | 0.10(0.05,0.16) | 0.09(0.05,0.13)  |
| Antibiotic count | Antibiotic count: 1                     | 0.96(0.91,1.03)           | 0.95(0.89,1.02) | 0.98(0.93,1.04)  |
| Antibiotic count | Antibiotic count: 2-3                   | 1.00(0.95,1.05)           | 1.07(1.00,1.14) | 1.02(0.97,1.08)  |
| Antibiotic count | Antibiotic count: 3+                    | 1.01(0.97,1.06)           | 1.05(0.98,1.12) | 1.05(0.99,1.10)  |
| Asthma           | With no oral steroid use                | 0.85(0.80,0.90)           | 0.88(0.81,0.95) | 0.87(0.82,0.92)  |
| Asthma           | With oral steroid use                   | 0.86(0.79,0.97)           | 1.09(0.94,1.25) | 0.97(0.86,1.09)  |
| BMI              | Obese I (30-34.9 kg/m <sup>2</sup> )    | 0.83(0.78,0.88)           | 0.83(0.75,0.91) | 0.83(0.77,0.90)  |
| BMI              | Obese II (35-39.9 kg/m <sup>2</sup> )   | 0.84(0.70,1.00)           | 0.81(0.72,0.90) | 0.89(0.81,0.97)  |
| BMI              | Obese III (40+ kg/m <sup>2</sup> )      | 0.91(0.82,1.00)           | 1.04(0.92,1.17) | 0.99(0.90,1.09)  |
| BMI              | Overweight (25-29.9 kg/m <sup>2</sup> ) | 0.90(0.81,0.99)           | 0.89(0.82,0.98) | 0.83(0.76,0.91)  |
| BMI              | Underweight (<18.5 kg/m <sup>2</sup> )  | 1.10(1.02,1.19)           | 1.12(1.00,1.25) | 1.16(1.06,1.27)  |
| CKD/RRT          | CKD stage 3a                            | 0.95(0.91,1.00)           | 1.02(0.95,1.09) | 0.90(0.86,0.96)  |
| CKD/RRT          | CKD stage 3b                            | 1.13(1.07,1.19)           | 1.25(1.16,1.35) | 1.12(1.06,1.19)  |
| CKD/RRT          | CKD stage 4                             | 1.54(1.43,1.65)           | 1.59(1.44,1.75) | 1.41(1.30,1.53)  |
| CKD/RRT          | CKD stage 5                             | 1.67(1.42,1.96)           | 1.79(1.44,2.22) | 1.37(1.15,1.63)  |
| CKD/RRT          | RRT (dialysis)                          | 1.24(1.05,1.46)           | 1.02(0.80,1.30) | 0.82(0.65,1.01)  |
| CKD/RRT          | RRT (transplant)                        | 0.54(0.39,0.73)           | 0.58(0.37,0.86) | 0.65(0.46,0.89)  |
| Diabetes         | Controlled                              | 0.93(0.90,0.97)           | 0.93(0.88,0.98) | 0.93(0.89,0.98)  |
| Diabetes         | Not controlled                          | 0.86(0.75,0.98)           | 0.84(0.69,1.02) | 0.81(0.69,0.94)  |
| Diabetes         | Without recent Hb1ac measure            | 0.99(0.89,1.1)            | 0.99(0.88,1.12) | 1.04(0.953,1.14) |
| Ethnicity        | Black                                   | 0.73(0.60,0.89)           | 0.89(0.69,1.13) | 0.64(0.51,0.79)  |
| Ethnicity        | Mixed                                   | 0.61(0.43,0.84)           | 1.05(0.71,1.52) | 0.73(0.53,1.00)  |
| Ethnicity        | Other                                   | 0.88(0.70,1.09)           | 1.11(0.83,1.47) | 1.06(0.83,1.34)  |
| Ethnicity        | South Asian                             | 0.81(0.73,0.90)           | 0.94(0.80,1.09) | 0.86(0.77,0.96)  |
| IMD              | IMD1(most deprived)                     | 1.25(1.18,1.32)           | 1.21(1.12,1.32) | 1.21(1.14,1.29)  |
| IMD              | IMD2                                    | 1.21(1.14,1.29)           | 1.16(1.07,1.25) | 1.08(1.01,1.15)  |
| IMD              | IMD3                                    | 1.09(1.03,1.16)           | 1.06(0.98,1.15) | 1.04(0.98,1.11)  |
| IMD              | IMD4                                    | 1.06(1.00,1.13)           | 1.03(0.95,1.12) | 1.02(0.96,1.09)  |
| Others           | Alcohol problems                        | 1.35(1.27,1.43)           | 1.46(1.35,1.57) | 1.35(1.27,1.43)  |
| Others           | Asplenia                                | 1.36(1.08,1.70)           | 1.27(0.94,1.70) | 0.83(0.62,1.08)  |
| Others           | Cancer (non haematological)             | 1.29(1.24,1.35)           | 1.26(1.2,1.34)  | 1.26(1.20,1.31)  |
| Others           | Chronic cardiac disease                 | 1.13(1.09,1.18)           | 1.14(1.08,1.20) | 1.14(1.09,1.18)  |
| Others           | Chronic liver disease                   | 1.84(1.67,2.02)           | 2.05(1.81,2.32) | 2.04(1.84,2.25)  |
| Others           | Chronic respiratory disease             | 1.19(1.14,1.24)           | 1.29(1.21,1.37) | 1.33(1.27,1.40)  |
| Others           | Dementia                                | 1.08(0.99,1.18)           | 1.14(1.00,1.31) | 1.15(1.03,1.29)  |
| Others           | Haematological malignancy               | 0.97(0.88,1.06)           | 0.94(0.83,1.06) | 0.88(0.80,0.98)  |

|         |                                        |                 |                 |                 |
|---------|----------------------------------------|-----------------|-----------------|-----------------|
| Others  | Hypertension                           | 0.97(0.93,1.01) | 0.98(0.93,1.04) | 0.94(0.90,0.98) |
| Others  | Immunosuppressive condition            | 1.03(0.96,1.11) | 0.99(0.90,1.10) | 0.98(0.90,1.06) |
| Others  | Learning disability                    | 1.38(1.17,1.61) | 1.35(1.07,1.68) | 0.98(0.80,1.18) |
| Others  | Other neurological disease             | 0.99(0.92,1.07) | 1.00(0.90,1.11) | 1.01(0.93,1.11) |
| Others  | Potential Care Home                    | 0.80(0.76,0.85) | 1.21(1.08,1.36) | 1.28(1.15,1.41) |
| Others  | Rheumatoid arthritis/ lupus/ psoriasis | 1.00(0.94,1.06) | 1.02(0.94,1.11) | 1.04(0.98,1.11) |
| Others  | Severe mental illness                  | 0.90(0.81,1.01) | 1.00(0.85,1.17) | 0.92(0.81,1.04) |
| Others  | Stroke                                 | 1.03(0.96,1.10) | 0.99(0.91,1.08) | 0.96(0.91,1.02) |
| Region  | East Midlands                          | 0.95(0.91,1.01) | 1.14(1.06,1.22) | 1.00(0.94,1.05) |
| Region  | London                                 | 0.80(0.72,0.88) | 0.98(0.86,1.11) | 0.84(0.76,0.94) |
| Region  | North East                             | 1.04(0.95,1.14) | 1.15(1.01,1.30) | 1.06(0.96,1.17) |
| Region  | North West                             | 1.18(1.10,1.26) | 1.27(1.16,1.39) | 1.09(1.01,1.17) |
| Region  | South East                             | 0.76(0.70,0.82) | 0.86(0.78,0.96) | 0.79(0.72,0.86) |
| Region  | South West                             | 0.98(0.92,1.05) | 1.04(0.95,1.13) | 0.96(0.90,1.03) |
| Region  | West Midlands                          | 1.10(0.99,1.21) | 1.37(1.19,1.57) | 1.15(1.04,1.26) |
| Region  | Yorkshire and the Humber               | 1.08(1.02,1.15) | 1.23(1.13,1.33) | 1.17(1.10,1.25) |
| Sex     | Male                                   | 0.97(0.94,1.01) | 0.97(0.92,1.02) | 0.96(0.92,1.00) |
| Smoking | Current                                | 1.58(1.49,1.68) | 1.61(1.49,1.75) | 1.68(1.57,1.79) |
| Smoking | Former                                 | 1.07(1.03,1.11) | 1.1(1.04,1.16)  | 1.15(1.10,1.20) |
| Tx      | Kidney transplant                      | 0.62(0.47,0.79) | 0.54(0.37,0.77) | 0.59(0.43,0.79) |
| Tx      | Other organ transplant                 | 0.95(0.61,1.43) | 0.46(0.19,0.95) | 0.84(0.49,1.37) |

Models were adjusted for age using a 4-knot cubic spline, except for estimation of age group relative odds of 30-day mortality; and adjusted for sex, except for estimation of sex group relative odds of 30-day mortality; and stratified by region, except for IMD group relative odds of 30-day mortality.

Abbreviations: IMD, index of multiple deprivation; BMI, body mass index;

Tx, transplant; CKD, chronic kidney disease; RRT, renal replacement therapy.

The number of prior antibiotic prescriptions (one year plus six weeks to six weeks before the index date)

Reference sub-group:

age: 50-59 years

sex: female

region: East of England

IMD: the least deprived quintile

ethnicity: white

BMI: healthy range (18.5 – 24.9 kg/m<sup>2</sup>)

smoking: never

prior antibiotic count: 0

Patients without the disease were used as the reference for other clinical conditions.

## **eText 1. The selection criteria for potential controls**

Every six months, we selected and extracted potential controls. We extracted patients who did not have a diagnosis of sepsis from 15 days prior to the start date up to 15 days after the end date. (The start date and end date were the cut-off dates for each six-month period.)

## **eText 2. The definition of Index of Multiple Deprivation (IMD) quintile**

This variable was determined by accessing the patient's address at the individual level and calculating their ranking relative to the 32,800 Lower Layer Super Output Areas[1]. IMD score incorporates information on various indicators such as income, employment, crime rate, living environment, education, and barriers to services.

## **eText 3. The definition of predictors**

### **The first set of predictors:**

Region, ethnicity (white, mixed, Asian, black, other, unknown), and body mass index (BMI) were all considered in the analysis. To minimize the loss of information resulting from categorizing a continuous variable and missing data, BMI was classified into six groups (plus one group for missing data) based on the NICE definition: underweight (<18.5 kg/m<sup>2</sup>), healthy range (18.5-24.9 kg/m<sup>2</sup>), overweight (25-29.9 kg/m<sup>2</sup>), obese I (30-34.9 kg/m<sup>2</sup>), II (35-39.9 kg/m<sup>2</sup>), III (≥40kg/m<sup>2</sup>)[2,3]. Additionally, smoking status (never, former, current), alcohol problems, and care home status (TPP have matched patient addresses to care homes in the CQC database[4]) were also measured.

### **The second set of predictors:**

The following comorbidities were included: high blood pressure or diagnosed hypertension, chronic respiratory diseases (excluding asthma), asthma (classified based on with or without recent use of oral steroids), chronic heart disease, diabetes (classified based on the most recent HbA1c measurement within the 15 months before the index date), cancer (non-haematological and haematological), chronic kidney disease (CKD) or renal replacement therapy (RRT) (classified based on estimated glomerular filtration rates of ≥60 [absent], <60 and ≥45 [stage 3a], <45 and ≥30 [stage 3b], <30 and ≥15 [stage 4], and <15 [stage 5], respectively, or diagnostic codes indicative of dialysis and kidney transplant), chronic liver disease, stroke, dementia, other neurological disease (including motor neuron disease, myasthenia gravis, multiple sclerosis, Parkinson's disease, cerebral palsy, quadriplegia or hemiplegia, and progressive cerebellar disease), organ transplant (kidney or other), asplenia (due to splenectomy or spleen dysfunction, including sickle cell disease), rheumatoid arthritis/lupus/psoriasis, learning disabilities, severe mental illness, and other immunosuppressive conditions.[5]

The antibiotics included in this were systemic antibiotics for common infections listed in chapter 5.1 (antibacterial drugs) of the British National Formulary (BNF), except for BNF 5.1.9 (antituberculosis drugs) and BNF 5.1.10 (antileprotic drugs). A total of 55 unique antibiotics (based on molecular structure) was prescribed to the study population, referred to as "antibiotic types" to indicate the diversity of antibiotics used. Any antibiotic issued within six weeks before the index date was excluded from the study as they may have been potentially related to treating developing sepsis. The antibiotic exposure was evaluated by total count of antibiotics in the one year before (from one year and six weeks to six weeks before the index date).

## **eText 4. Missing data**

There were missing data for body mass index (BMI), smoking history and ethnicity, which were treated as a separate category in the regression analyses. There was no missing data in comorbidities as they were coded as present or absent.

There were missing data for BMI in 18.5% (N=291,270) in the overall study population of cases and controls, for smoking, 3.0% (N= 47,335) and for ethnicity 5.5 % (N 88,055). With respect to BMI, 28,144 cases and controls had missing BMI as they were patients aged ≤ 15 years. This occurred because the earliest data extraction for BMI started from 16 years old. In patients aged 16 years or older, the missing data represented 16.8% (N=263,126) of cases and controls for BMI. Regarding smoking, 29,088 of the missing values were from patients aged < 18 years old (with smoking history only infrequently assessed in children in primary care). In patients aged 18 years or older, the missing data represented 1.2% (N=19,375) of cases and controls for smoking history. When examining the missing percentages between cases and controls, we observed that controls typically had more missing records compared to cases. Regarding ethnicity, 2,623 cases and controls had missing ethnicity in patients aged <18 years old. In patients aged 18 years or older, the missing data represent 5.4 % (N = 84,433) of cases and controls for missing ethnicity. These results indicating non-random missingness is not unexpected as typically some risk factor information is only being collected for patients who consult their GP for e.g. health

complaints. The exception is the NHS Health check program which aims to be a population screening of risk factor information involving a check-up in primary care for adults in England aged 40 to 74. It can help spot early signs of stroke, kidney disease, heart disease, type 2 diabetes or dementia[6]. However, a recent study reported that the uptake in health checks is differential, even after adjustment for patient and practice level.[7] For these reasons, it was concluded that data for BMI, ethnicity and smoking history was not missing at random (MNAR) in the study population.

### **eText 5. Model adjustments for IMD**

Sequentially, four models were implemented. The first was an unadjusted model with IMD as the sole predictor (called Unadjusted). In Model 1, the specific COVID-19 time periods were assumed to be a moderator variable and included in model 1 for the analysis of potential heterogeneity of the IMD effects over time due to pandemic. Given the emergent understanding of shared molecular regulatory pathways between sepsis and cardiometabolic conditions—and noting that individuals with such conditions are predisposed to severe manifestations of both COVID-19 and sepsis—Model 2 made adjustments for demographic information from our primary set of predictors (detailed in eText 3) and cardiometabolic comorbidities.[8,9] Lastly, Model 3 accounted for all comorbidities from our secondary set of predictors (refer to eText 3) and also considered the frequency of prior antibiotic prescriptions (spanning the period from one year and six weeks prior to the index date up until six weeks before this date). By following this approach, We aimed to assess whether the association between IMD and the development of non-COVID-19 sepsis remains significant when adjusting for various variables.

### **eText 6. Comparing the different approaches to dealing with missing data**

When using the missing indicator method, the results were as follows: Higher odds of developing non-COVID-19 sepsis were notably associated with the most deprived quintiles (Figure 3) in the all-age population. The crude ORs [95% Confidence Intervals (CI)] were as follows: For IMD1 (most deprived), it was 1.80 [1.77-1.83]; IMD2, 1.48 [1.46-1.51]; IMD3, 1.25 [1.23-1.27]; and IMD4, 1.14 [1.12-1.16]. In the 18+ population, the crude ORs were consistent: 1.81 [1.78-1.84] for IMD1, 1.48 [1.46-1.50] for IMD2, 1.25 [1.23-1.27] for IMD3, and 1.14 [1.12-1.16] for IMD4 (eFigure 6).

Upon the application of multiple imputations, in the all-age cohort, the crude ORs were consistent: 1.80 [1.77-1.83] for IMD1, 1.48 [1.46-1.50] for IMD2, 1.25 [1.23-1.27] for IMD3, and 1.14 [1.12-1.16] for IMD4 (eTable 15). Similarly, in the 18+ age category, the crude ORs after multiple imputations were 1.81 [1.78-1.84] for IMD1, 1.48 [1.46-1.51] for IMD2, 1.25 [1.23-1.27] for IMD3, and 1.14 [1.12-1.16] for IMD4 (eTable 16).

In the competing risk analysis: 1.79 [1.76-1.82] for IMD1, 1.48 [1.45-1.50] for IMD2, 1.24 [1.22-1.26] for IMD3, and 1.14 [1.12-1.16] for IMD4 (eTable 11).”

We also addressed the additional sensitivity result in the result section: “We found the result matched properly in the sensitivity analysis for 18+ study population (eFigure 6-9). The complete case analysis (eTable 9-12) and the analysis using multiple imputation (eTable 15-19) also presented a consistent result (see further statement in eText 6).

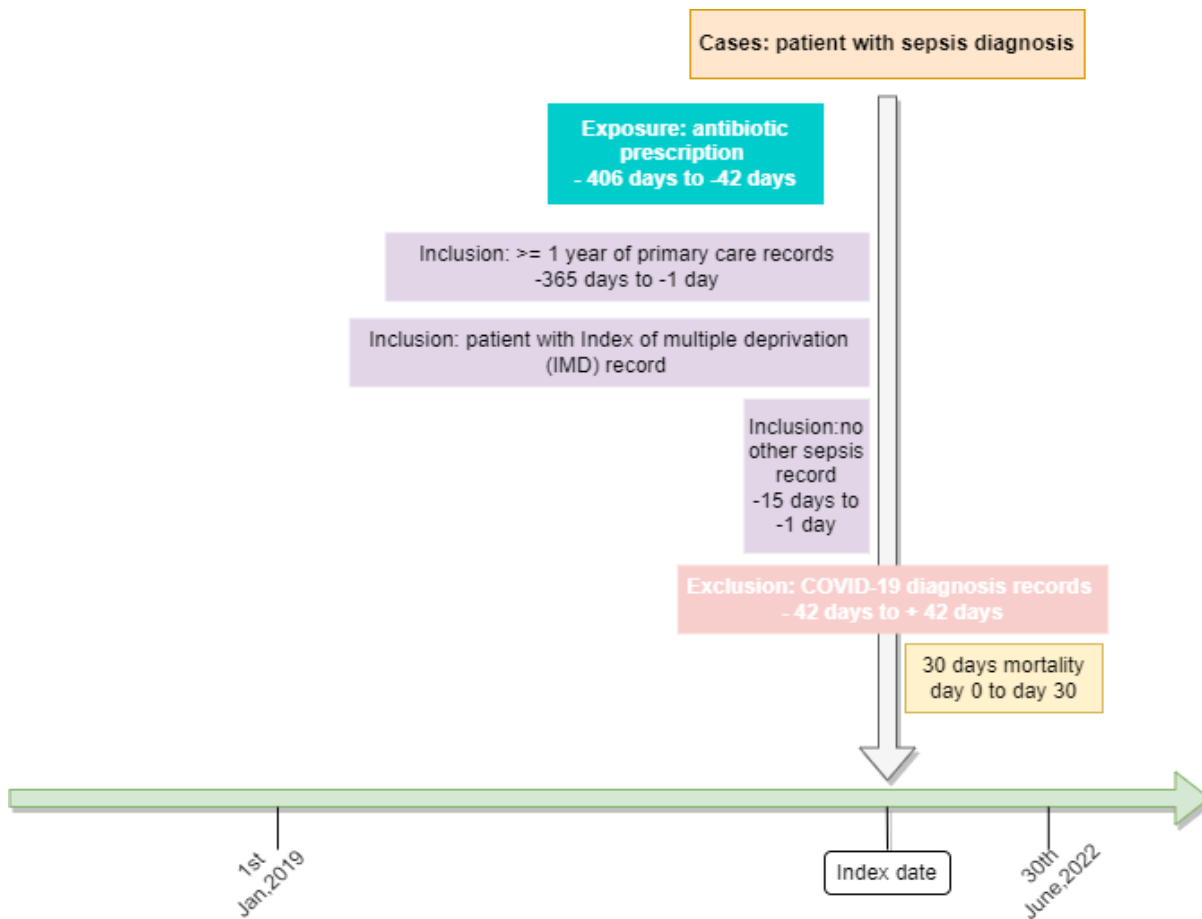

**eFigure 1. Diagram of patient selection (index date) and prior antibiotic measurements**

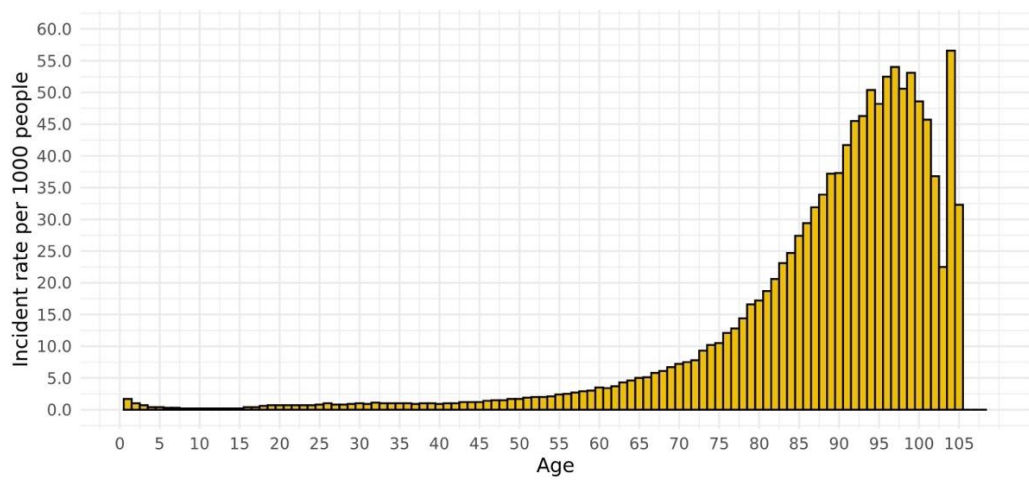

A

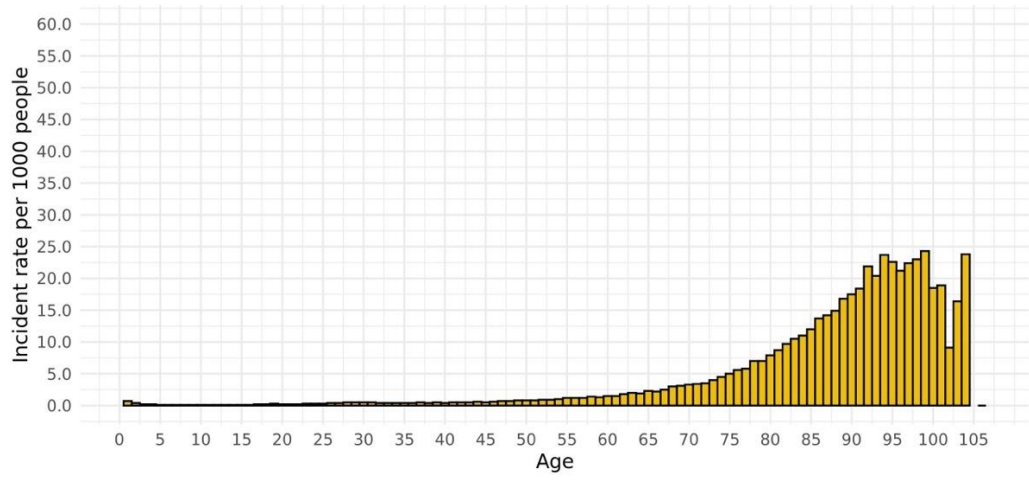

B

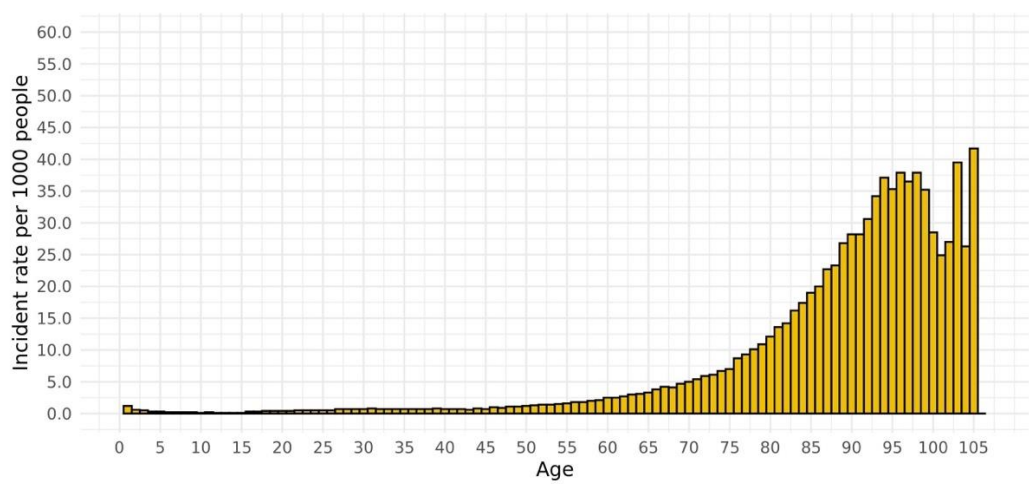

C

**eFigure 2. Age-specific incidence rate of community-acquired sepsis**

To reduce the risk of secondary disclosure, all counted numbers in the graph were rounded to the nearest five, the incident rate was calculated after rounded

The incidence rate of sepsis was calculated as the number of cases per 1000 registered persons

(A. Period 1: 2019-01-01 to 2020-03-25; B. Period 2: 2020-03-26 to 2021-03-08; C. Period 3: 2021-03-09 to 2022-06-30)



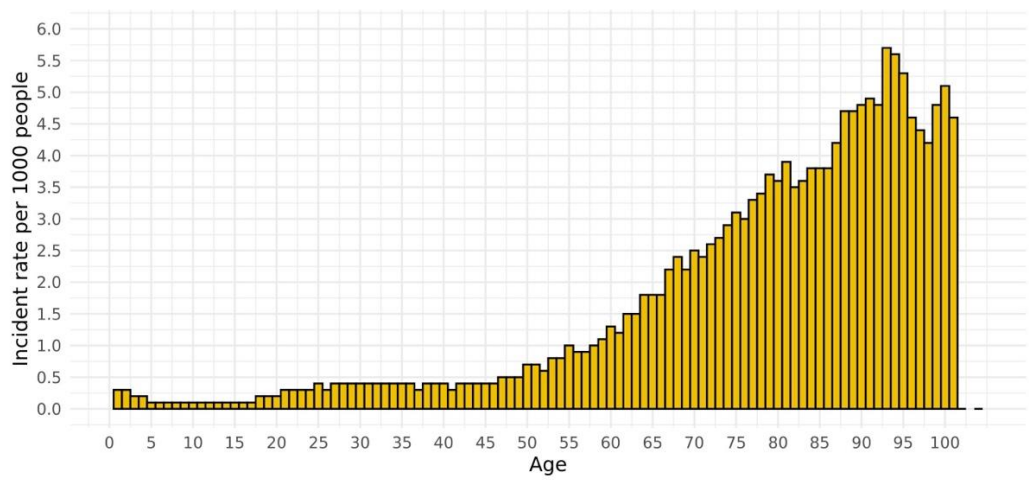

A

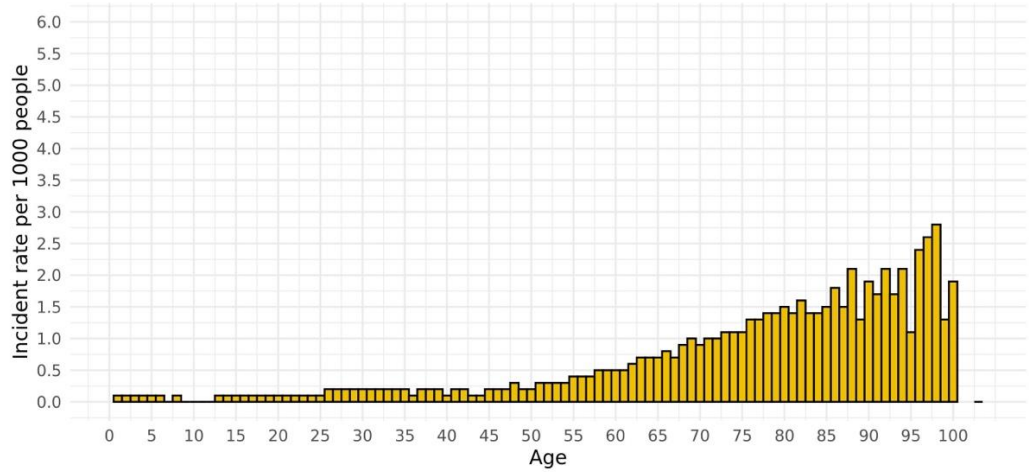

B

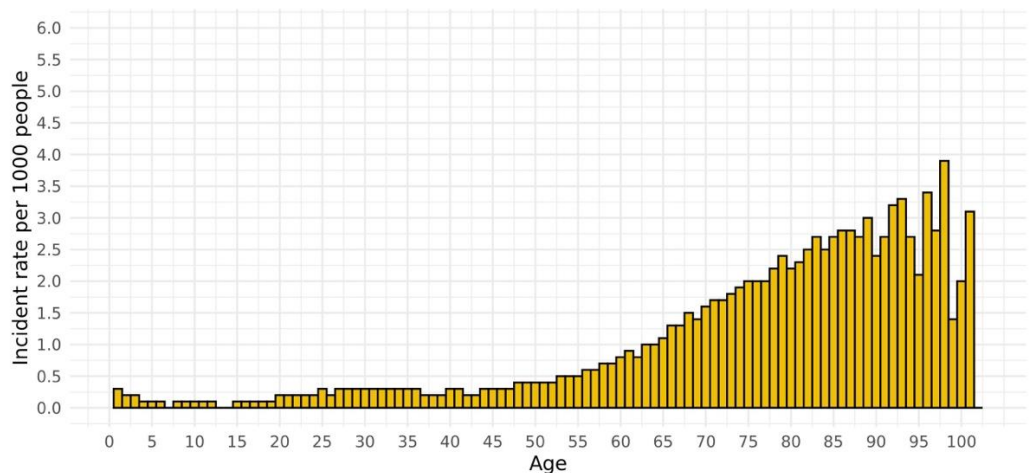

C

**eFigure 3. Age-specific incidence rate of hospital-acquired sepsis**

To reduce the risk of secondary disclosure, all counted numbers in the graph were rounded to the nearest five, the incident rate was calculated after rounded

The incidence rate of sepsis was calculated as the number of cases per 1000 registered persons

(A. Period 1: 2019-01-01 to 2020-03-25; B. Period 2: 2020-03-26 to 2021-03-08; C. Period 3: 2021-03-09 to 2022-06-30)

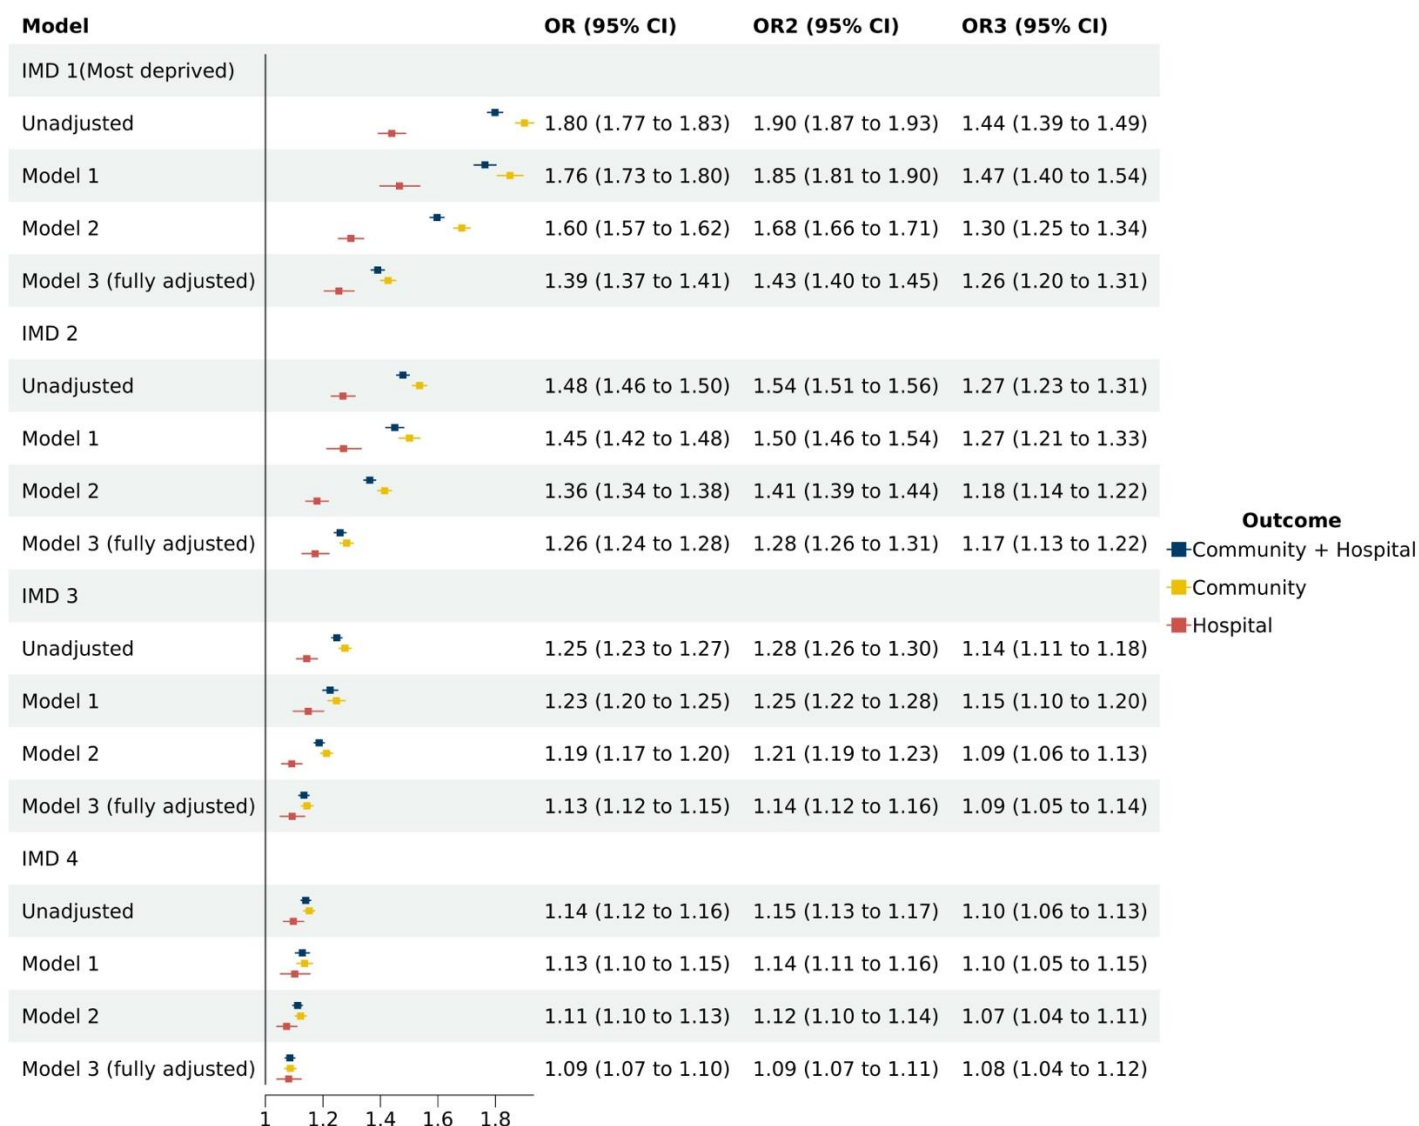

**eFigure 4. Association between index of multiple deprivations (IMD) quintile and risk of hospital admission for Sepsis**

OR: Community + Hospital, OR2: Community, OR3: Hospital

IMD (Index of Multiple Deprivation) quintile measured from patient-level address.

Odds ratios are compared to the least deprived quintile (IMD 5)

Model 1 – adjusted for interaction term between IMD and time (Period 1: 2019-01-01 to 2020-03-25; Period 2: 2020-03-26 to 2021-03-08; Period 3: 2021-03-09 to 2022-06-30)

Model 2 – adjusted for cardiometabolic comorbidities\*

Model 3 (fully adjusted model) – adjust for all comorbidities\*\*

Cardiometabolic comorbidities\* Hypertension, chronic cardiac disease, diabetes, stroke, chronic kidney disease or renal replacement therapy)

All comorbidities\*\* Cardiometabolic comorbidities and asthma, cancer (non-haematological and haematological), chronic liver disease, dementia, other neurological disease (including motor neuron disease, myasthenia gravis, multiple sclerosis, Parkinson's disease, cerebral palsy, quadriplegia or hemiplegia, and progressive cerebellar disease), organ kidney transplant, asplenia (due to splenectomy or spleen dysfunction, including sickle cell disease), rheumatoid arthritis/lupus/psoriasis, other immunosuppressive conditions, learning disability, several mental ill, the number of prior antibiotic prescription from one year and six week to six week before the index time (indicating the infection history)

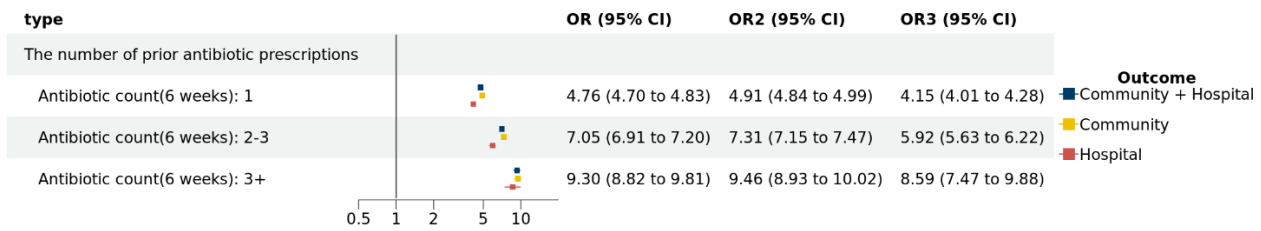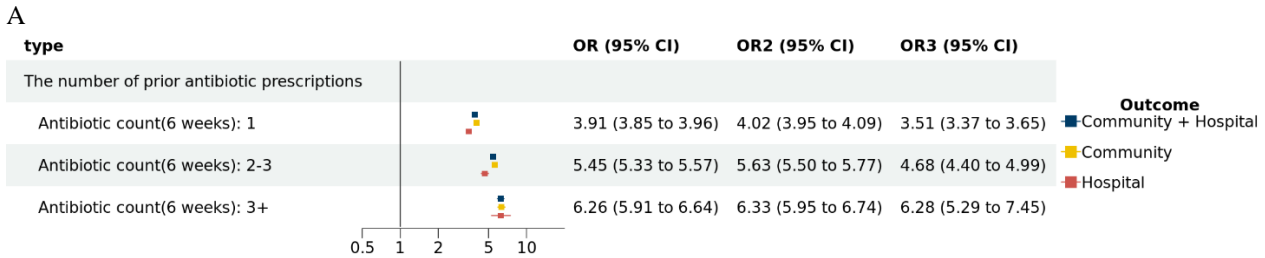

B

**eFigure 5. ORs for the number of antibiotics given within six weeks before the index date**

OR: Community + Hospital, OR2: Community, OR3: Hospital

A. crude ORs

B. adjusted for all comorbidities\*

All comorbidities\* Hypertension, chronic cardiac disease, diabetes, stroke, chronic kidney disease or renal replacement therapy) and asthma, cancer (non-haematological and haematological), chronic liver disease, dementia, other neurological disease (including motor neuron disease, myasthenia gravis, multiple sclerosis, Parkinson's disease, cerebral palsy, quadriplegia or hemiplegia, and progressive cerebellar disease), organ kidney transplant, asplenia (due to splenectomy or spleen dysfunction, including sickle cell disease), rheumatoid arthritis/lupus/psoriasis, other immunosuppressive conditions, learning disability, several mental ill, the number of prior antibiotic prescription from one year and six week to six week before the index time (indicating the infection history)

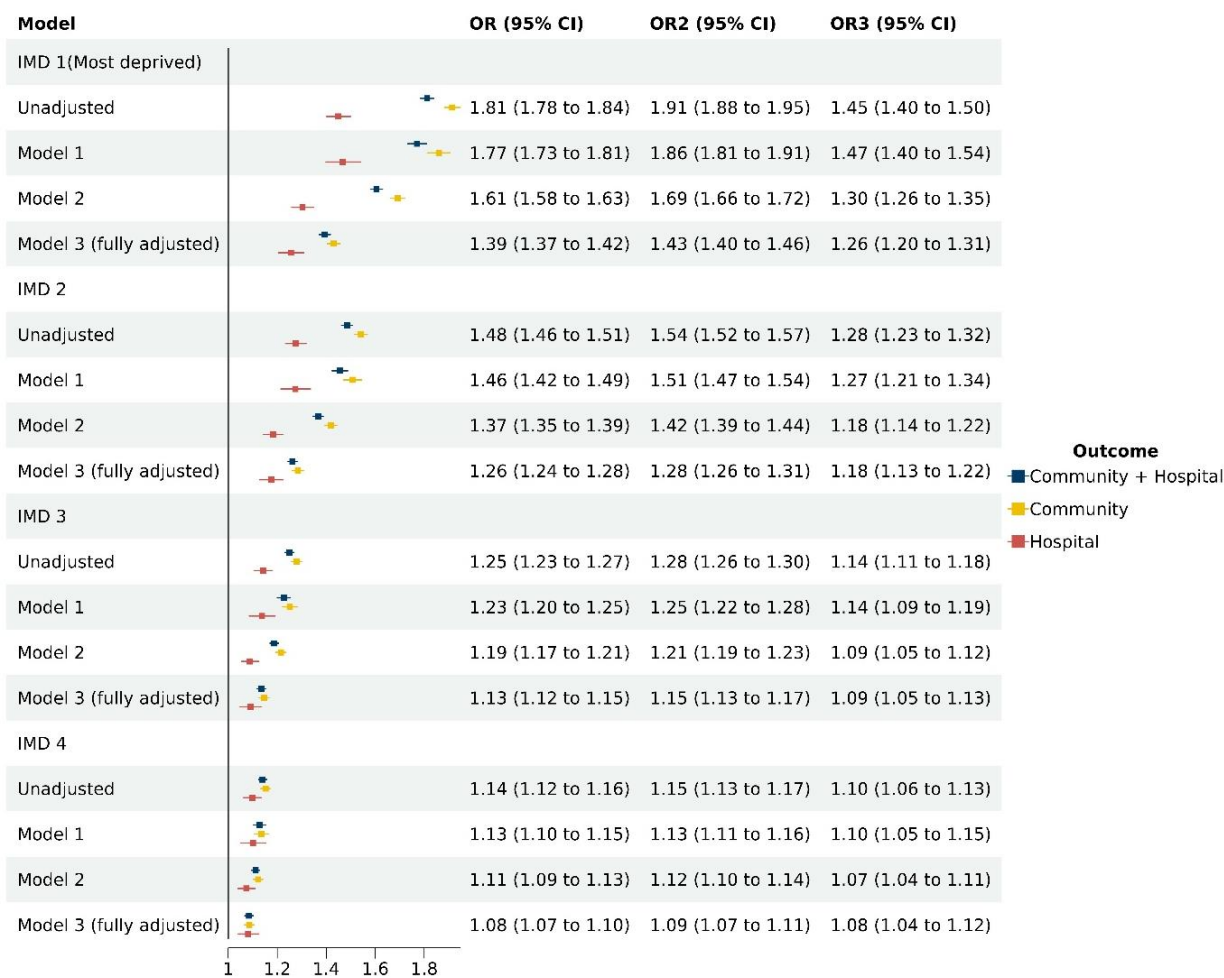

**eFigure 6. Association between index of multiple deprivations (IMD) quintile and risk of hospital admission for Sepsis (18+ years old study population)**

OR: Community + Hospital, OR2: Community, OR3: Hospital

IMD (Index of Multiple Deprivation) quintile measured from patient-level address.

Odds ratios are compared to the least deprived quintile (IMD 5)

Model 1 – adjusted for interaction term between IMD and time (Period 1: 2019-01-01 to 2020-03-25; Period 2: 2020-03-26 to 2021-03-08; Period 3: 2021-03-09 to 2022-06-30)

Model 2 – adjusted for cardiometabolic comorbidities\*

Model 3 (fully adjusted model) – adjust for all comorbidities\*\*

Cardiometabolic comorbidities\* Hypertension, chronic cardiac disease, diabetes, stroke, chronic kidney disease or renal replacement therapy)

All comorbidities\*\* Cardiometabolic comorbidities and asthma, cancer (non-haematological and haematological), chronic liver disease, dementia, other neurological disease (including motor neuron disease, myasthenia gravis, multiple sclerosis, Parkinson's disease, cerebral palsy, quadriplegia or hemiplegia, and progressive cerebellar disease), organ kidney transplant, asplenia (due to splenectomy or spleen dysfunction, including sickle cell disease), rheumatoid arthritis/lupus/psoriasis, other immunosuppressive conditions, learning disability, several mental ill, the number of prior antibiotic prescription from one year and six week to six week before the index time (indicating the infection history)

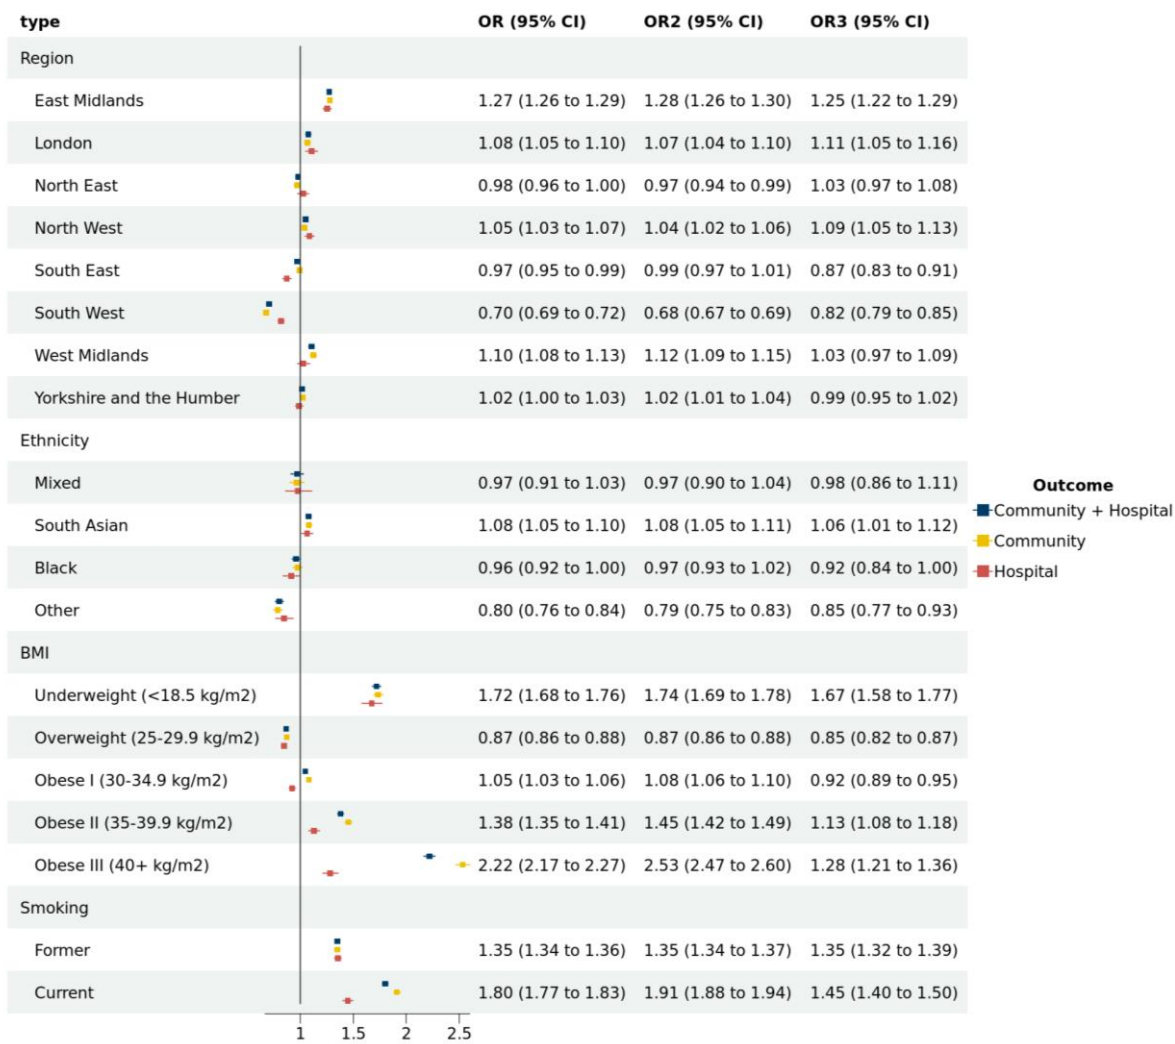

**eFigure 7. Crude ORs of sepsis by region, ethnicity, BMI, smoking history and stratified by type of sepsis (18+ years old study population)**

OR: Community + Hospital, OR2: Community, OR3: Hospital

BMI, Body Mass Index (from the most recent clinical records)

Models were unadjusted crude model.

**Reference groups:**

Region: East of England

Ethnicity: white

BMI: healthy range (18.5 – 24.9 kg/m<sup>2</sup>)

Smoking: never (Smoking status identified from the most recent clinical records)

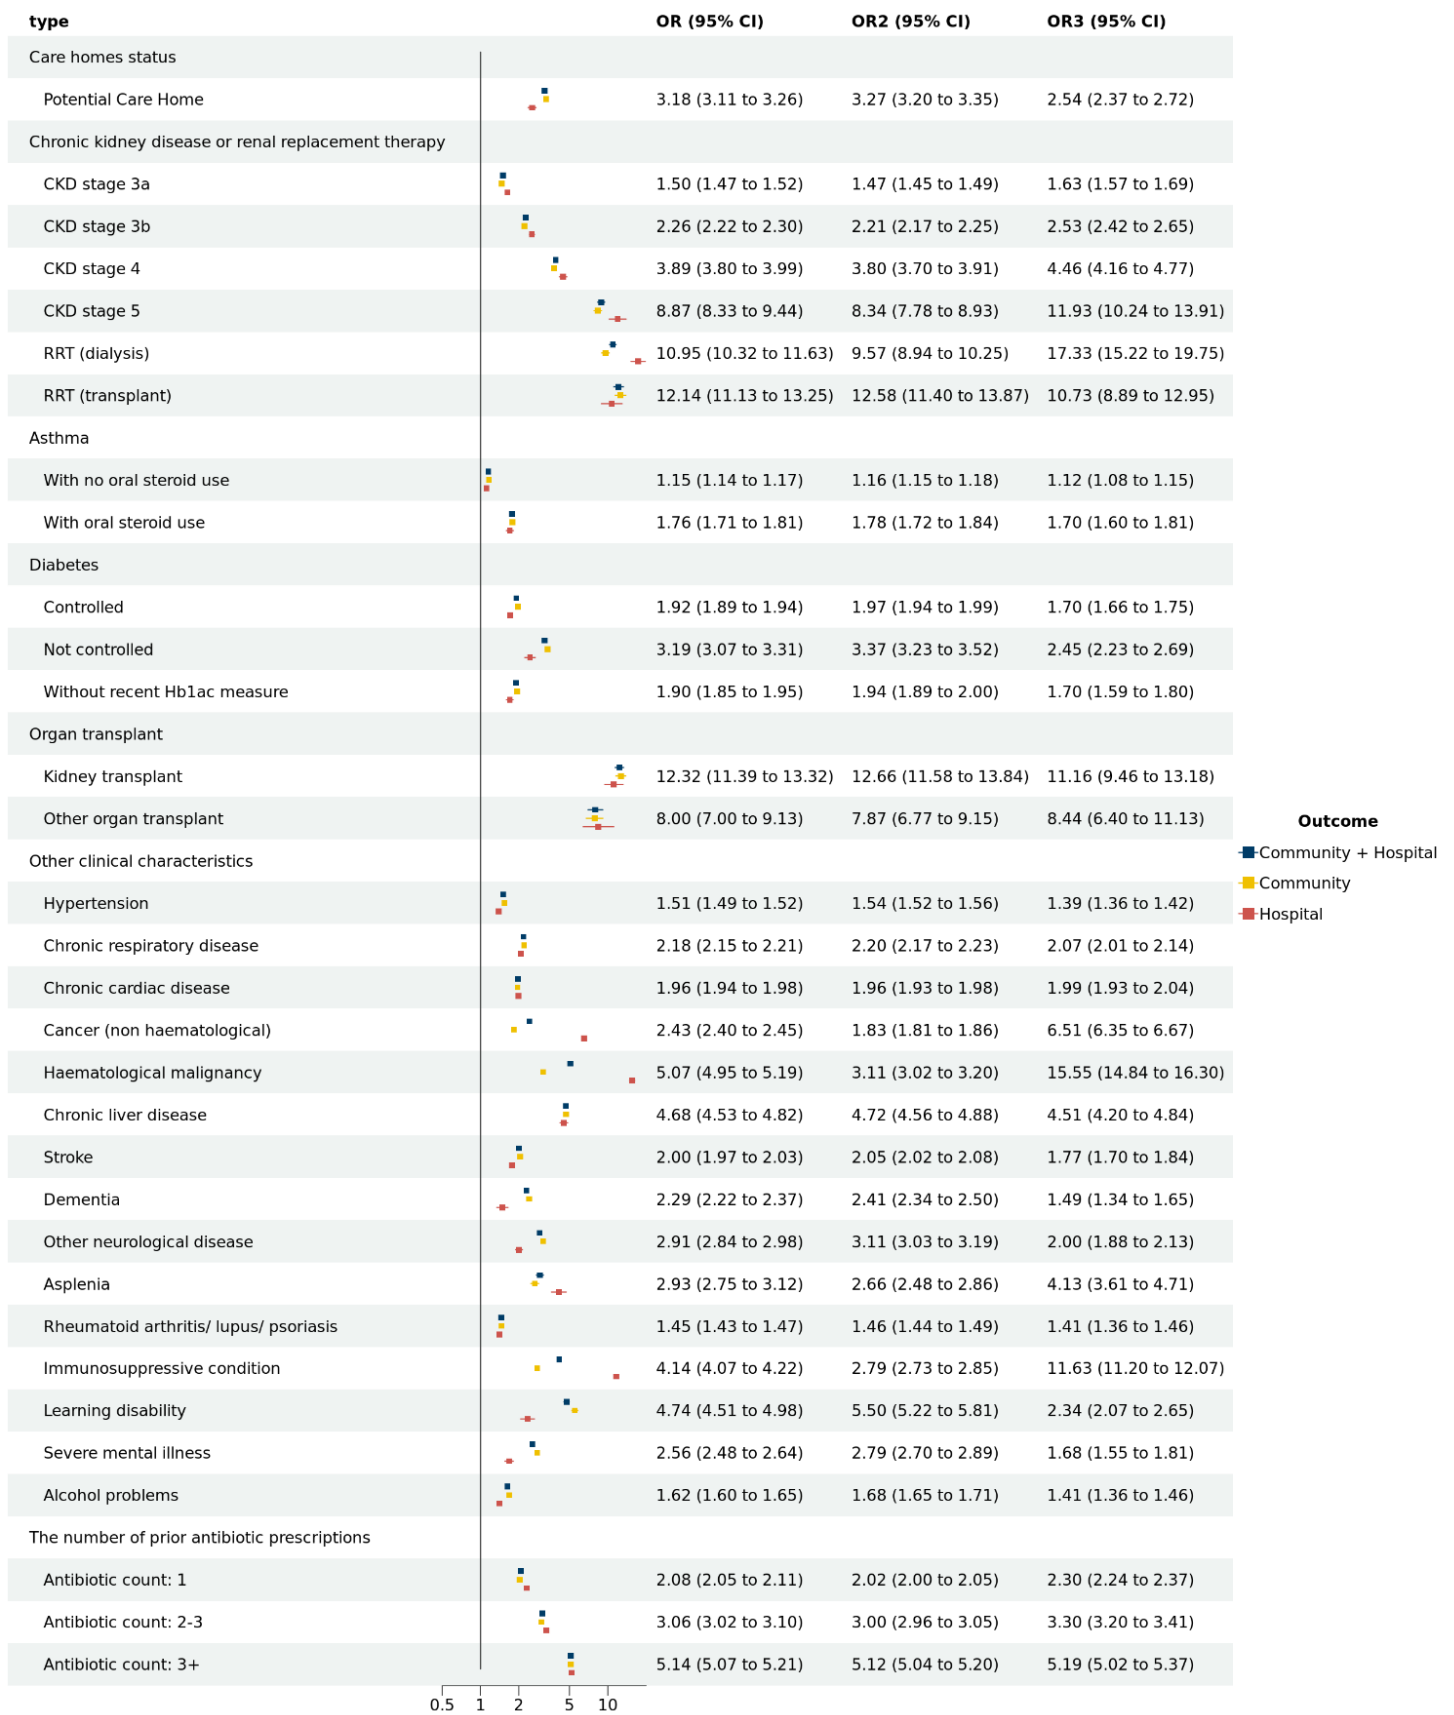

**eFigure 8. Crude ORs of developing sepsis for clinical characteristics stratified by sepsis type (18+ years old study population)**

OR: Community + Hospital, OR2: Community, OR3: Hospital

Reference groups:

Clinical characteristics: the patients without the clinical disease.

The number of prior antibiotic prescriptions: antibiotic count: 0.

Models were unadjusted

All comorbidities\* Hypertension, chronic cardiac disease, diabetes, stroke, chronic kidney disease or renal replacement therapy) and asthma, cancer (non-haematological and haematological), chronic liver disease, dementia, other neurological disease (including motor neuron disease, myasthenia gravis, multiple sclerosis, Parkinson's disease, cerebral palsy, quadriplegia or hemiplegia, and progressive cerebellar disease), organ kidney transplant, asplenia (due to splenectomy or spleen dysfunction, including sickle cell disease), rheumatoid arthritis/lupus/psoriasis, other immunosuppressive conditions, learning disability, several mental ill, the number of prior antibiotic prescription from one year and six week to six week before the index time (indicating the infection history)

Abbreviations: CKD, chronic kidney disease; RRT, renal replacement therapy.

The number of prior antibiotic prescriptions (one year plus six weeks to six weeks before the index date)

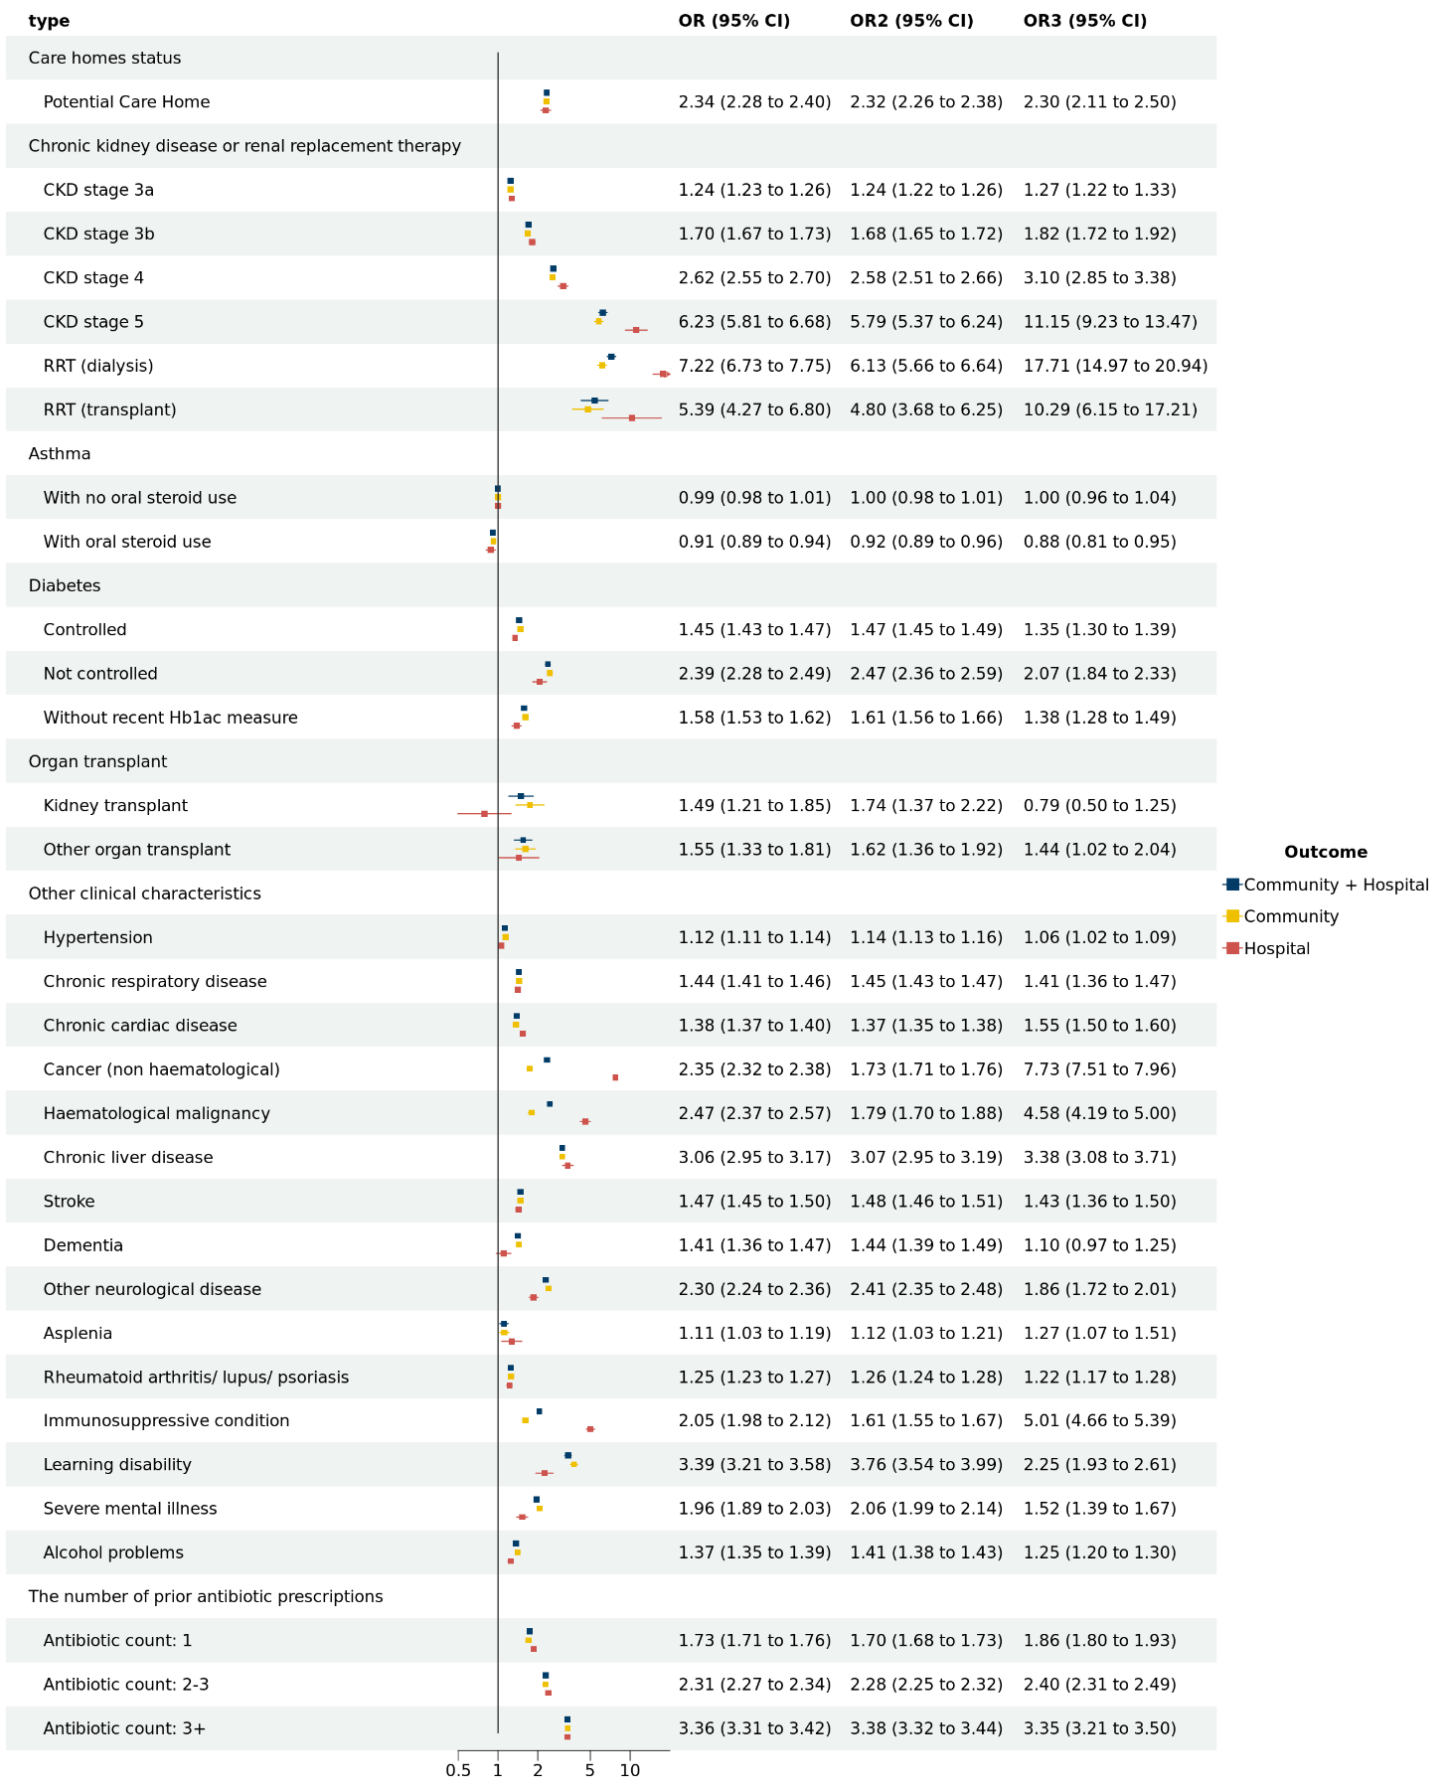



**eFigure 9. Adjusted ORs of developing sepsis for clinical characteristics stratified by sepsis type (18+ years old study population)**

OR: Community + Hospital, OR2: Community, OR3: Hospital

Reference groups:

Clinical characteristics: the patients without the clinical disease.

The number of prior antibiotic prescriptions: antibiotic count: 0.

Models were adjusted for all comorbidities\*

All comorbidities\* Hypertension, chronic cardiac disease, diabetes, stroke, chronic kidney disease or renal replacement therapy) and asthma, cancer (non-haematological and haematological), chronic liver disease, dementia, other neurological disease (including motor neuron disease, myasthenia gravis, multiple sclerosis, Parkinson's disease, cerebral palsy, quadriplegia or hemiplegia, and progressive cerebellar disease), organ kidney transplant, asplenia (due to splenectomy or spleen dysfunction, including sickle cell disease), rheumatoid arthritis/lupus/psoriasis, other immunosuppressive conditions, learning disability, several mental ill, the number of prior antibiotic prescription from one year and six week to six week before the index time (indicating the infection history)

Abbreviations: CKD, chronic kidney disease; RRT, renal replacement therapy.

The number of prior antibiotic prescriptions (one year plus six weeks to six weeks before the index date)

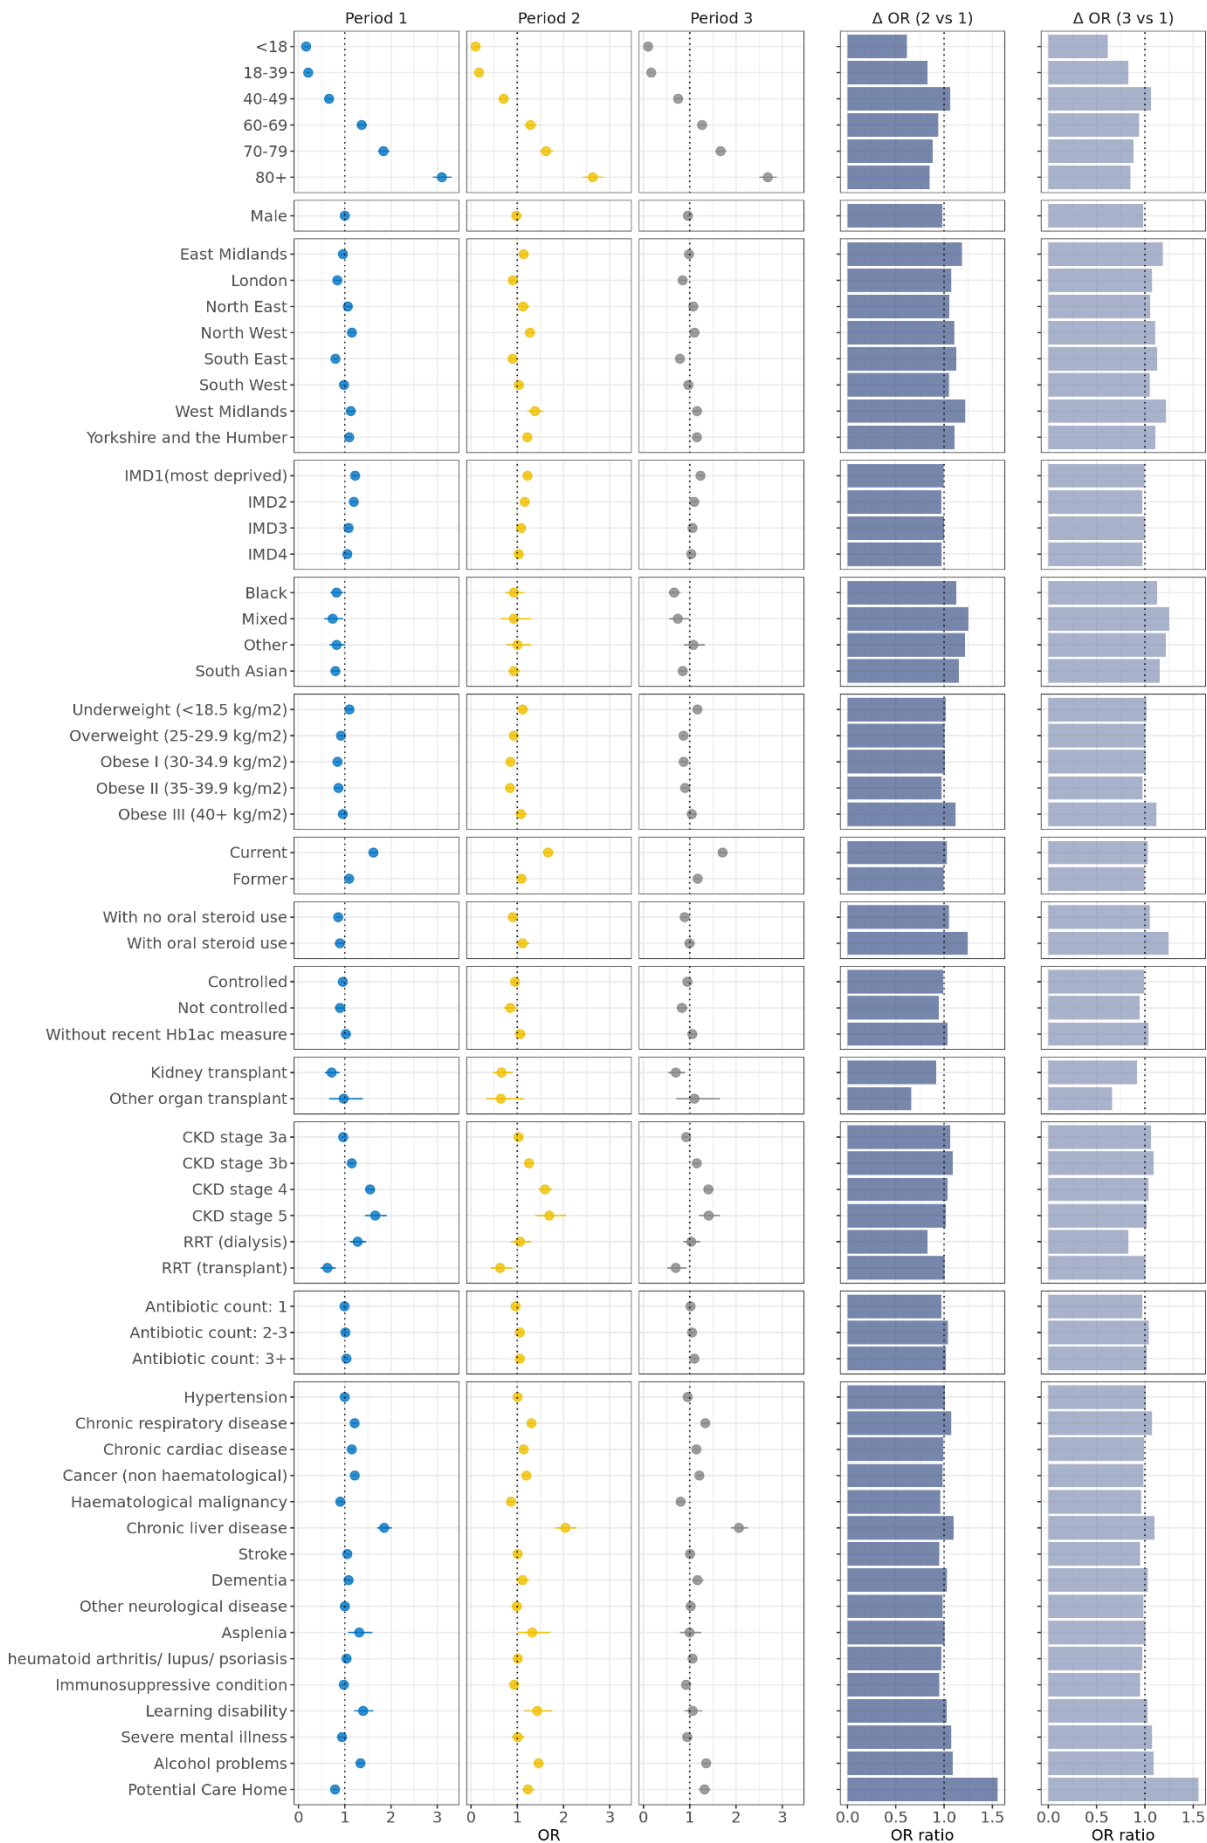

## eFigure 10. Adjusted ORs of all sepsis mortality stratified by COVID-19 period

Relative odds ratio of 30-day mortality after sepsis and 95% confidence intervals in OpenSAFELY-TPP in the three periods (Period 1: 2019-01-01 to 2020-03-25; Period 2: 2020-03-26 to 2021-03-08; Period 3: 2021-03-09 to 2022-06-30).

Models were adjusted for age using a 4-knot cubic spline, except for estimation of age group relative odds of 30-day mortality; and adjusted for sex, except for estimation of sex group relative odds of 30-day mortality; and stratified by region, except for IMD group relative odds of 30-day mortality.

The two columns on the right present the ratio of the relative odds of 30-day mortality (fold-change:  $\Delta$  OR) of period 2 vs 1 and period 3 vs 1.

Abbreviations: IMD, index of multiple deprivation; BMI, body mass index; Tx, transplant; CKD, chronic kidney disease; RRT, renal replacement therapy.

The relative odds of 30-day mortality presented in this figure can be found in table SX of the Supplementary material.

The number of prior antibiotic prescriptions (one year plus six weeks to six weeks before the index date)

Reference sub-group:

age: 50-59 years

sex: female

region: East of England

IMD: the least deprived quintile

ethnicity: white

BMI: healthy range (18.5 – 24.9 kg/m<sup>2</sup>)

smoking: never

prior antibiotic count: 0

Patients without the disease were used as the reference for other clinical conditions.

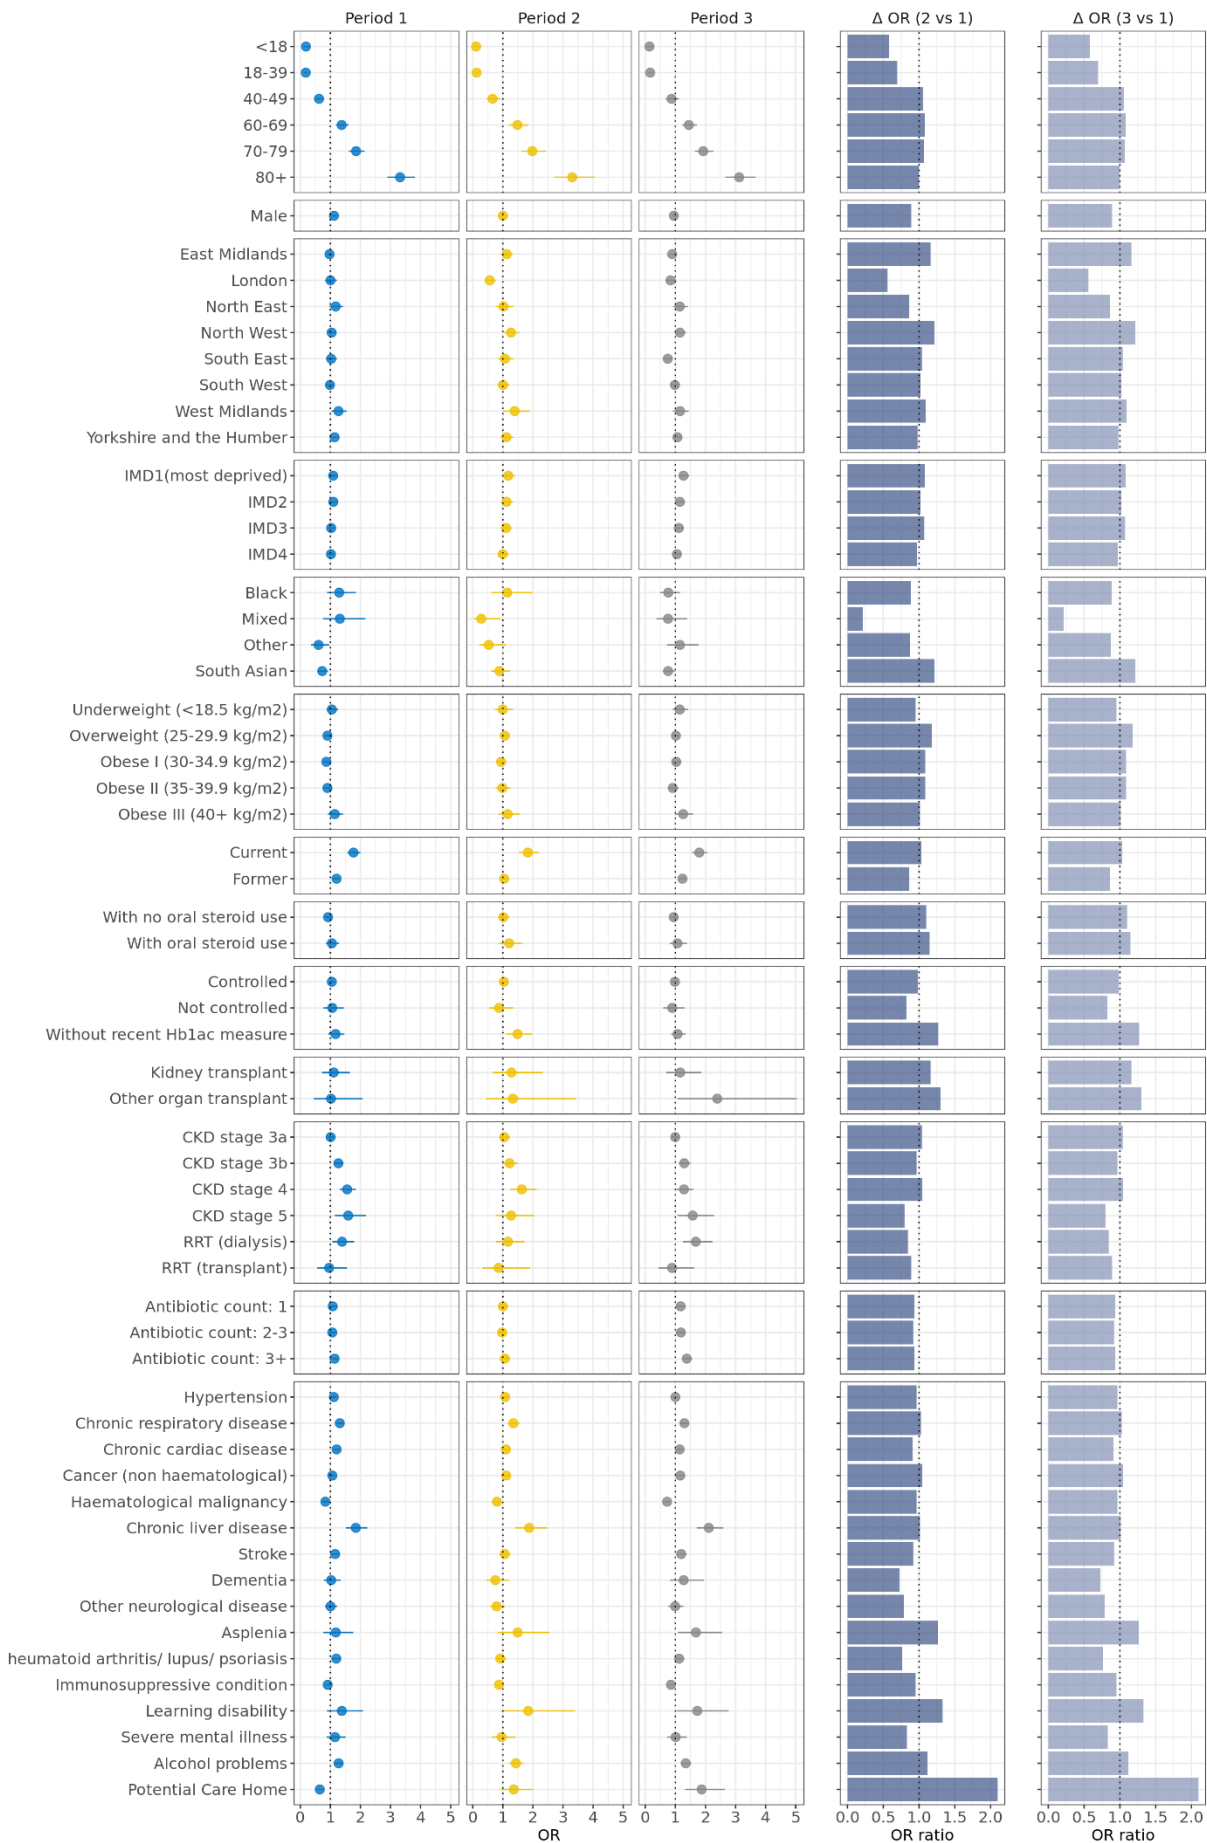

### **eFigure 11. Adjusted ORs of hospital-acquired sepsis mortality stratified by COVID-19 period**

Relative odds ratio of 30-day mortality after sepsis and 95% confidence intervals in OpenSAFELY-TPP in the three periods (Period 1: 2019-01-01 to 2020-03-25; Period 2: 2020-03-26 to 2021-03-08; Period 3: 2021-03-09 to 2022-06-30).

Models were adjusted for age using a 4-knot cubic spline, except for estimation of age group relative odds of 30-day mortality; and adjusted for sex, except for estimation of sex group relative odds of 30-day mortality; and stratified by region, except for IMD group relative odds of 30-day mortality.

The two columns on the right present the ratio of the relative odds of 30-day mortality (fold-change:  $\Delta$  OR) of period 2 vs 1 and period 3 vs 1.

Abbreviations: IMD, index of multiple deprivation; BMI, body mass index; Tx, transplant; CKD, chronic kidney disease; RRT, renal replacement therapy.

The number of prior antibiotic prescriptions (one year plus six weeks to six weeks before the index date)

Reference sub-group:

age: 50-59 years

sex: female

region: East of England

IMD: the least deprived quintile

ethnicity: white

BMI: healthy range (18.5 – 24.9 kg/m<sup>2</sup>)

smoking: never

prior antibiotic count: 0

Patients without the disease were used as the reference for other clinical conditions.

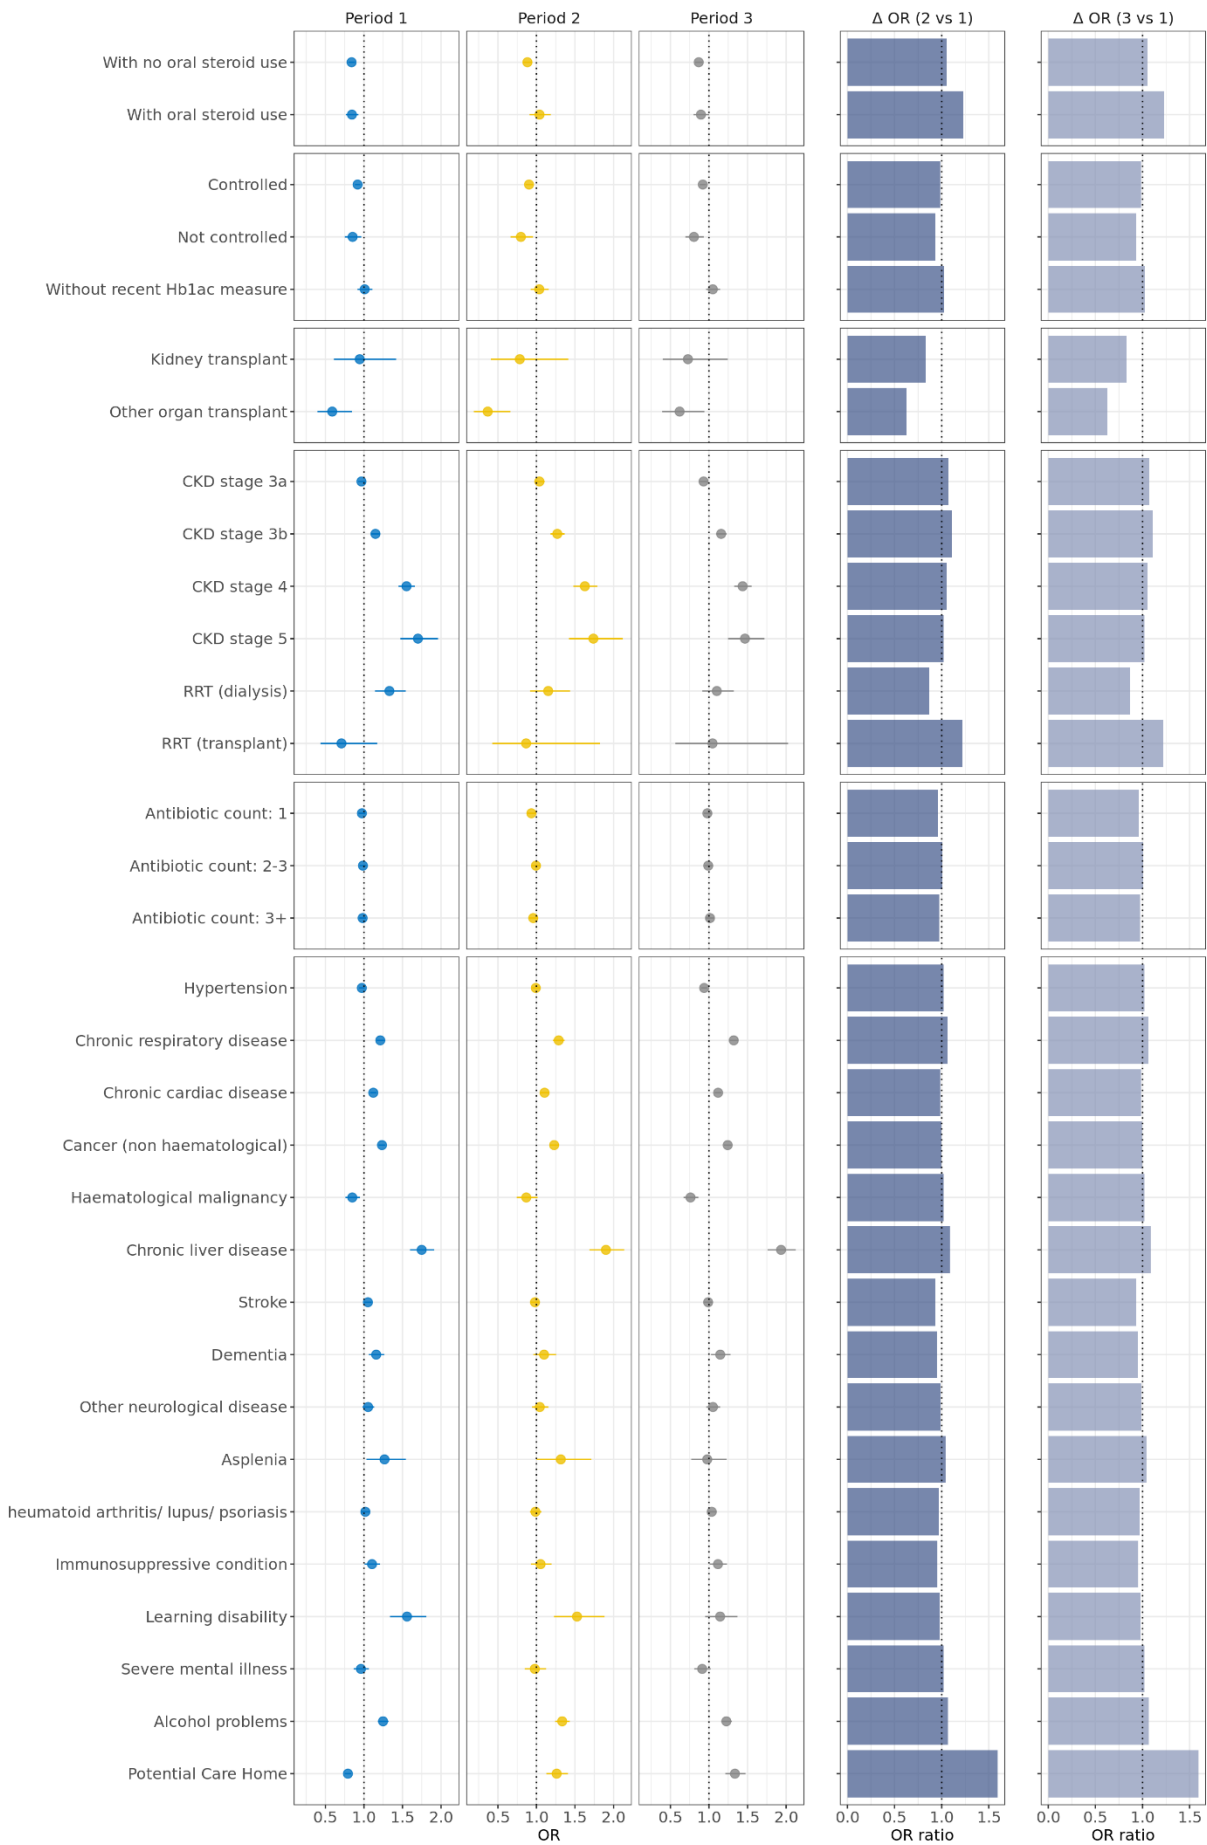

## **eFigure 12. Fully adjusted ORs of all sepsis mortality stratified by COVID-19 period**

Relative odds ratio of 30-day mortality after sepsis and 95% confidence intervals in OpenSAFELY-TPP in the three periods (Period 1: 2019-01-01 to 2020-03-25; Period 2: 2020-03-26 to 2021-03-08; Period 3: 2021-03-09 to 2022-06-30).

Models were adjusted for age using a 4-knot cubic spline, except for estimation of age group relative odds of 30-day mortality; and adjusted for sex, except for estimation of sex group relative odds of 30-day mortality; and stratified by region, except for IMD group relative odds of 30-day mortality.

The two columns on the right present the ratio of the relative odds of 30-day mortality (fold-change:  $\Delta$  OR) of period 2 vs 1 and period 3 vs 1.

Abbreviations: CKD, chronic kidney disease; RRT, renal replacement therapy.

The number of prior antibiotic prescriptions (one year plus six weeks to six weeks before the index date)

Reference sub-group:

Patients without the disease were used as the reference for other clinical conditions.

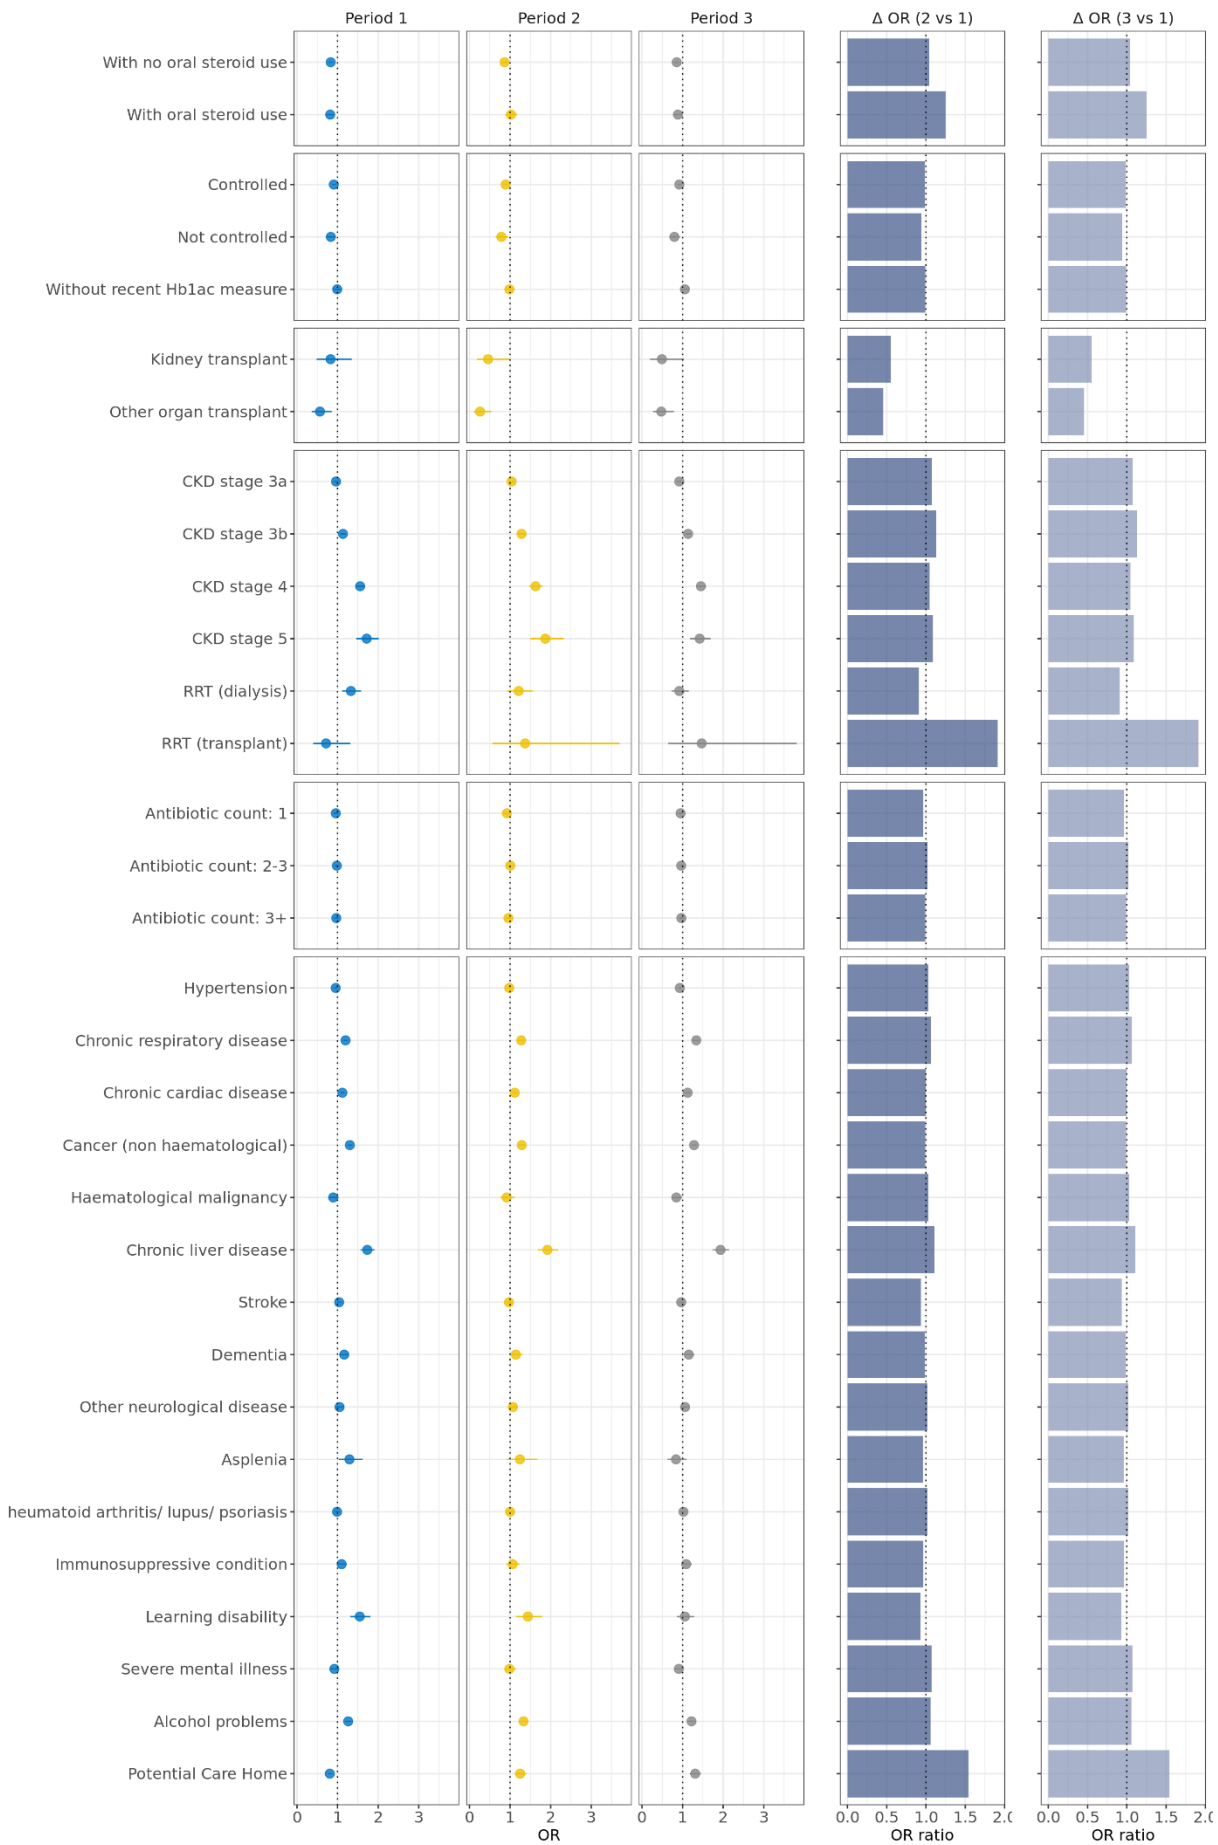



### **eFigure 13. Fully adjusted ORs of community-acquired sepsis mortality stratified by COVID-19 period**

Relative odds ratio of 30-day mortality after sepsis and 95% confidence intervals in OpenSAFELY-TPP in the three periods (Period 1: 2019-01-01 to 2020-03-25; Period 2: 2020-03-26 to 2021-03-08; Period 3: 2021-03-09 to 2022-06-30).

Models were adjusted for age using a 4-knot cubic spline, except for estimation of age group relative odds of 30-day mortality; and adjusted for sex, except for estimation of sex group relative odds of 30-day mortality; and stratified by region, except for IMD group relative odds of 30-day mortality.

The two columns on the right present the ratio of the relative odds of 30-day mortality (fold-change:  $\Delta$  OR) of period 2 vs 1 and period 3 vs 1.

Abbreviations: CKD, chronic kidney disease; RRT, renal replacement therapy.

The number of prior antibiotic prescriptions (one year plus six weeks to six weeks before the index date)

Reference sub-group:

Patients without the disease were used as the reference for other clinical conditions.

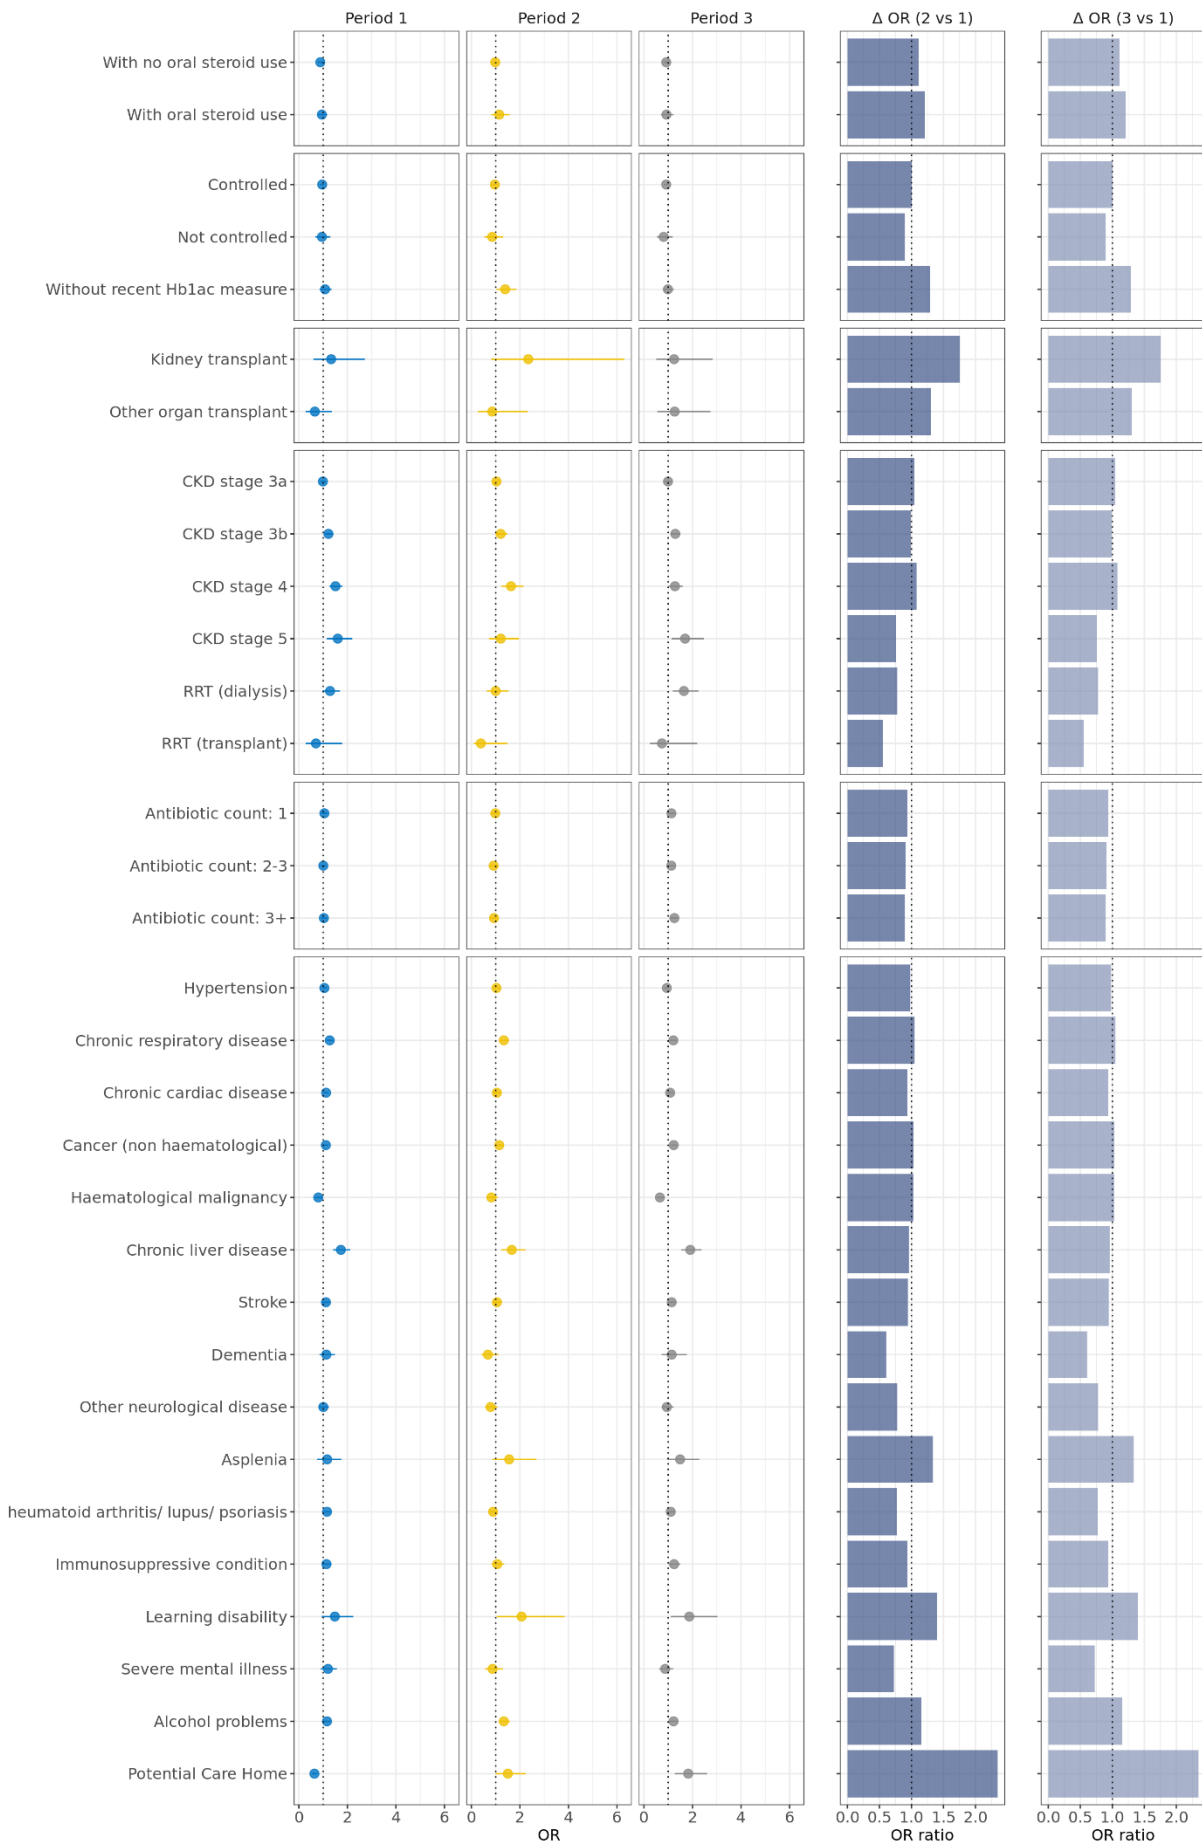

#### **eFigure 14. Fully adjusted ORs of hospital-acquired sepsis mortality stratified by COVID-19 period**

Relative odds ratio of 30-day mortality after sepsis and 95% confidence intervals in OpenSAFELY-TPP in the three periods (Period 1: 2019-01-01 to 2020-03-25; Period 2: 2020-03-26 to 2021-03-08; Period 3: 2021-03-09 to 2022-06-30).

Models were adjusted for age using a 4-knot cubic spline, except for estimation of age group relative odds of 30-day mortality; and adjusted for sex, except for estimation of sex group relative odds of 30-day mortality; and stratified by region, except for IMD group relative odds of 30-day mortality.

The two columns on the right present the ratio of the relative odds of 30-day mortality (fold-change:  $\Delta$  OR) of period 2 vs 1 and period 3 vs 1.

Abbreviations: CKD, chronic kidney disease; RRT, renal replacement therapy.

The number of prior antibiotic prescriptions (one year plus six weeks to six weeks before the index date)

Reference sub-group:

Patients without the disease were used as the reference for other clinical conditions.

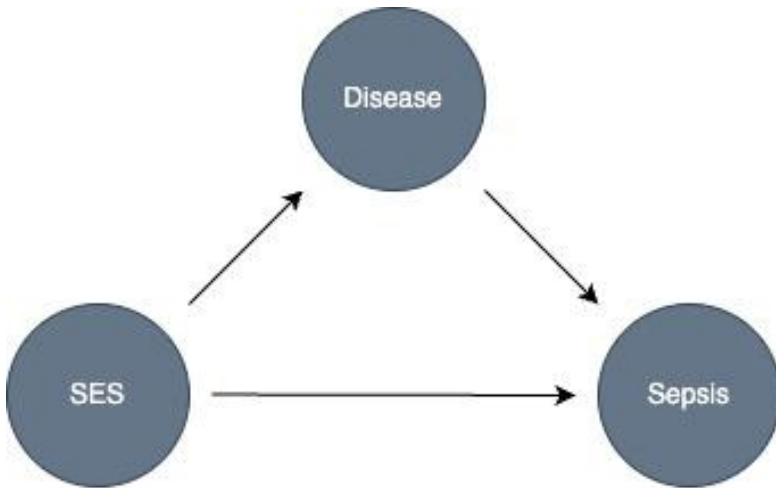

**eFigure 15. Directed acyclic graph (DAG) of the association between IMD (socioeconomic status) and the risk of developing non-COVID-19 sepsis**

SES: Socioeconomic status  
Sepsis: non-COVID-19 sepsis

## Reference

- 1 English indices of deprivation 2019 - GOV.UK. <https://www.gov.uk/government/statistics/english-indices-of-deprivation-2019> (accessed 17 June 2023)
- 2 Identification and classification | Diagnosis | Obesity | CKS | NICE. <https://cks.nice.org.uk/topics/obesity/diagnosis/identification-classification/> (accessed 15 March 2023)
- 3 Moons KGM, Altman DG, Reitsma JB, *et al.* Transparent Reporting of a multivariable prediction model for Individual Prognosis Or Diagnosis (TRIPOD): Explanation and Elaboration. <https://doi.org/107326/M14-0698>. 2015;162:W1–73.
- 4 Variable reference - OpenSAFELY documentation. <https://docs.opensafely.org/study-def-variables/> (accessed 15 March 2023)
- 5 Russell MD, Galloway JB, Andrews CD, *et al.* Incidence and management of inflammatory arthritis in England before and during the COVID-19 pandemic: a population-level cohort study using OpenSAFELY. *Lancet Rheumatol.* 2022;4:e853–63.
- 6 NHS Health Check - NHS. <https://www.nhs.uk/conditions/nhs-health-check/> (accessed 17 October 2023)
- 7 Molokhia M, Ayis DS, Karamanos A, *et al.* What factors influence differential uptake of NHS Health Checks, diabetes and hypertension reviews among women in ethnically diverse South London? Cross-sectional analysis of 63,000 primary care records. *EClinicalMedicine.* 2022;49. doi: 10.1016/J.ECLINM.2022.101471
- 8 Meydan C, Bekenstein U, Soreq H. Molecular regulatory pathways link sepsis with metabolic syndrome: Non-coding RNA elements underlying the sepsis/metabolic cross-talk. *Front Mol Neurosci.* 2018;11:189.
- 9 Ponsford MJ, Gkatzionis A, Walker VM, *et al.* Cardiometabolic Traits, Sepsis, and Severe COVID-19: A Mendelian Randomization Investigation. *Circulation.* 2020;142:1791.

Supplement:the OpenSAFELY collaborative

|                                   |                   |                      |           |        |            |                     |
|-----------------------------------|-------------------|----------------------|-----------|--------|------------|---------------------|
| alex.walker@phc.ox.ac.uk          | bennett institute | University of Oxford | Alex      | J      | Walker     | 0000-0003-4932-6135 |
| brian.mackenna@phc.ox.ac.uk       | bennett institute | University of Oxford | Brian     |        | MacKenna   | 0000-0002-3786-9063 |
| peter.inglesby@phc.ox.ac.uk       | bennett institute | University of Oxford | Peter     |        | Inglesby   | 0000-0002-7784-1719 |
| ben.goldacre@phc.ox.ac.uk         | bennett institute | University of Oxford | Ben       |        | Goldacre   | 0000-0002-5127-4728 |
| helen.curtis@phc.ox.ac.uk         | bennett institute | University of Oxford | Helen     | J      | Curtis     | 0000-0003-3429-9576 |
| jessica.morley@phc.ox.ac.uk       | bennett institute | University of Oxford | Jessica   |        | Morley     | 0000-0001-5221-4770 |
| amir.mehrkar@phc.ox.ac.uk         | bennett institute | University of Oxford | Amir      |        | Mehrkar    | 0000-0002-2098-1278 |
| sebastian.bacon@phc.ox.ac.uk      | bennett institute | University of Oxford | Sebastian | C<br>J | Bacon      | 0000-0002-6354-3454 |
| george.hickman@thedatalab.org     | bennett institute | University of Oxford | George    |        | Hickman    | 0000-0002-6691-4046 |
| richard.croker@phc.ox.ac.uk       | bennett institute | University of Oxford | Richard   |        | Croker     | 0000-0002-8114-9186 |
| david.evans@phc.ox.ac.uk          | bennett institute | University of Oxford | David     |        | Evans      | 0000-0002-1100-079X |
| thomas.ward@phc.ox.ac.uk          | bennett institute | University of Oxford | Tom       |        | Ward       | 0000-0003-3743-1456 |
| nicholas.devito@phc.ox.ac.uk      | bennett institute | University of Oxford | Nicholas  | J      | DeVito     | 0000-0001-8286-1995 |
| louis.fisher@phc.ox.ac.uk         | bennett institute | University of Oxford | Louis     |        | Fisher     | 0000-0002-0295-3812 |
| amelia.green@phc.ox.ac.uk         | bennett institute | University of Oxford | Amelia    | C<br>A | Green      | 0000-0002-7246-2074 |
| jon.massey@phc.ox.ac.uk           | bennett institute | University of Oxford | Jon       |        | Massey     | 0000-0002-2497-4040 |
| rebecca.smith@phc.ox.ac.uk        | bennett institute | University of Oxford | Rebecca   | M      | Smith      |                     |
| william.hulme@phc.ox.ac.uk        | bennett institute | University of Oxford | William   | J      | Hulme      | 0000-0002-9162-4999 |
| simon.davy@thedatalab.org         | bennett institute | University of Oxford | Simon     |        | Davy       | 0000-0001-9890-3619 |
| colm.andrews@phc.ox.ac.uk         | bennett institute | University of Oxford | Colm      | D      | Andrews    | 0000-0003-2715-0562 |
| Lisa.Hopcroft@phc.ox.ac.uk        | bennett institute | University of Oxford | Lisa      | E<br>M | Hopcroft   | 0000-0002-7022-1322 |
| iain.dillingham@phc.ox.ac.uk      | bennett institute | University of Oxford | Iain      |        | Dillingham |                     |
| rose.higgins@phc.ox.ac.uk         | bennett institute | University of Oxford | Rose      |        | Higgins    | 0000-0002-5295-4370 |
| christine.cunningham@phc.ox.ac.uk | bennett institute | University of Oxford | Christine |        | Cunningham | 0000-0001-6802-7355 |
| milan.wiedemann@phc.ox.ac.uk      | bennett institute | University of Oxford | Milan     |        | Wiedemann  | 0000-0003-1991-282X |
| linda.nab@phc.ox.ac.uk            | bennett institute | University of Oxford | Linda     |        | Nab        | 0000-0002-1821-7246 |
| steven.maude@phc.ox.ac.uk         | bennett institute | University of Oxford | Steven    |        | Maude      | 0000-0002-6112-5101 |

|                                    |                   |                      |             |        |             |                     |
|------------------------------------|-------------------|----------------------|-------------|--------|-------------|---------------------|
| orla.macdonald@oxfordhealth.nhs.uk | bennett institute | Oxford Health NHS FT | Orla        |        | Macdonald   | 0000-0003-2774-0001 |
| benjamin.butler-cole@phc.ox.ac.uk  | bennett institute | University of Oxford | Ben         | F<br>C | Butler-Cole |                     |
| thomas.odwyer@phc.ox.ac.uk         | bennett institute | University of Oxford | Thomas      |        | O'Dwyer     | 0000-0002-4373-1597 |
| catherine.stables@phc.ox.ac.uk     | bennett institute | University of Oxford | Catherine   | L      | Stables     | 0000-0002-5173-3090 |
| christopher.wood@phc.ox.ac.uk      | bennett institute | University of Oxford | Christopher |        | Wood        | 0000-0001-5184-0606 |
| andrew.brown@phc.ox.ac.uk          | bennett institute | University of Oxford | Andrew      | D      | Brown       | 0000-0002-3688-8393 |
| victoria.speed@phc.ox.ac.uk        | bennett institute | University of Oxford | Victoria    |        | Speed       | 000-0001-5064-9375  |
| lucy.bridges@phc.ox.ac.uk          | bennett institute | University of Oxford | Lucy        |        | Bridges     | 0000-0002-4407-9596 |
| andrea.schaffer@phc.ox.ac.uk       | bennett institute | University of Oxford | Andrea      | L      | Schaffer    | 0000-0002-3701-4997 |
| caroline.walters@phc.ox.ac.uk      | bennett institute | University of Oxford | Caroline    | E      | Walters     | 0000-0003-1882-0886 |
| chris.bates@tpp-uk.com             | TPP               | TPP                  | Christopher |        | Bates       | 0000-0003-0113-2593 |
| jonathan.cockburn@tpp-uk.com       | TPP               | TPP                  | Jonathan    |        | Cockburn    | 0000-0002-4681-4873 |
| john.parry@tpp-uk.com              | TPP               | TPP                  | John        |        | Parry       |                     |
| fxhester@tpp-uk.com                | TPP               | TPP                  | Frank       |        | Hester      |                     |
| sam.harper@tpp-uk.com              | TPP               | TPP                  | Sam         |        | Harper      |                     |
